# Supplementary material for: Association of short-term exposure to ambient PM2.5 with hospital admissions and 30-day readmissions in end-stage renal disease patients: population-based retrospective cohort study
Source: PubMed Central journal article supplement — BMJ Open. 2020 Dec 15;10(12):e041177. doi: 10.1136/bmjopen-2020-041177 (PMC7745516; doi:10.1136/bmjopen-2020-041177), 2020-12-15
Supplement: bmjopen-2020-041177.draft_revisions.pdf [file bmjopen-2020-041177.draft_revisions.pdf]

# BMJ Open

BMJ Open is committed to open peer review. As part of this commitment we make the peer review history of every article we publish publicly available.

When an article is published we post the peer reviewers' comments and the authors' responses online. We also post the versions of the paper that were used during peer review. These are the versions that the peer review comments apply to.

The versions of the paper that follow are the versions that were submitted during the peer review process. They are not the versions of record or the final published versions. They should not be cited or distributed as the published version of this manuscript.

BMJ Open is an open access journal and the full, final, typeset and author-corrected version of record of the manuscript is available on our site with no access controls, subscription charges or pay-per-view fees (<http://bmjopen.bmj.com>).

If you have any questions on BMJ Open's open peer review process please email [info.bmjopen@bmj.com](mailto:info.bmjopen@bmj.com)

# BMJ Open

## Association of short-term exposure to ambient PM2.5 with hospital admissions and 30-day readmissions in end-stage renal disease patients: population based retrospective cohort study

|                               |                                                                                                                                                                                                                                                                                                                                                                                                                                                                                                                                                                              |
|-------------------------------|------------------------------------------------------------------------------------------------------------------------------------------------------------------------------------------------------------------------------------------------------------------------------------------------------------------------------------------------------------------------------------------------------------------------------------------------------------------------------------------------------------------------------------------------------------------------------|
| Journal:                      | <i>BMJ Open</i>                                                                                                                                                                                                                                                                                                                                                                                                                                                                                                                                                              |
| Manuscript ID                 | bmjopen-2020-041177                                                                                                                                                                                                                                                                                                                                                                                                                                                                                                                                                          |
| Article Type:                 | Original research                                                                                                                                                                                                                                                                                                                                                                                                                                                                                                                                                            |
| Date Submitted by the Author: | 01-Jun-2020                                                                                                                                                                                                                                                                                                                                                                                                                                                                                                                                                                  |
| Complete List of Authors:     | Wyatt, Lauren; United States Environmental Protection Agency<br>Xi, Yuzhi; US Environmental Protection Agency (ORISE)<br>Kshirsagar, Abhijit; University of North Carolina Kidney Center and Division of Nephrology and Hypertension<br>Di, Qian; Tsinghua University<br>Ward-Caviness, Cavin; United States Environmental Protection Agency<br>Wade, Timothy; United States Environmental Protection Agency<br>Cascio, Wayne E.; United States Environmental Protection Agency<br>Rappold, Ana; United States Environmental Protection Agency Research Triangle Park Campus |
| Keywords:                     | EPIDEMIOLOGY, PUBLIC HEALTH, NEPHROLOGY                                                                                                                                                                                                                                                                                                                                                                                                                                                                                                                                      |
|                               |                                                                                                                                                                                                                                                                                                                                                                                                                                                                                                                                                                              |

SCHOLARONE™  
Manuscripts

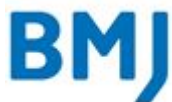

I, the Submitting Author has the right to grant and does grant on behalf of all authors of the Work (as defined in the below author licence), an exclusive licence and/or a non-exclusive licence for contributions from authors who are: i) UK Crown employees; ii) where BMJ has agreed a CC-BY licence shall apply, and/or iii) in accordance with the terms applicable for US Federal Government officers or employees acting as part of their official duties; on a worldwide, perpetual, irrevocable, royalty-free basis to BMJ Publishing Group Ltd ("BMJ") its licensees and where the relevant Journal is co-owned by BMJ to the co-owners of the Journal, to publish the Work in this journal and any other BMJ products and to exploit all rights, as set out in our [licence](#).

The Submitting Author accepts and understands that any supply made under these terms is made by BMJ to the Submitting Author unless you are acting as an employee on behalf of your employer or a postgraduate student of an affiliated institution which is paying any applicable article publishing charge ("APC") for Open Access articles. Where the Submitting Author wishes to make the Work available on an Open Access basis (and intends to pay the relevant APC), the terms of reuse of such Open Access shall be governed by a Creative Commons licence – details of these licences and which [Creative Commons](#) licence will apply to this Work are set out in our licence referred to above.

Other than as permitted in any relevant BMJ Author's Self Archiving Policies, I confirm this Work has not been accepted for publication elsewhere, is not being considered for publication elsewhere and does not duplicate material already published. I confirm all authors consent to publication of this Work and authorise the granting of this licence.

1  
2  
3 1 **Title**  
4

5 2 Association of short-term exposure to ambient PM<sub>2.5</sub> with hospital admissions and 30-day  
6  
7 3 readmissions in end-stage renal disease patients: population based retrospective cohort study  
8  
9 4

10  
11 5 **Author's names**  
12

13 6 Lauren H Wyatt (0000-0002-4926-2058), Yuzhi Xi, Abhijit V Kshirsagar, Qian Di (0000-0002-  
14  
15 7 1584-4770), Cavin Ward-Caviness (0000-0002-6322-4349), Timothy J Wade, Wayne E Cascio,  
16  
17 8 Ana G Rappold (0000-0002-7696-0900)  
18  
19 9

20  
21  
22 10 **Author's addresses and positions**  
23

24 11 Center for Public Health and Environmental Assessment, Office of Research and Development,  
25  
26 12 United States Environmental Protection Agency, Research Triangle Park, NC, USA Lauren H  
27  
28 13 Wyatt postdoctoral research fellow  
29

30 14 Oak Ridge Institute for Science and Education at the United States Environmental Protection  
31  
32 15 Agency, Research Triangle Park, NC, USA Yuzhi Xi doctoral student  
33

34 16 University of North Carolina Kidney Center and Division of Nephrology and Hypertension, UNC  
35  
36 17 at Chapel Hill, Chapel Hill, NC, USA Abhijit V Kshirsagar nephrologist  
37

38 18 Research Center for Public Health, School of Medicine, Tsinghua University, Beijing, China  
39  
40 19 Qian Di assistant professor  
41  
42 20

43 21 Center for Public Health and Environmental Assessment, Office of Research and Development,  
44  
45 22 United States Environmental Protection Agency, Research Triangle Park, NC, USA Cavin  
46  
47 23 Ward-Caviness computational biologist  
48

49 24 Center for Public Health and Environmental Assessment, Office of Research and Development,  
50  
51 25 United States Environmental Protection Agency, Research Triangle Park, NC, USA Timothy J  
52  
53 26 Wade supervisory health scientist  
54  
55  
56  
57  
58  
59  
60

1  
2  
3 26 Center for Public Health and Environmental Assessment, Office of Research and Development,  
4  
5 27 United States Environmental Protection Agency, Research Triangle Park, NC, USA Wayne E  
6  
7 28 Cascio supervisory health scientist  
8  
9 29 Center for Public Health and Environmental Assessment, Office of Research and Development,  
10  
11 30 United States Environmental Protection Agency, Research Triangle Park, NC, USA Ana G  
12  
13 31 Rappold statistician  
14  
15  
16 32

17  
18 33 **Corresponding author**

19  
20 34 Correspondence to: Ana G Rappold rappold.ana@epa.gov, 919-843-9504, 109 TW Alexander  
21  
22 35 Drive, Mailbox 58B, Research Triangle Park, NC 27709  
23  
24 36

25  
26 37 Manuscript word count: 3159

27  
28 38 Abstract word count: 298  
29  
30  
31 39

32  
33 40 **Abstract**

34  
35 41 **Objectives:** To examine the effect of short-term exposure to ambient fine particulate matter  
36  
37 42 (PM<sub>2.5</sub>) on all-cause, cardiovascular, and respiratory related hospital admissions and  
38  
39 43 readmissions among patients receiving outpatient hemodialysis.  
40

41 44 **Design:** Retrospective cohort study.

42  
43 45 **Setting:** Inpatient hospitalization claims identified from the United States Renal Data System in  
44  
45 46 530 US counties.

46  
47 47 **Participants:** All patients receiving in-center hemodialysis between 2008 and 2014.

48  
49 48 **Primary and secondary outcome measures:** Risk of all-cause, cardiovascular, and  
50  
51 49 respiratory related hospital admissions and 30-day all-cause and cause-specific readmission  
52  
53 50 following an all-cause, cardiovascular, and respiratory related discharges. Readmission risk was  
54  
55  
56  
57  
58  
59  
60

1  
2  
3 51 evaluated for early (1-7 days post-discharge) and late (8-30 days post-discharge) readmission  
4  
5 52 time-periods. Relative risk is expressed per 10  $\mu\text{g}/\text{m}^3$  of  $\text{PM}_{2.5}$ .  
6

7 53 **Results:** Same day ambient  $\text{PM}_{2.5}$  was associated with increased hospital admission risk for  
8  
9 54 cardiovascular causes (0.8%, 95%CI: [0.1, 1.5]). Greater  $\text{PM}_{2.5}$ -related associations were  
10  
11 55 observed with 30-day readmission risk. All-cause readmission risk associated with  $\text{PM}_{2.5}$  was  
12  
13 56 greater for early-readmissions compared to late-readmissions. Early-readmission risk was  
14  
15 57 increased by 1.4-1.7% following all-cause (1.4%, [0.5, 2.4]), cardiovascular (1.7%, [0.4, 3.1]),  
16  
17 58 and respiratory (1.6%, [0.2, 3.1]) discharges; while late-readmission risk increased by 0.3%  
18  
19 59 following all-cause and cardiovascular discharges.  $\text{PM}_{2.5}$ -related associations with readmission  
20  
21 60 risk were greatest for certain cause-specific readmissions ranging 1.8-7.6% for dysrhythmia and  
22  
23 61 conduction disorder, heart failure, COPD, other non-cardiac chest pain or respiratory syndrome,  
24  
25 62 and pneumonia. Following all-cause discharges, the cause-specific early-readmission risk was  
26  
27 63 increased by 6.1% (3.2, 9.2) for pneumonia, 4.6% (2.1, 7.1) for dysrhythmia and conduction  
28  
29 64 disorder, 3.6% (1.3, 5.9) for heart failure, and 2.7% (1.1, 4.2) for other non-cardiac chest pain or  
30  
31 65 respiratory syndrome related causes.  
32  
33

34 66 **Conclusions:** Daily ambient  $\text{PM}_{2.5}$  was associated with an increased risk of cardiovascular  
35  
36 67 admissions and 30-day readmissions following cardiopulmonary-related discharges in a  
37  
38 68 vulnerable ESRD population. In the first week following discharge, greater  $\text{PM}_{2.5}$ -related risk of  
39  
40 69 rehospitalization was identified for some diagnoses.  
41  
42  
43  
44

#### 45 71 **Strengths and limitations of this study**

- 46 72 • Hospitalization records for patients undergoing in-center hemodialysis between 2008  
47  
48 73 and 2014 were identified using the US Renal Data System (> 1.8 million inpatient  
49  
50 74 admissions).
- 51 75 • Fine resolution daily air pollution was linked to the location of the last dialysis visit.  
52  
53  
54  
55  
56  
57  
58  
59  
60

- 1  
2  
3 76 • The time-stratified design in the admissions analysis reduced the potential confounding  
4  
5 77 by factors that vary slowly with time and those that are time-invariant.  
6  
7 78 • Using time-dependent risk factors in the Cox proportional hazard model allowed for  
8  
9 79 readmission risk estimates to reflect the risk associated with daily fluctuations in ambient  
10  
11 80 PM<sub>2.5</sub> and time-varying confounders.  
12  
13  
14 81 • This study uses ambient air quality near dialysis centers to estimate individual exposure  
15  
16 82 and diagnosis codes to classify cause-specific hospitalizations, which could contribute to  
17  
18 83 exposure and diagnosis misclassification.  
19  
20 84

## 85 Introduction

86 Ambient fine particulate matter (PM<sub>2.5</sub>) is a leading risk factor for all-cause mortality<sup>1-4</sup>,  
87 accounting for millions of premature deaths each year<sup>5</sup>. Daily variation in ambient PM<sub>2.5</sub> is also  
88 associated with increased rates of unplanned hospital admissions, urgent care visits, and  
89 medication usage<sup>6,7</sup>. Greater health impacts have been observed consistently in sensitive  
90 populations, including the elderly and individuals with chronic health conditions<sup>3,8-10</sup>; however,  
91 few studies to our knowledge have examined PM<sub>2.5</sub>-related health impacts on specific chronic  
92 health conditions, such as individuals living with chronic kidney disease (CKD).

94 CKD is a progressive condition that affects 8 to 16% of the population worldwide<sup>11-13</sup>, and in the  
95 final stage, end-stage renal disease (ESRD), many patients are transitioned to hemodialysis to  
96 prolong life. Patients receiving dialysis represent a particularly vulnerable population because of  
97 high rates of co-morbidities, including diabetes and cardiovascular disease, which may  
98 contribute to the greater likelihood of hospital admission and readmission following PM  
99 exposure. In the US, patients on hemodialysis average 1.7 inpatient admissions annually with a  
100 30-day readmission rate twice that of other Medicare beneficiaries<sup>14</sup>, contributing to a  
101 substantial economic impact<sup>15</sup>. In 2016, \$35.4 billion in Medicare fee-for-service costs were  
102 attributed to ESRD<sup>14</sup>, motivating health promotion and cost-containment efforts to slow the  
103 progression of CKD and reduce hospitalizations and readmissions<sup>16</sup>. While many current  
104 strategies to reduce hospitalizations focus on care processes and patient-level factors<sup>17-20</sup>,  
105 there is a knowledge gap on the role of modifiable environmental risk factors - specifically  
106 ambient PM<sub>2.5</sub><sup>2,21-23</sup>.

108 In this study, we examined the risk of daily hospitalization and subsequent 30-day readmission  
109 in relation to daily ambient PM<sub>2.5</sub> using data from the US Renal Data System (USRDS) over a 7-  
110 year period. We focused on all-cause, cardiovascular, and respiratory hospitalizations and



1  
2  
3 111 estimated changes in risk for early (1 to 7 days post-discharge) and late (8 to 30 days post-  
4  
5 112 discharge) readmission accounting for the influence of different causal factors (i.e. acute and  
6  
7 113 chronic illness burden) that may influence early versus late-readmissions<sup>24 25</sup>.  
8  
9  
10 114

## 11 115 **Methods**

### 12 116 **Setting and study population**

13  
14 117 Using patient level data from the USRDS, we constructed an open cohort of individuals  
15  
16 118 receiving in-center hemodialysis between 2008 and 2014. USRDS is a national data registry for  
17  
18 119 dialysis services and includes records of patient demographic characteristics, hospitalizations,  
19  
20 120 and provider information on all patients receiving hemodialysis. Baseline demographic  
21  
22 121 characteristics (sex, birth date, race, and smoking status) recorded at the initiation of dialysis  
23  
24 122 were extracted from the Medical Evidence Form CMS-2728 for each patient. For every inpatient  
25  
26 123 hospital visit, we extracted the admission date, discharge date, discharge diagnoses codes, and  
27  
28 124 discharge status.  
29  
30  
31  
32

33 125  
34  
35 126 For the analysis of 30-day readmission risk, we considered only admissions where patients  
36  
37 127 were discharged alive. Each readmission was counted once as a readmission relative to the  
38  
39 128 prior index admissions and was then considered as a new index admission. Thus, each  
40  
41 129 admission could serve as both an index admission and readmission, consistent with previous  
42  
43 130 studies<sup>26</sup>. An admission that occurred on the same day as a discharge was combined with the  
44  
45 131 previous admission. These readmissions are likely to represent facility transfers for which we  
46  
47 132 were not able to obtain information. Admissions occurring within 30 days of the end of the study  
48  
49 133 period were excluded, as 30 days of follow-up data were not available. For both admissions and  
50  
51 134 readmissions, patients could be represented more than once if they were admitted multiple  
52  
53 135 times during the study period.  
54  
55  
56 136

1  
2  
3 137 Health outcomes  
4

5 138 The primary outcomes included daily counts of all-cause, respiratory, and cardiovascular-related  
6  
7 139 admissions and the time to readmission following the cause-specific discharges. All-cause and  
8  
9 140 cause-specific readmissions were examined separately. Readmissions were classified further  
10  
11 141 as early-readmissions, occurring within 1 to 7 days of an index hospitalization discharge, and  
12  
13 142 late-readmissions, occurring 8 to 30 days post-discharge.  
14  
15

16 143  
17  
18 144 International Classification of Diseases, 9<sup>th</sup> Revision (ICD-9) codes were used to identify cause-  
19  
20 145 specific hospitalizations. Cardiovascular-related diagnoses included hypertension (ICD-9 codes  
21  
22 146 401-405), myocardial infarction (410), ischemic heart disease (410-411, 413), pulmonary  
23  
24 147 embolism (415), dysrhythmia and conduction disorder (426-427), heart failure (428), and  
25  
26 148 peripheral arterial disease (444). Respiratory-related diagnoses included asthma (493), chronic  
27  
28 149 obstructive pulmonary disease (491-492, 496), pneumonia (480-486), and other non-cardiac  
29  
30 150 chest pain or respiratory syndrome (786).  
31  
32

33 151

34  
35 152 Environmental data  
36

37 153 Daily concentrations of fine particulate matter (PM<sub>2.5</sub>) were estimated using a previously  
38  
39 154 described exposure prediction model<sup>27 28</sup>. Briefly, this model estimates daily PM<sub>2.5</sub> on a 1 km  
40  
41 155 grid for the entire continental US by incorporating satellite aerosol optical depth measurements,  
42  
43 156 chemical transport model simulations, meteorology, land-use, and other variables. Gridded  
44  
45 157 PM<sub>2.5</sub> estimates were subsequently converted to population-weighted county-level estimates  
46  
47 158 using 2010 Census tract population values. To enable adjustment for potential confounding by  
48  
49 159 weather conditions, temperature and relative humidity data were obtained from the National  
50  
51 160 Centers for Environmental Information's Global Historical Climatology Network (Global Surface  
52  
53 161 Summary of the Day)<sup>29</sup> and using the Community Multiscale Air Quality model, respectively.  
54  
55  
56  
57  
58  
59  
60

162 The study area was restricted to all counties containing at least one land surface station from  
163 the Global Historical Climatology Network (n = 530).

164  
165 Daily PM<sub>2.5</sub> was linked to patient hospitalizations based on the county of their last dialysis visit.  
166 Previous work has shown that patients in the USRDS cohort that receive in-center dialysis three  
167 times a week have a median travel distance of 5.7 miles to their initial dialysis center <sup>30 31</sup>.

168  
169 Study design and statistical analysis

170 *Daily county hospital admissions.* The relative risks of hospital admissions associated with daily  
171 PM<sub>2.5</sub> were estimated using a case-crossover design with conditional Poisson models for each  
172 of the three health outcomes separately (all-cause, cardiovascular, respiratory). Aggregated  
173 counts of daily admissions were time stratified by county-day, where each county served as its  
174 own control. For each county-day strata, PM<sub>2.5</sub> on the day of admission was compared with  
175 PM<sub>2.5</sub> concentrations on control days. Control days were defined as occurring on the same day  
176 of the week in the same month and year. This, by design, enabled us to control for differences  
177 in county characteristics, such as population size and risk characteristics, and the influence of  
178 day of the week, seasonal, and long-term time trends <sup>32</sup>.

179  
180 The relative risk of hospital admissions related to daily PM<sub>2.5</sub> for each health outcome was  
181 estimated using daily counts with respect to county-time strata, adjusted for meteorological  
182 conditions (temperature and humidity). Temperature and humidity effects were averaged over  
183 lag days 0, 1, and 2 and modeled using natural splines (df = 3) to allow for non-linear effects <sup>33</sup>.

184  
185 We evaluated immediate (same day) and delayed PM<sub>2.5</sub> effects on all-cause and cause-specific  
186 hospital admissions. Unconstrained distributed lag models were used to assess the delayed  
187 effects of short-term exposures to PM<sub>2.5</sub>. Delayed exposure up to 14 days were considered.

1  
2  
3 188  
4  
5 189 *Early and late readmissions occurring within 30 days of discharge.* Cox proportional hazards  
6  
7 190 models were used to assess the relative risk of early (1 to 7 days post-discharge) and late (8 to  
8  
9 191 30 days post-discharge) readmission associated with daily PM<sub>2.5</sub> following all-cause and cause-  
10  
11 192 specific index hospitalizations. Early-readmission models were censored at 7 days and late-  
12  
13 193 readmission models at 30 days.

14  
15  
16 194  
17  
18 195 Models for readmissions incorporated both time-dependent and time-independent risk factors.  
19  
20 196 Time-dependent variables included daily PM<sub>2.5</sub>, daily temperature, daily relative humidity, and  
21  
22 197 day-of-the-week. Time-independent factors included patient-specific and hospitalization event-  
23  
24 198 specific variables. Patient-specific variables included indicator of sex, race, baseline smoking  
25  
26 199 status, whether the patient had three or more previous hospital visits in the year prior, and age  
27  
28 200 at discharge. Event-specific variables included whether the discharge occurred on a holiday and  
29  
30 201 length of stay. Lastly, models were adjusted for patient-specific clusters to account for repeated  
31  
32 202 measures by individual.

33  
34  
35 203  
36  
37 204 Daily county admission and readmission risks were expressed as the rate ratio (RR) per 10-  
38  
39 205 µg/m<sup>3</sup> increase in PM<sub>2.5</sub>. The proportion hospital admissions and readmissions associated with  
40  
41 206 PM<sub>2.5</sub> is reported as the attributable fraction (AF), where  $AF = (RR-1) / RR$  <sup>34</sup>. All statistical  
42  
43 207 analyses were performed with R software (version 3.6.0) <sup>35</sup>.

44  
45 208

## 46 47 209 **Results**

48  
49 210 Characterization of clinical cohort and daily PM<sub>2.5</sub>

50  
51 211 Among 361,568 patients who were hospitalized during the study period, 10,274 were excluded  
52  
53 212 due to missing baseline demographic values, with 351,294 patients remaining. Demographic  
54  
55 213 descriptions are in Table 1. Patients had on average 2.97 hospital visits in the year prior to an

214 admission and more than 70% of patients had at least one hospital admission related to  
215 cardiovascular and respiratory causes (Table 2). The average daily county-level PM<sub>2.5</sub>  
216 concentration was 9.3 µg/m<sup>3</sup> (range: 0.05 to 155.16 µg/m<sup>3</sup>) (Table S1).

217

218 Description of clinical events, hospital admissions, and readmissions

219 In total, there were 1,801,966 hospital admissions, of which 1,493,795 recorded the patient as  
220 alive at discharge. Of admissions that were discharged alive, 11.9% were readmitted within 7  
221 days and 21.4% were readmitted 8 to 30 days post-discharge. The mean length of stay for all-  
222 cause, cardiovascular, and respiratory admissions was 7.0, 7.0, and 7.1 days, respectively  
223 (Table 2).

224

225 Associations between PM<sub>2.5</sub> and readmission

226 *Early-readmission.* Daily PM<sub>2.5</sub> was positively associated with increased risk for early-  
227 readmission following all-cause, cardiovascular, and respiratory related discharges. Same day  
228 (lag 0) PM<sub>2.5</sub> was associated with a 1.4% (95%CI: 0.5, 2.4), 1.7% (95%CI: 0.4, 3.1), and 1.6%  
229 (95%CI: 0.2, 3.1) increased risk of an early-readmission for any cause following all-cause,  
230 cardiovascular, and respiratory related discharges, respectively (Figure 1, Table S3).

231

232 PM<sub>2.5</sub> associated early-readmission risk was greater for certain cause-specific outcomes.

233 Following all-cause discharges, same day (lag 0) PM<sub>2.5</sub> was associated with increased early-  
234 readmission risk for dysrhythmia and conduction disorder (4.6% [2.1, 7.1]), heart failure (3.6%  
235 [1.3, 5.9]), pneumonia 6.1% [3.2, 9.2]), and other non-cardiac chest pain or respiratory  
236 syndrome (2.7% [1.1, 4.2]) causes. PM<sub>2.5</sub> associated early-readmission risk was greatest for  
237 pneumonia related readmissions following cardiovascular related discharges (7.6% [3.6, 11.7]).

238 Other cause-specific early-readmission risks following cardiovascular and respiratory related

1  
2  
3 239 discharges were similar to estimates observed following discharge for any cause (Figure 2,  
4  
5 240 Table S4).

6  
7 241  
8  
9 242 An average AF at 10  $\mu\text{g}/\text{m}^3$  of  $\text{PM}_{2.5}$  at lag 0 was 1.4% (95%CI: 0.5, 2.4), 1.7% (95%CI: 0.3,  
10  
11 243 3.0), and 1.6% (95%CI: 0.2, 3.0) for an early-readmission following all-cause, cardiovascular,  
12  
13 244 and respiratory discharges, respectively (Figure 1). County AF ranged 0.5% to 2.3%, 0.6% to  
14  
15 245 2.7%, and 0.5% to 2.6% for an early-readmission following all-cause, cardiovascular, and  
16  
17 246 respiratory related discharges, respectively (Figure 2).

18  
19  
20 247  
21  
22 248 *Late-readmission.* Daily  $\text{PM}_{2.5}$  was also associated with increased risk of late-readmission  
23  
24 249 following all-cause, cardiovascular, and respiratory related discharges, though the magnitude of  
25  
26 250 risk related to all-cause readmissions was smaller than that observed with early-readmission.  
27  
28 251 Same day  $\text{PM}_{2.5}$  was associated with a 0.3% (95%CI: 0.1, 0.5) and 0.3% (95%CI: 0.1, 0.6)  
29  
30 252 increased risk of a late all-cause readmission following all-cause and cardiovascular related  
31  
32 253 discharges, respectively (Figure 1, Table S3).

33  
34 254  
35  
36 255 Similar to observations made for early-readmissions,  $\text{PM}_{2.5}$  associated late-readmission risk was  
37  
38 256 greater for certain cause-specific outcomes. Following all-cause discharges, a 10  $\mu\text{g}/\text{m}^3$   
39  
40 257 increase in same day (lag 0)  $\text{PM}_{2.5}$  was associated with increased late-readmission risk for  
41  
42 258 dysrhythmia and conduction disorder (2.5% [1.5, 3.6]), heart failure (3.7% [2.7, 4.7]), COPD  
43  
44 259 (2.2% [0.4, 3.9]), pneumonia (4.6% [3.3, 5.8]), and other non-cardiac chest pain or respiratory  
45  
46 260 syndrome (3.5% [2.9, 4.1]). Other cause-specific early-readmission risks following  
47  
48 261 cardiovascular and respiratory related discharges were similar to estimates observed following  
49  
50 262 discharge for any cause (Figure 2, Table S4).

51  
52  
53  
54 263  
55  
56  
57  
58  
59  
60

1  
2  
3 264 The average AF at 10  $\mu\text{g}/\text{m}^3$  was 0.3% (95%CI: 0.1, 0.5) and 0.3% (95%CI: 0.1, 0.6) for a late-  
4  
5 265 readmission following all-cause and cardiovascular discharges, respectively (Figure 1). County  
6  
7 266 AF ranged 0.1% to 0.5% for a late-readmission following any cause (data not shown).  
8  
9  
10 267

#### 11 268 Associations between $\text{PM}_{2.5}$ and daily admissions

12  
13  
14 269 Same day  $\text{PM}_{2.5}$  was associated with an increase in rate ratio of 0.3% (95%CI: -0.2, 0.9) for all-  
15  
16 270 cause admissions and 0.9% (95%CI: 0.2, 1.7) for cardiovascular admissions (Figure S2, Table  
17  
18 271 S2). We estimated 0.9% (95%CI: 0.1, 1.7) of cardiovascular admissions could be attributed to  
19  
20 272 10  $\mu\text{g}/\text{m}^3$  ambient  $\text{PM}_{2.5}$  (Figure 3). Across counties, exposures accounted for 0.3% to 1.5% of  
21  
22 273 cardiovascular admissions when evaluated at the average daily  $\text{PM}_{2.5}$  for each county (data not  
23  
24 274 shown).  
25  
26  
27 275

28  
29 276 No change in risk of all-cause and cardiovascular admissions was observed related to prior  
30  
31 277 exposure (lags 1-14). Similarly, no change in risk for respiratory admissions was observed with  
32  
33 278 same day exposure (lag 0) or prior exposure (lags 1-14) (Figure S2, Table S2).  
34  
35 279

## 36 37 280 Discussion

38  
39 281 In a nationwide cohort study of 351,294 patients with ESRD managed with hemodialysis, we  
40  
41 282 evaluated the association between 1.8 million inpatient admissions and nearly 0.5 million  
42  
43 283 corresponding 30-day readmissions and the variation in daily ambient  $\text{PM}_{2.5}$  in the US over 7  
44  
45 284 years, 2008-2014. Daily variation in  $\text{PM}_{2.5}$  was associated with increased risk of hospital  
46  
47 285 admission and even greater risk of rehospitalization. We found that the rehospitalization risk  
48  
49 286 related to readmission for any cause was 4.7-8.0 times greater for readmission in the first week  
50  
51 287 following discharge, compared to late-readmissions (8-30d after discharge). Following all-cause,  
52  
53 288 cardiovascular, and respiratory related discharges, the early-readmission risk for any cause was  
54  
55 289 increased by 1.4, 1.7, 1.6%, respectively per 10  $\mu\text{g}/\text{m}^3$  increase in daily  $\text{PM}_{2.5}$ . Importantly,  
56  
57  
58  
59  
60

1  
2  
3 290 readmissions related to some cardiorespiratory diagnoses had the greatest PM<sub>2.5</sub> attributed  
4  
5 291 readmission risk that was observed to be elevated for both early and late-readmissions. The  
6  
7 292 early-readmission risk following all-cause discharges, was increased by 6.1%, 4.6%, and 3.6%  
8  
9 293 for pneumonia, dysrhythmia and conduction disorder, and heart failure related readmissions,  
10  
11 294 respectively. Most notably for readmissions related to pneumonia and dysrhythmia, the early-  
12  
13 295 readmission risk attributed to PM<sub>2.5</sub> was nearly twice as large as the late-readmission risk.  
14  
15 296 Overall, these results suggest that at 10 µg/m<sup>3</sup>, 1.4-1.7% of early-readmissions for any cause  
16  
17 297 were attributable to short-term exposure. In the context of the daily PM<sub>2.5</sub> National Ambient Air  
18  
19 298 Quality Standard (35 µg/m<sup>3</sup>), this attributable fraction would be 5-6%.  
20  
21  
22 299

23  
24 300 Our findings are consistent with previous studies that observed increased admission risks in  
25  
26 301 elderly populations <sup>6 9 36-40</sup> and patients with cardiovascular health complications <sup>7 41</sup>, and  
27  
28 302 increased readmission risk following cardiovascular related admissions <sup>7 41 42</sup>. Studies in the  
29  
30 303 Medicare population similarly observed a 1-2% increase in cardiovascular hospital admissions  
31  
32 304 associated with same-day PM<sub>2.5</sub> concentrations <sup>6 9 36 38</sup>. Risk appears to vary by diagnosis, as  
33  
34 305 the increased risk was slightly less (0.13%) for ST-elevation myocardial infarction related  
35  
36 306 admissions in a Chinese population <sup>7</sup> and greater (29%) for incident heart failure admissions in  
37  
38 307 an Australian population <sup>41</sup>. Increases in respiratory admissions (1-2%) have been noted in the  
39  
40 308 Medicare population <sup>6 9 36-38</sup>, but were not observed in this study. Prior studies provide evidence  
41  
42 309 that air pollution exposure is associated with adverse health outcomes including increased  
43  
44 310 infection rates, acute lung edema, and elevated concentrations of systematic inflammation  
45  
46 311 markers <sup>43-45</sup>. Despite known associations between PM exposure and adverse cardiovascular  
47  
48 312 and respiratory health outcomes, previous studies have not evaluated the impacts on hospital  
49  
50 313 readmissions among individuals with ESRD.  
51  
52  
53

54 314  
55  
56  
57  
58  
59  
60



1  
2  
3 315 Few studies have examined PM<sub>2.5</sub>-related effects on readmissions, and those that have report  
4  
5 316 on the long-term (>1yr) risk following cardiovascular related admissions. Following  
6  
7 317 cardiovascular hospitalization, PM<sub>2.5</sub>-related rehospitalization risks were greater for cardiac  
8  
9 318 readmissions compared to our observations of all-cause readmissions (1.3-2.6% vs 0.3%)<sup>7 42</sup>.  
10  
11 319 Additionally, one study in an Australian population with very low ambient air pollution  
12  
13 320 concentrations (mean PM<sub>2.5</sub> = 2.9 µg/m<sup>3</sup>) found no relationship between PM<sub>2.5</sub> and the all-cause  
14  
15 321 readmissions after an incident heart failure hospitalization<sup>41</sup>. Short-term readmission risks were  
16  
17 322 greater in comparison to the long-term readmission risks, suggesting the week following a  
18  
19 323 discharge to be a window of heightened vulnerability. Prior work indicates that factors related to  
20  
21 324 index hospitalizations and acute illness burden were predictive of an early-readmission<sup>24 25</sup>.  
22  
23  
24 325 This may indicate that hospital readmissions related to acute illness burdens may be more  
25  
26 326 susceptible to PM<sub>2.5</sub> exposure.  
27

28  
29 327  
30  
31 328 Our study contributes to the currently limited literature on the association between air pollution  
32  
33 329 and health impacts among hemodialysis patients and shines a light on the vulnerability in this  
34  
35 330 clinical population related to ambient airborne particulate matter. The 30-day rehospitalization  
36  
37 331 rate is 35% in this population, which is twice that of older Medicare beneficiaries without a  
38  
39 332 kidney disease diagnosis<sup>14</sup>. As many as 70% of readmissions are thought to be unnecessary<sup>46</sup>,  
40  
41 333 prompting efforts to improve outcomes. Economic healthcare costs associated with short-term  
42  
43 334 increases in PM<sub>2.5</sub> are considerable; annual inpatient and post-acute care costs related to a 10  
44  
45 335 µg/m<sup>3</sup> in daily PM<sub>2.5</sub> ranges \$30-70 million for cardiovascular and respiratory related diseases<sup>47</sup>.  
46  
47 336 PM<sub>2.5</sub> is a modifiable risk factor and reductions in short-term exposures could contribute to  
48  
49 337 reduced healthcare costs. Our findings suggest that short-term increases in PM<sub>2.5</sub> contribute to  
50  
51 338 healthcare usage through unplanned admissions and readmissions.  
52

53  
54 339

55  
56 340 Strengths and Limitations  
57

1  
2  
3 341 This study included a nearly complete cohort of US patients undergoing in-center hemodialysis.  
4  
5 342 To our knowledge this is the largest analysis of short-term exposure to air pollution in the US in  
6  
7 343 this highly vulnerable population. The USRDS registry provides a complete registry of all  
8  
9 344 hospitalizations and contains detailed information regarding demographics, dialysis,  
10  
11 345 hospitalization, rehospitalization, and co-morbid conditions. Secondly, ambient PM<sub>2.5</sub> was  
12  
13 346 estimated using a prediction model with highly resolved spatial and temporal resolution with  
14  
15 347 proven accuracy<sup>27 28</sup>. Thirdly, the time-stratified design allowed for county matching that  
16  
17 348 reduced the potential confounding by factors that very slowly with time and those that are time-  
18  
19 349 invariant. Fourthly, the use of time-dependent risk factors in the Cox proportional hazard model  
20  
21 350 allowed for readmission risk estimates to reflect the risk associated with daily fluctuations in  
22  
23 351 ambient PM<sub>2.5</sub> and time-varying confounders.  
24  
25  
26  
27

28 352  
29 353 This study also had some limitations. Firstly, there was the potential for exposure  
30  
31 354 misclassification as the location of the last dialysis visit was used to estimate individual level  
32  
33 355 exposures. PM<sub>2.5</sub> around dialysis centers could differ from concentrations around hospitals and  
34  
35 356 patient residences. However, given that patients generally reside less than 6 miles from their  
36  
37 357 initial dialysis center, differences in temporal variation of exposure should be small and not likely  
38  
39 358 to contribute a systematic bias favoring an association between ambient PM<sub>2.5</sub> and clinical  
40  
41 359 events<sup>30 31</sup>. Secondly, diagnosis misclassification was possible but was not likely to confound  
42  
43 360 the relationship because it is not likely to vary on the same temporal scale as PM<sub>2.5</sub>. Thirdly,  
44  
45 361 there is the possibility that some unmeasured time variant factors may have confounded our  
46  
47 362 estimates (smoking status, medication usage, behaviors). Data availability restricted the  
48  
49 363 consideration of some patient level confounders, such as smoking status, to values recorded at  
50  
51 364 baseline. Lastly, generalization of the results is limited to the Medicare population with ESRD  
52  
53 365 managed with hemodialysis treatments. Future studies are needed to understand PM<sub>2.5</sub>-related  
54  
55  
56  
57  
58  
59  
60

1  
2  
3 366 impacts on specific health conditions, and if health impacts vary based on race, socioeconomic  
4  
5 367 indicators, or other individual and population factors.  
6

7 368

9 369 **Conclusion**

11 370 In conclusion, this United States wide cohort study identified increased risk in patients receiving

13 371 in-center hemodialysis associated with short-term increases in ambient air particle pollution.

15 372 Elevated PM<sub>2.5</sub> concentrations were found to be associated with increased inpatient hospital

17 373 admissions related to cardiovascular causes, and an increased likelihood of hospital

19 374 readmission following cardiovascular and respiratory related hospitalizations. Medicare

21 375 spending for beneficiaries with ESRD is high. Traditional efforts to reduce the burden of disease

23 376 focus on patient factors; however, these data suggest that air particle pollution is a factor that

25 377 contributes to increased risks for hospital admission and subsequent readmission. To reduce

27 378 PM<sub>2.5</sub>-related morbidities, we echo the recommendations made in the Million Hearts initiative,

29 379 that healthcare systems, insurers, physicians, and health care professionals should

31 380 incorporate health risks related to ambient PM into patient care.  
32

33 381

35 382 **Disclaimer**

37 383 The research described in this article has been reviewed by the Center for Public Health and the

39 384 Environment, U.S. Environmental Protection Agency, and approved for publication. Approval

41 385 does not signify that the contents necessarily reflect the views and policies of the Agency, nor

43 386 does the mention of trade names of commercial products constitute endorsement or

45 387 recommendation for use.  
46

47 388

49 389 **Acknowledgements**

51 390 The patient data reported here have been supplied by the United States Renal Data System

53 391 (USRDS). We are grateful for the high resolution ambient PM<sub>2.5</sub> data provided by Drs. Joel  
54  
55  
56  
57  
58  
59  
60

1  
2  
3 392 Schwartz and Qian Di. The interpretation and reporting of these data are the responsibility of the  
4  
5 393 author(s) and in no way should be seen as an official policy or interpretation of the U.S.  
6  
7 394 government.  
8

9 395

### 11 396 **Contributors**

13 397 LHW, AGR conceived and designed the study. TJW, WEC, and AVK provided subject expert  
14  
15 398 input into the study design and interpretation of evidence. AVK, QD, and CWC provided access  
16  
17 399 to the data for the study; LHW managed and analyzed the data and AGR oversaw the analysis.  
18  
19 400 LHW and AGR wrote the first draft of the manuscript. LHW, YX, AVK, CWC, TJW, WEC, and  
20  
21 401 AGR critically contributed to the manuscript and approved the final draft. LHW and AGR are the  
22  
23 402 guarantors. The corresponding author attests that all listed authors meet authorship criteria and  
24  
25 403 that no others meeting the criteria have been omitted.  
26  
27  
28  
29

30 404

### 32 405 **Funding**

34 406 This work was supported by an internal US Environmental Protection Agency grant. The source  
35  
36 407 of funding had no role in study design, data collection, analyses, interpretation, and decision to  
37  
38 408 submit the article for publication.  
39  
40

41 409

### 43 410 **Competing Interests**

45 411 All authors have completed the ICMJE uniform disclosure form at  
46  
47 412 [www.icmje.org/coi\\_disclosure.pdf](http://www.icmje.org/coi_disclosure.pdf) and declare: no support from any organisation for the  
48  
49 413 submitted work; no financial relationships with any organisations that might have an interest in  
50  
51 414 the submitted work in the previous three years; no other relationships or activities that could  
52  
53 415 appear to have influenced the submitted work.  
54  
55

56 416

1  
2  
3 417 **Ethical approval**  
4

5 418 This study was reviewed by the institutional review board at the University of North Carolina at  
6  
7 419 Chapel Hill and determined to be exempt based on the study design involving secondary data  
8  
9 420 analysis.  
10

11 421

12  
13  
14 422 **Data sharing**

15  
16 423 Data access to USRDS data sets is through an internal data use agreement with the University  
17  
18 424 of North Carolina at Chapel Hill's Cecil G. Sheps Center. PM<sub>2.5</sub> data was obtained through  
19  
20 425 collaboration with Drs. Joel Schwartz (Harvard TH Chan School of Public Health) and Qian Di  
21  
22 426 (Tsinghua University). For general data sharing inquiries, contact [rappold.ana@epa.gov](mailto:rappold.ana@epa.gov) or  
23  
24 427 [wyatt.lauren@epa.gov](mailto:wyatt.lauren@epa.gov).  
25

26 428

27  
28 429 **Transparency**

29  
30 430 The lead and corresponding authors (LHW and AGR) affirm that the manuscript is an honest,  
31  
32 431 accurate, and transparent account of the study being reported; that no important aspects of the  
33  
34 432 study have been omitted; and that any discrepancies from the study as planned (and, if  
35  
36 433 relevant, registered) have been explained.  
37

38  
39 434

40  
41 435 **Patient and Public Involvement**

42  
43 436 This study utilized a deidentified database, thus contact with patients was not possible.  
44

45 437

46  
47 438 **Copyright (non-exclusive license)**

48  
49 439 I Ana G Rappold The Corresponding Author of this article contained within the original  
50  
51 440 manuscript which includes any diagrams & photographs within and any related or stand alone  
52  
53 441 film submitted (the Contribution") has the right to grant on behalf of all authors and does grant  
54  
55 442 on behalf of all authors, a licence to the BMJ Publishing Group Ltd and its licencees, to permit  
56  
57

1  
2  
3 443 this Contribution (if accepted) to be published in the BMJ and any other BMJ Group products

4  
5 444 and to exploit all subsidiary rights, as set out in our licence set out at:

6  
7 445 <http://www.bmj.com/about-bmj/resources-authors/forms-policies-and-checklists/copyright-open->

8  
9 446 [access-and-permission-reuse](http://www.bmj.com/about-bmj/resources-authors/forms-policies-and-checklists/copyright-open-access-and-permission-reuse)

10  
11 447

12  
13  
14 448 Please tick one or more boxes as appropriate:

15  
16 449  I am the sole author of the Contribution.

17  
18 450  I am one author signing on behalf of all co-owners of the Contribution.

19  
20 451  The Contribution has been made in the course of my employment and I am signing as  
21  
22 452 authorised by my employer.

23  
24 453  I am a US Federal Government employee acting in the course of my employment.

25  
26 454  I am not a US Federal Government employee, but some or all of my co-authors are.

27  
28 455  I am an employee of the UK Crown\* acting in the course of my employment

29  
30 456  I am not an employee of the UK Crown acting in the course of my employment but some/all  
31  
32 457 of my co-authors are.\*

460 **References**

- 461 1. Cohen AJ, Brauer M, Burnett R, et al. Estimates and 25-year trends of the global burden of disease  
462 attributable to ambient air pollution: an analysis of data from the Global Burden of Diseases  
463 Study 2015. *The Lancet* 2017;389(10082):1907-18. doi: 10.1016/S0140-6736(17)30505-6
- 464 2. Brook RD, Rajagopalan S, Pope CA, 3rd, et al. Particulate matter air pollution and cardiovascular  
465 disease: An update to the scientific statement from the American Heart Association. *Circulation*  
466 2010;121(21):2331-78. doi: 10.1161/CIR.0b013e3181d8e1 [published Online First:  
467 2010/05/12]
- 468 3. Shi L, Zanobetti A, Kloog I, et al. Low-Concentration PM2.5 and Mortality: Estimating Acute and  
469 Chronic Effects in a Population-Based Study. *Environ Health Perspect* 2016;124(1):46-52. doi:  
470 10.1289/ehp.1409111 [published Online First: 2015/06/04]
- 471 4. Kloog I, Ridgway B, Koutrakis P, et al. Long- and short-term exposure to PM2.5 and mortality: using  
472 novel exposure models. *Epidemiology (Cambridge, Mass)* 2013;24(4):555-61. doi:  
473 10.1097/EDE.0b013e318294beaa [published Online First: 2013/05/17]
- 474 5. WHO WHO. Country estimates of burden of disease from ambient air pollution for 2016, 2018.
- 475 6. Dominici F, Peng RD, Bell ML, et al. Fine particulate air pollution and hospital admission for  
476 cardiovascular and respiratory diseases. *Jama* 2006;295(10):1127-34. doi:  
477 10.1001/jama.295.10.1127 [published Online First: 2006/03/09]
- 478 7. Liu H, Tian Y, Cao Y, et al. Fine particulate air pollution and hospital admissions and readmissions for  
479 acute myocardial infarction in 26 Chinese cities. *Chemosphere* 2018;192:282-88. doi:  
480 10.1016/j.chemosphere.2017.10.123 [published Online First: 2017/11/07]
- 481 8. Di Q, Dai L, Wang Y, et al. Association of Short-term Exposure to Air Pollution With Mortality in Older  
482 Adults Association of Short-term Exposure to Air Pollution With Mortality in Older  
483 Adults Association of Short-term Exposure to Air Pollution With Mortality in Older Adults. *JAMA*  
484 2017;318(24):2446-56. doi: 10.1001/jama.2017.17923
- 485 9. Bravo MA, Ebisu K, Dominici F, et al. Airborne Fine Particles and Risk of Hospital Admissions for  
486 Understudied Populations: Effects by Urbanicity and Short-Term Cumulative Exposures in 708  
487 U.S. Counties. *Environ Health Perspect* 2017;125(4):594-601. doi: 10.1289/ehp257 [published  
488 Online First: 2016/09/21]
- 489 10. Simoni M, Baldacci S, Maio S, et al. Adverse effects of outdoor pollution in the elderly. *J Thorac Dis*  
490 2015;7(1):34-45. doi: 10.3978/j.issn.2072-1439.2014.12.10
- 491 11. Coresh J, Selvin E, Stevens LA, et al. Prevalence of chronic kidney disease in the United States. *Jama*  
492 2007;298(17):2038-47. doi: 10.1001/jama.298.17.2038 [published Online First: 2007/11/08]
- 493 12. Hsu CY, Vittinghoff E, Lin F, et al. The incidence of end-stage renal disease is increasing faster than  
494 the prevalence of chronic renal insufficiency. *Annals of internal medicine* 2004;141(2):95-101.  
495 doi: 10.7326/0003-4819-141-2-200407200-00007 [published Online First: 2004/07/21]
- 496 13. Cockwell P, Fisher L-A. The global burden of chronic kidney disease. *The Lancet*  
497 2020;395(10225):662-64. doi: 10.1016/S0140-6736(19)32977-0
- 498 14. USRDS USRDS. 2018 USRDS annual data report: Epidemiology of kidney disease in the United States.  
499 Bethesda, MD: National Institutes of Health, National Institute of Diabetes and Digestive and  
500 Kidney Diseases, 2018.
- 501 15. Wang V, Vilme H, Maciejewski ML, et al. The Economic Burden of Chronic Kidney Disease and End-  
502 Stage Renal Disease. *Seminars in nephrology* 2016;36(4):319-30. doi:  
503 10.1016/j.semnephrol.2016.05.008 [published Online First: 2016/08/01]
- 504 16. Chen TK, Knicely DH, Grams ME. Chronic Kidney Disease Diagnosis and Management: A Review.  
505 *JAMA* 2019;322(13):1294-304. doi: 10.1001/jama.2019.14745

- 1  
2  
3 506 17. Flythe JE, Hilbert J, Kshirsagar AV, et al. Psychosocial Factors and 30-Day Hospital Readmission  
4 507 among Individuals Receiving Maintenance Dialysis: A Prospective Study. *American journal of*  
5 508 *nephrology* 2017;45(5):400-08. doi: 10.1159/000470917 [published Online First: 2017/04/14]  
6 509 18. Perl J, McArthur E, Bell C, et al. Dialysis Modality and Readmission Following Hospital Discharge: A  
7 510 Population-Based Cohort Study. *American journal of kidney diseases : the official journal of the*  
8 511 *National Kidney Foundation* 2017;70(1):11-20. doi: 10.1053/j.ajkd.2016.10.020 [published  
9 512 Online First: 2017/01/11]  
10 513 19. Chan L, Chauhan K, Poojary P, et al. National Estimates of 30-Day Unplanned Readmissions of  
11 514 Patients on Maintenance Hemodialysis. *Clinical journal of the American Society of Nephrology :*  
12 515 *CJASN* 2017;12(10):1652-62. doi: 10.2215/cjn.02600317 [published Online First: 2017/10/04]  
13 516 20. Lin Y, Yang C, Chu H, et al. Association between the Charlson Comorbidity Index and the risk of 30-  
14 517 day unplanned readmission in patients receiving maintenance dialysis. *BMC nephrology*  
15 518 2019;20(1):363. doi: 10.1186/s12882-019-1538-0 [published Online First: 2019/10/09]  
16 519 21. USEPA USEPA. Integrated Science Assessment (ISA) for Particulate Matter, 2009.  
17 520 22. Newby DE, Mannucci PM, Tell GS, et al. Expert position paper on air pollution and cardiovascular  
18 521 disease. *European heart journal* 2014;36(2):83-93. doi: 10.1093/eurheartj/ehu458  
19 522 23. Yusuf S, Joseph P, Rangarajan S, et al. Modifiable risk factors, cardiovascular disease, and mortality in  
20 523 155 722 individuals from 21 high-income, middle-income, and low-income countries (PURE): a  
21 524 prospective cohort study. *Lancet (London, England)* 2020;395(10226):795-808. doi:  
22 525 10.1016/s0140-6736(19)32008-2 [published Online First: 2019/09/08]  
23 526 24. Graham KL, Auerbach AD, Schnipper JL, et al. Preventability of Early Versus Late Hospital  
24 527 Readmissions in a National Cohort of General Medicine Patients. *Annals of internal medicine*  
25 528 2018;168(11):766-74. doi: 10.7326/m17-1724 [published Online First: 2018/05/02]  
26 529 25. Graham KL, Wilker EH, Howell MD, et al. Differences between early and late readmissions among  
27 530 patients: a cohort study. *Annals of internal medicine* 2015;162(11):741-9. doi: 10.7326/m14-  
28 531 2159 [published Online First: 2015/06/02]  
29 532 26. Barrett M RS, Andrews R. Overview of Key Readmission Measures and Methods. 2012. HCUP  
30 533 Methods Series Report #2012-04. U.S. Agency for Healthcare Research and Quality, 2012.  
31 534 27. Makar M, Antonelli J, Di Q, et al. Estimating the Causal Effect of Low Levels of Fine Particulate Matter  
32 535 on Hospitalization. *Epidemiology (Cambridge, Mass)* 2017;28(5):627-34. doi:  
33 536 10.1097/ede.0000000000000690 [published Online First: 2017/08/03]  
34 537 28. Di Q, Kloog I, Koutrakis P, et al. Assessing PM2.5 Exposures with High Spatiotemporal Resolution  
35 538 across the Continental United States. *Environ Sci Technol* 2016;50(9):4712-21. doi:  
36 539 10.1021/acs.est.5b06121 [published Online First: 2016/03/30]  
37 540 29. NOAA. Global Surface Summary of the Day - GSOD. In: National Climatic Data Center N, NOAA, U.S.  
38 541 Department of Commerce, ed.  
39 542 30. Prakash S, Coffin R, Schold J, et al. Travel distance and home dialysis rates in the United States. *Perit*  
40 543 *Dial Int* 2014;34(1):24-32. doi: 10.3747/pdi.2012.00234  
41 544 31. Stephens JM, Brotherton S, Dunning SC, et al. Geographic disparities in patient travel for dialysis in  
42 545 the United States. *The Journal of rural health : official journal of the American Rural Health*  
43 546 *Association and the National Rural Health Care Association* 2013;29(4):339-48. doi:  
44 547 10.1111/jrh.12022 [published Online First: 2013/10/04]  
45 548 32. Carracedo-Martinez E, Taracido M, Tobias A, et al. Case-crossover analysis of air pollution health  
46 549 effects: a systematic review of methodology and application. *Environ Health Perspect*  
47 550 2010;118(8):1173-82. doi: 10.1289/ehp.0901485 [published Online First: 2010/04/02]  
48 551 33. DeFlorio-Barker S, Crooks J, Reyes J, et al. Cardiopulmonary Effects of Fine Particulate Matter  
49 552 Exposure among Older Adults, during Wildfire and Non-Wildfire Periods, in the United States



- 1  
2  
3 553 2008-2010. *Environ Health Perspect* 2019;127(3):37006. doi: 10.1289/ehp3860 [published  
4 554 Online First: 2019/03/16]  
5 555 34. Hildebrandt M, Bender R, Gehrmann U, et al. Calculating confidence intervals for impact numbers.  
6 556 *BMC Med Res Methodol* 2006;6:32. doi: 10.1186/1471-2288-6-32 [published Online First:  
7 557 2006/07/14]  
8 558 35. A language and environment for statistical computing. R Foundation for Statistical Computing  
9 559 [program]. Vienna, Austria, 2019.  
10 560 36. Peng RD, Bell ML, Geyh AS, et al. Emergency admissions for cardiovascular and respiratory diseases  
11 561 and the chemical composition of fine particle air pollution. *Environ Health Perspect*  
12 562 2009;117(6):957-63. doi: 10.1289/ehp.0800185 [published Online First: 2009/07/11]  
13 563 37. Peng RD, Chang HH, Bell ML, et al. Coarse particulate matter air pollution and hospital admissions for  
14 564 cardiovascular and respiratory diseases among Medicare patients. *Jama* 2008;299(18):2172-9.  
15 565 doi: 10.1001/jama.299.18.2172 [published Online First: 2008/05/15]  
16 566 38. Powell H, Krall JR, Wang Y, et al. Ambient Coarse Particulate Matter and Hospital Admissions in the  
17 567 Medicare Cohort Air Pollution Study, 1999-2010. *Environ Health Perspect* 2015;123(11):1152-8.  
18 568 doi: 10.1289/ehp.1408720 [published Online First: 2015/04/15]  
19 569 39. Zanobetti A, Dominici F, Wang Y, et al. A national case-crossover analysis of the short-term effect of  
20 570 PM2.5 on hospitalizations and mortality in subjects with diabetes and neurological disorders.  
21 571 *Environmental health : a global access science source* 2014;13(1):38. doi: 10.1186/1476-069x-  
22 572 13-38 [published Online First: 2014/06/03]  
23 573 40. Wellenius GA, Bateson TF, Mittleman MA, et al. Particulate air pollution and the rate of  
24 574 hospitalization for congestive heart failure among medicare beneficiaries in Pittsburgh,  
25 575 Pennsylvania. *Am J Epidemiol* 2005;161(11):1030-6. doi: 10.1093/aje/kwi135 [published Online  
26 576 First: 2005/05/20]  
27 577 41. Huynh QL, Blizzard CL, Marwick TH, et al. Association of ambient particulate matter with heart  
28 578 failure incidence and all-cause readmissions in Tasmania: an observational study. *BMJ Open*  
29 579 2018;8(5):e021798. doi: 10.1136/bmjopen-2018-021798  
30 580 42. von Klot S, Peters A, Aalto P, et al. Ambient air pollution is associated with increased risk of hospital  
31 581 cardiac readmissions of myocardial infarction survivors in five European cities. *Circulation*  
32 582 2005;112(20):3073-79. doi: 10.1161/CIRCULATIONAHA.105.548743  
33 583 43. Liu MH, Chan MJ, Hsu CW, et al. Association of uremic pruritus in hemodialysis patients with the  
34 584 number of days of high mean 24-hour particulate matter with a diameter of <2.5 µm.  
35 585 *Therapeutics and clinical risk management* 2017;13:255-62. doi: 10.2147/tcrm.s129133  
36 586 [published Online First: 2017/03/07]  
37 587 44. Chiu PF, Chang CH, Wu CL, et al. High particulate matter 2.5 levels and ambient temperature are  
38 588 associated with acute lung edema in patients with nondialysis Stage 5 chronic kidney disease.  
39 589 *Nephrology, dialysis, transplantation : official publication of the European Dialysis and*  
40 590 *Transplant Association - European Renal Association* 2018 doi: 10.1093/ndt/gfy144 [published  
41 591 Online First: 2018/06/26]  
42 592 45. Huang WH, Yen TH, Chan MJ, et al. Impact of environmental particulate matter and peritoneal  
43 593 dialysis-related infection in patients undergoing peritoneal dialysis. *Medicine* 2014;93(25):e149.  
44 594 doi: 10.1097/md.000000000000149 [published Online First: 2014/12/02]  
45 595 46. Mathew AT, Rosen L, Pekmezaris R, et al. Potentially Avoidable Readmissions in United States  
46 596 Hemodialysis Patients. *Kidney Int Rep* 2017;3(2):343-55. doi: 10.1016/j.ekir.2017.10.014  
47 597 47. Wei YG, Wang Y, Di Q, et al. Short term exposure to fine particulate matter and hospital admission  
48 598 risks and costs in the Medicare population: time stratified, case crossover study. *BMJ-British*  
49 599 *Medical Journal* 2019;367:13. doi: 10.1136/bmj.l6258

600

For peer review only

601 **Table 1.** Baseline Demographic Characteristics of the Study Population Between 2008 and  
 602 2014 by Hospital Admission Category.

| Characteristic                    | No. (%)                  |                               |                            |
|-----------------------------------|--------------------------|-------------------------------|----------------------------|
|                                   | All-cause<br>N = 351,294 | Cardiovascular<br>n = 262,385 | Respiratory<br>n = 247,829 |
| Age (yr), mean (SD)               | 64.69 (14.70)            | 65.58 (14.53)                 | 65.61 (14.48)              |
| Male sex (%)                      | 190,716 (54.3)           | 140,206 (53.4)                | 132,288 (53.4)             |
| Race                              |                          |                               |                            |
| White                             | 209,921 (59.8)           | 155,405 (59.2)                | 147,204 (59.4)             |
| Black                             | 122,943 (35.0)           | 93,325 (35.6)                 | 87,831 (35.4)              |
| Other                             | 18,430 (5.2)             | 13,655 (5.2)                  | 12,794 (5.2)               |
| Smoking status at initiation (no) | 330,837 (94.2)           | 246,634 (94.0)                | 232,396 (93.8)             |

603

604 **Table 2.** Hospital Admission Characteristics Among the Study Population Between 2008 and  
605 2014.

| Outcome                       | Number of Events (Number of Unique Patients) |                   |                   |
|-------------------------------|----------------------------------------------|-------------------|-------------------|
|                               | All-cause                                    | Cardiovascular    | Respiratory       |
| Admissions                    | 1,801,966 (351,294)                          | 832,255 (262,385) | 766,447 (247,829) |
| Discharged alive              | 1,493,795 (312,521)                          | 685,680 (229,780) | 637,250 (217,221) |
| Early-readmission (1-7d)      | 177,552 (91,944)                             | 83,533 (52,622)   | 78,723 (49,576)   |
| Late-readmission (8-30d)      | 319,058 (130,935)                            | 150,576 (81,149)  | 142,139 (76,722)  |
| Length of stay, d             |                                              |                   |                   |
| Mean (SD)                     | 6.98 (10.68)                                 | 7.05 (10.34)      | 7.07 (10.38)      |
| Median (IQR)                  | 4 (2-7)                                      | 4 (2-8)           | 4 (2-8)           |
| Hospital visits in prior year |                                              |                   |                   |
| 3+ visits                     | 637,503 (123,949)                            | 307,891 (93,399)  | 292,803 (89,905)  |
| Mean (SD)                     | 2.97 (3.80)                                  | 3.14 (3.95)       | 3.21 (3.89)       |
| Median (IQR)                  | 2 (1-4)                                      | 2 (1-4)           | 2 (1-4)           |

606

607

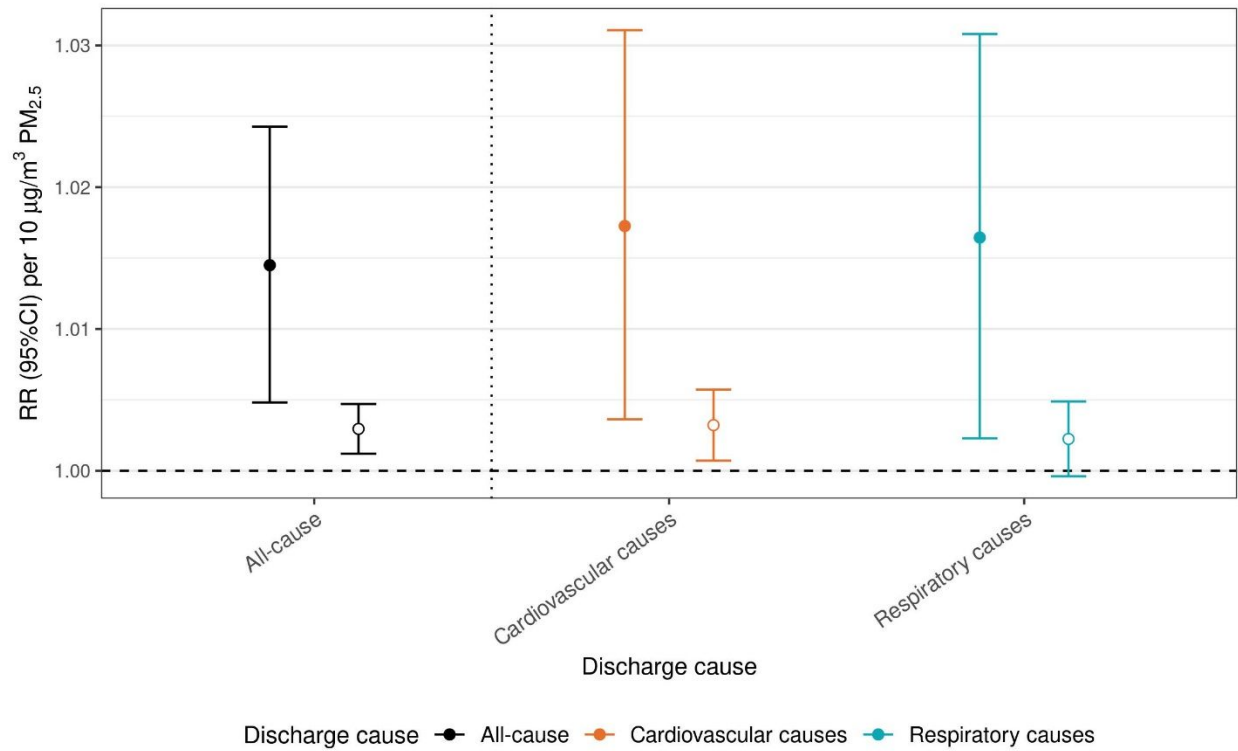

608

609 **Figure 1.** The relative risk (RR, 95%CI) for an all-cause early and late-readmission following all-  
 610 cause and cause-specific discharges. Discharges are color coded: all-cause discharges are  
 611 indicated in black, cardiovascular causes in orange, and respiratory causes in blue. Early-  
 612 readmissions are indicated with filled in circles, late-readmissions with open circles. RR is  
 613 expressed per 10  $\mu\text{g}/\text{m}^3$  increase in  $\text{PM}_{2.5}$ .

614

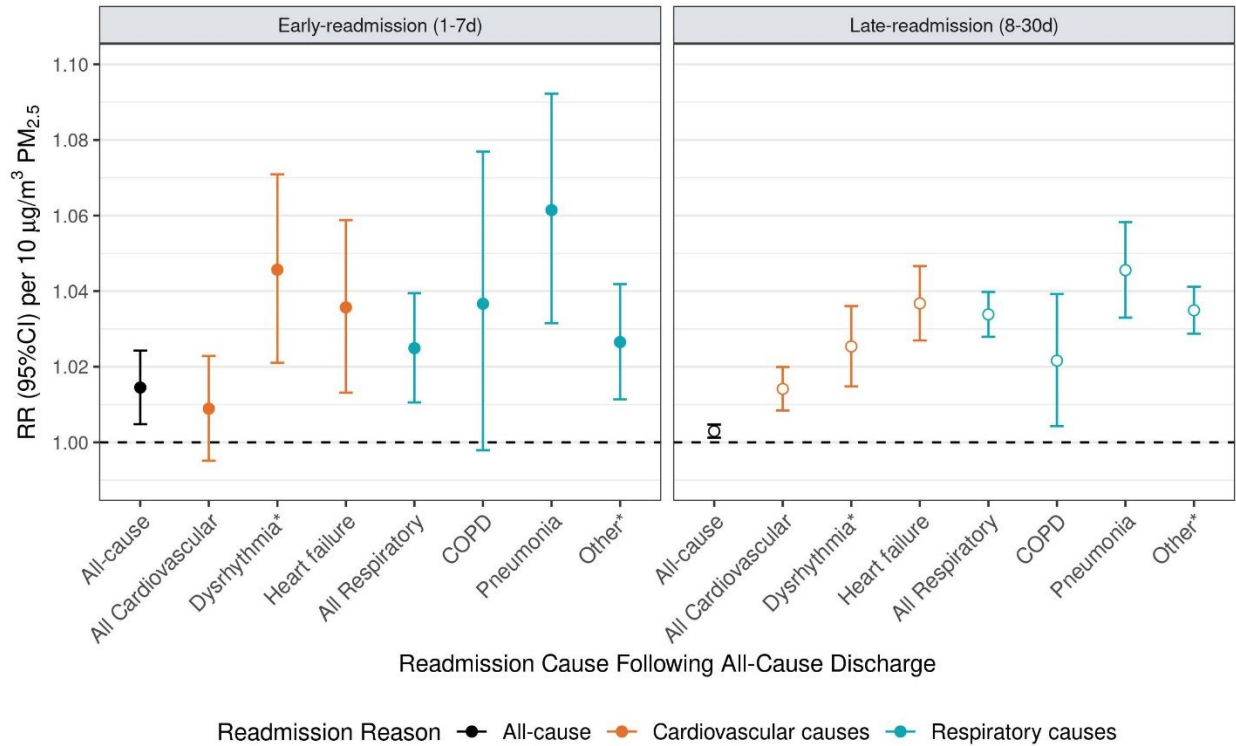

19  
20  
21  
22  
23  
24  
25  
26  
27  
28  
29  
30  
31  
32  
33  
34  
35  
36  
37  
38  
39  
40  
41  
42  
43  
44  
45  
46  
47  
48  
49  
50  
51  
52  
53  
54  
55  
56  
57  
58  
59  
60

**Figure 2.** The relative risk (RR, 95%CI) of cause-specific early and late-readmission following all-cause discharge. Readmission causes are color coded: all-cause readmissions are indicated in black, cardiovascular causes in orange, and respiratory causes in blue. RR is expressed per 10 µg/m<sup>3</sup> increase in PM<sub>2.5</sub>.

1  
2  
3  
4  
5  
6  
7  
8  
9  
10  
11  
12  
13  
14  
15  
16  
17  
18  
19  
20  
21  
22  
23  
24  
25  
26  
27  
28  
29  
30  
31  
32  
33  
34  
35  
36  
37  
38  
39  
40  
41  
42  
43  
44  
45  
46  
47

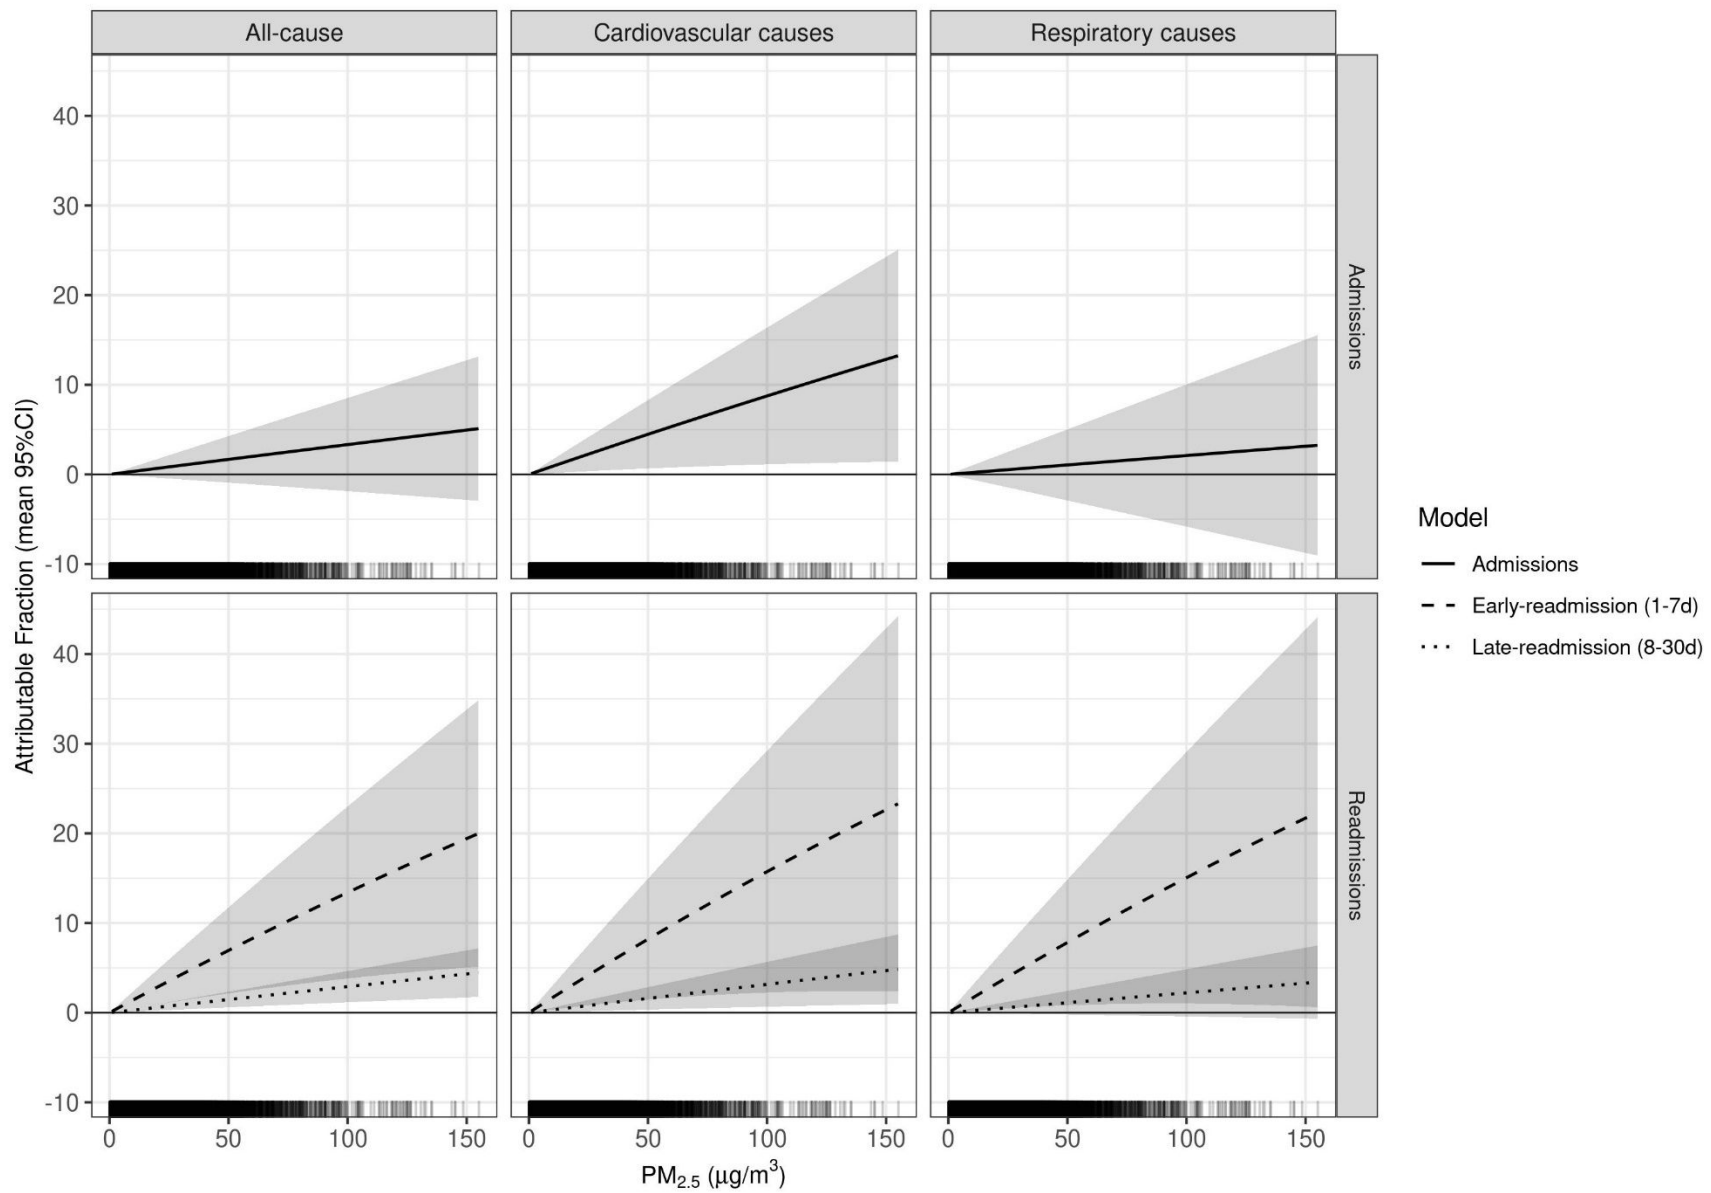

621

1  
2  
3 622 **Figure 3.** Mean proportion (95%CI) of all-cause and cause-specific hospital admissions, early readmissions (1-7d), and late  
4  
5 623 readmissions (8-30d) with respect to PM<sub>2.5</sub> (µg/m<sup>3</sup>). Hash marks above the x-axis represent the density of daily county PM<sub>2.5</sub>.  
6  
7 624  
8  
9  
10  
11  
12  
13  
14  
15  
16  
17  
18  
19  
20  
21  
22  
23  
24  
25  
26  
27  
28  
29  
30  
31  
32  
33  
34  
35  
36  
37  
38  
39  
40  
41  
42  
43  
44  
45  
46  
47

For peer review only



1  
2  
3  
4  
5  
6  
7  
8  
9  
10  
11  
12  
13  
14  
15  
16  
17  
18  
19  
20  
21  
22  
23  
24  
25  
26  
27  
28  
29  
30  
31  
32  
33  
34  
35  
36  
37  
38  
39  
40  
41  
42  
43  
44  
45  
46  
47  
48  
49  
50  
51  
52  
53  
54  
55  
56  
57  
58  
59  
60

A) Daily county average PM<sub>2.5</sub> (7yr average)

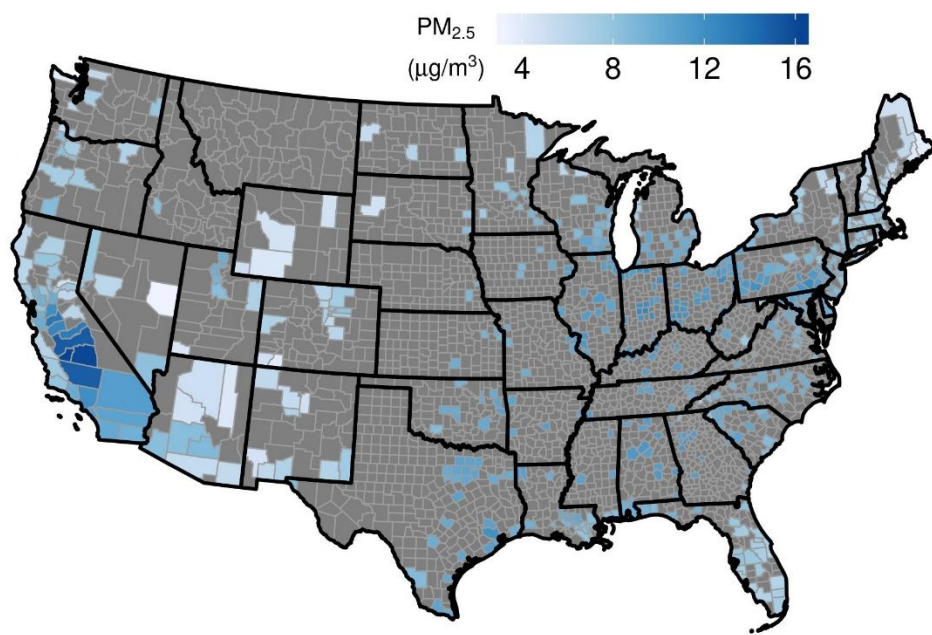

B) Exposure attributable fraction for early-readmission following an all-cause discharge

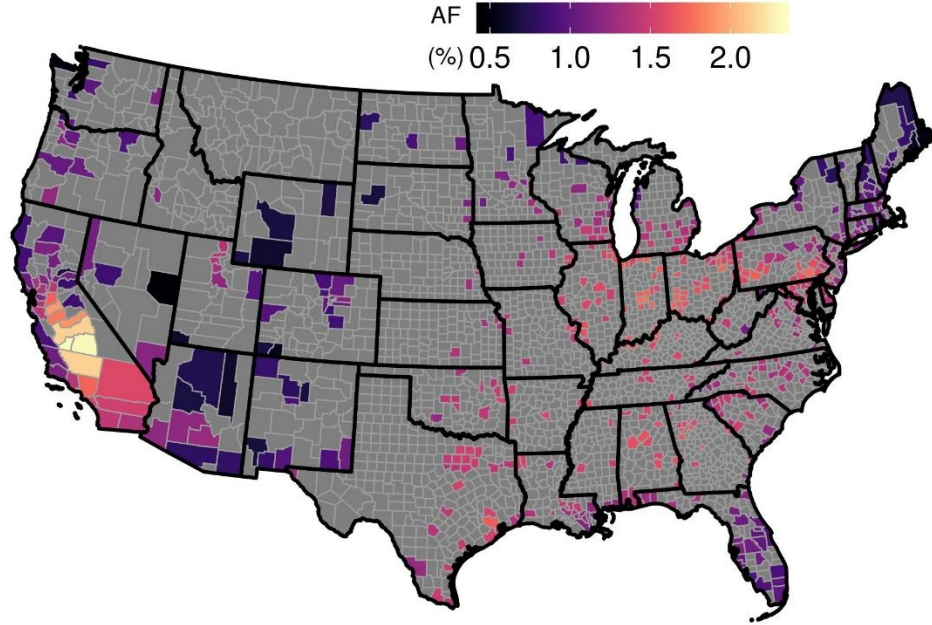

625

1  
2  
3 626 **Figure 4.** Average daily county PM<sub>2.5</sub> (µg/m<sup>3</sup>) between 2008 and 2014 (A) and the attributable  
4  
5 627 fraction for early-readmission following an all-cause discharge based on the average PM<sub>2.5</sub> (B)  
6  
7 628 for the 530 counties included in the study.  
8  
9  
10  
11  
12  
13  
14  
15  
16  
17  
18  
19  
20  
21  
22  
23  
24  
25  
26  
27  
28  
29  
30  
31  
32  
33  
34  
35  
36  
37  
38  
39  
40  
41  
42  
43  
44  
45  
46  
47  
48  
49  
50  
51  
52  
53  
54  
55  
56  
57  
58  
59  
60

For peer review only

629 **Supplemental Materials**

630

631 **Table S1.** Summary statistics of PM<sub>2.5</sub> and meteorological variables across 530 counties.

| Variable                               | Mean ± SD     | Minimum | Maximum |
|----------------------------------------|---------------|---------|---------|
| PM <sub>2.5</sub> (µg/m <sup>3</sup> ) | 9.29 ± 5.39   | 0.05    | 155.16  |
| Temperature (°F)                       | 56.37 ± 18.50 | -37.30  | 104.74  |
| Relative humidity (%)                  | 65.24 ± 16.24 | 0       | 100     |

632

633 **Table S2.** Relative risk (RR ± 95% CI) of all-cause and cause-specific daily county admission634 rates associated with a 10 µg/m<sup>3</sup> increase in PM<sub>2.5</sub> for exposure lags 0-14 days

| Endpoint  | Lag | RR (95% CI)          | N         |
|-----------|-----|----------------------|-----------|
| All-cause | 0   | 1.003 (0.998, 1.009) | 1,801,966 |
| All-cause | 1   | 0.997 (0.990, 1.003) | 1,801,966 |
| All-cause | 2   | 0.999 (0.992, 1.005) | 1,801,966 |
| All-cause | 3   | 0.996 (0.990, 1.002) | 1,801,966 |
| All-cause | 4   | 1.002 (0.996, 1.008) | 1,801,966 |
| All-cause | 5   | 1.001 (0.995, 1.007) | 1,801,966 |
| All-cause | 6   | 1.001 (0.995, 1.008) | 1,801,966 |
| All-cause | 7   | 1.000 (0.993, 1.006) | 1,801,966 |
| All-cause | 8   | 1.004 (0.997, 1.010) | 1,801,966 |
| All-cause | 9   | 1.004 (0.998, 1.010) | 1,801,966 |
| All-cause | 10  | 0.999 (0.993, 1.005) | 1,801,966 |
| All-cause | 11  | 0.996 (0.989, 1.002) | 1,801,966 |
| All-cause | 12  | 1.002 (0.996, 1.009) | 1,801,966 |
| All-cause | 13  | 0.995 (0.989, 1.001) | 1,801,966 |

|                              |    |                      |           |
|------------------------------|----|----------------------|-----------|
| All-cause                    | 14 | 1.000 (0.994, 1.005) | 1,801,966 |
| CVD broad definition         | 0  | 1.009 (1.002, 1.017) | 832,255   |
| CVD broad definition         | 1  | 0.995 (0.986, 1.004) | 832,255   |
| CVD broad definition         | 2  | 0.998 (0.988, 1.007) | 832,255   |
| CVD broad definition         | 3  | 0.993 (0.984, 1.002) | 832,255   |
| CVD broad definition         | 4  | 1.003 (0.994, 1.012) | 832,255   |
| CVD broad definition         | 5  | 1.004 (0.994, 1.013) | 832,255   |
| CVD broad definition         | 6  | 0.999 (0.990, 1.008) | 832,255   |
| CVD broad definition         | 7  | 1.005 (0.995, 1.014) | 832,255   |
| CVD broad definition         | 8  | 1.002 (0.993, 1.011) | 832,255   |
| CVD broad definition         | 9  | 1.009 (1.000, 1.018) | 832,255   |
| CVD broad definition         | 10 | 0.992 (0.983, 1.001) | 832,255   |
| CVD broad definition         | 11 | 0.999 (0.990, 1.008) | 832,255   |
| CVD broad definition         | 12 | 0.999 (0.990, 1.008) | 832,255   |
| CVD broad definition         | 13 | 0.996 (0.987, 1.005) | 832,255   |
| CVD broad definition         | 14 | 1.002 (0.994, 1.009) | 832,255   |
| Respiratory broad definition | 0  | 1.002 (0.994, 1.010) | 766,447   |
| Respiratory broad definition | 1  | 0.998 (0.989, 1.008) | 766,447   |
| Respiratory broad definition | 2  | 0.995 (0.985, 1.004) | 766,447   |
| Respiratory broad definition | 3  | 0.995 (0.985, 1.004) | 766,447   |
| Respiratory broad definition | 4  | 0.999 (0.989, 1.008) | 766,447   |
| Respiratory broad definition | 5  | 1.009 (1.000, 1.019) | 766,447   |
| Respiratory broad definition | 6  | 0.999 (0.990, 1.009) | 766,447   |
| Respiratory broad definition | 7  | 0.999 (0.989, 1.009) | 766,447   |
| Respiratory broad definition | 8  | 1.005 (0.996, 1.015) | 766,447   |

|                              |    |                      |         |
|------------------------------|----|----------------------|---------|
| Respiratory broad definition | 9  | 1.008 (0.999, 1.018) | 766,447 |
| Respiratory broad definition | 10 | 0.995 (0.985, 1.004) | 766,447 |
| Respiratory broad definition | 11 | 0.997 (0.988, 1.007) | 766,447 |
| Respiratory broad definition | 12 | 1.002 (0.992, 1.011) | 766,447 |
| Respiratory broad definition | 13 | 0.997 (0.987, 1.006) | 766,447 |
| Respiratory broad definition | 14 | 1.001 (0.993, 1.009) | 766,447 |

635

636 **Table S3.** The relative risk (RR, 95%CI) for an all-cause early and late-readmission following637 all-cause and cause-specific discharges. RR is expressed per 10  $\mu\text{g}/\text{m}^3$  increase in  $\text{PM}_{2.5}$ .

| Discharge cause              | Model                    | RR (95% CI)          | N       |
|------------------------------|--------------------------|----------------------|---------|
| All-cause                    | Early-readmission (1-7d) | 1.014 (1.005, 1.024) | 177,552 |
| All-cause                    | Late-readmission (8-30d) | 1.003 (1.001, 1.005) | 319,058 |
| CVD broad definition         | Early-readmission (1-7d) | 1.017 (1.004, 1.031) | 83,533  |
| CVD broad definition         | Late-readmission (8-30d) | 1.003 (1.001, 1.006) | 150,576 |
| Respiratory broad definition | Early-readmission (1-7d) | 1.016 (1.002, 1.031) | 78,723  |
| Respiratory broad definition | Late-readmission (8-30d) | 1.002 (0.999, 1.005) | 142,139 |

638

639

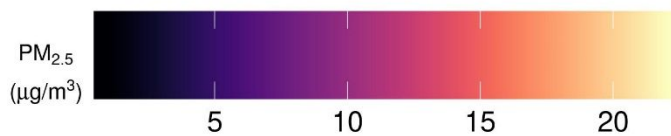

A) Long-term county PM<sub>2.5</sub> (7yr average)

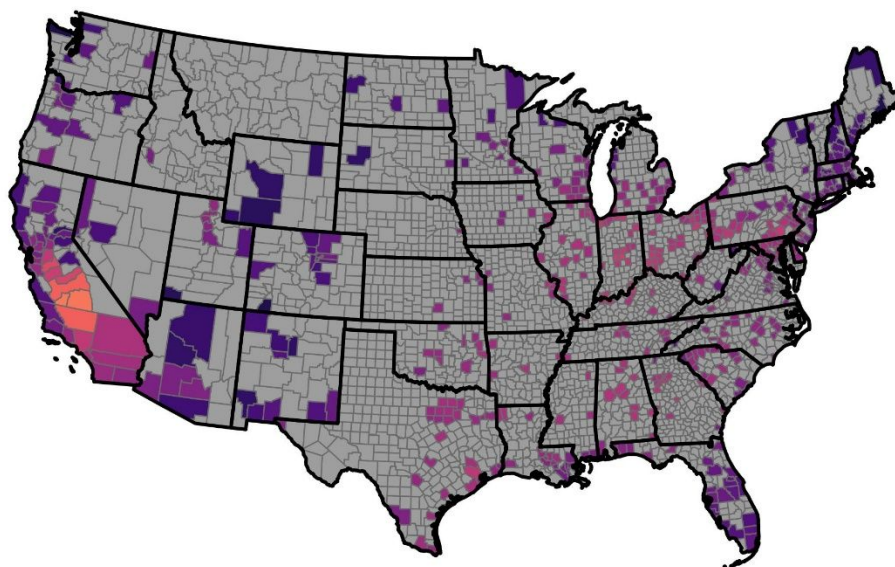

B) 20% of county days are above PM<sub>2.5</sub> (80th percentile)

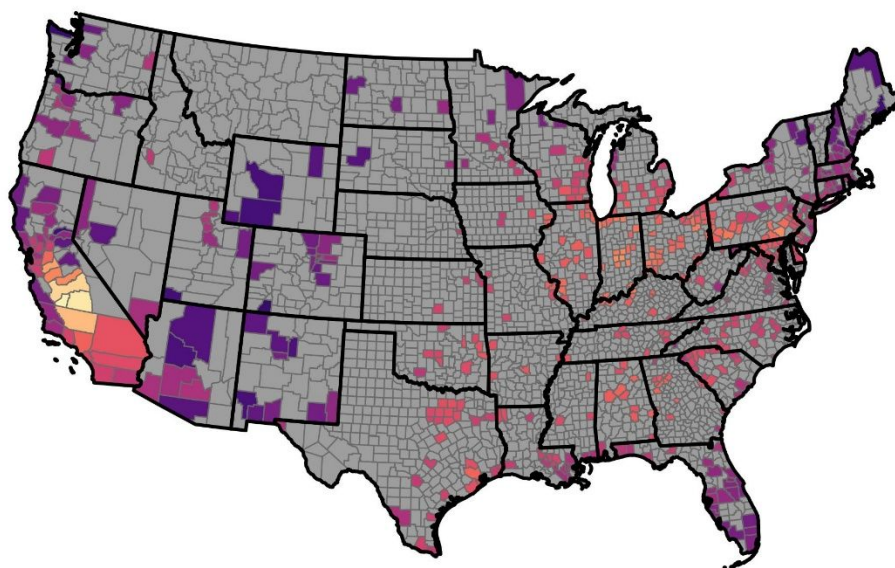

640

1  
2  
3 641 **Figure S1.** County PM<sub>2.5</sub> levels for the 530 counties included in the study. PM<sub>2.5</sub> levels shown  
4  
5 642 include the A) long-term average and B) 80th percentile (indicating that 20% of county days are  
6  
7 643 at or above this PM<sub>2.5</sub> level) for the years 2008-2014.  
8  
9  
10 644

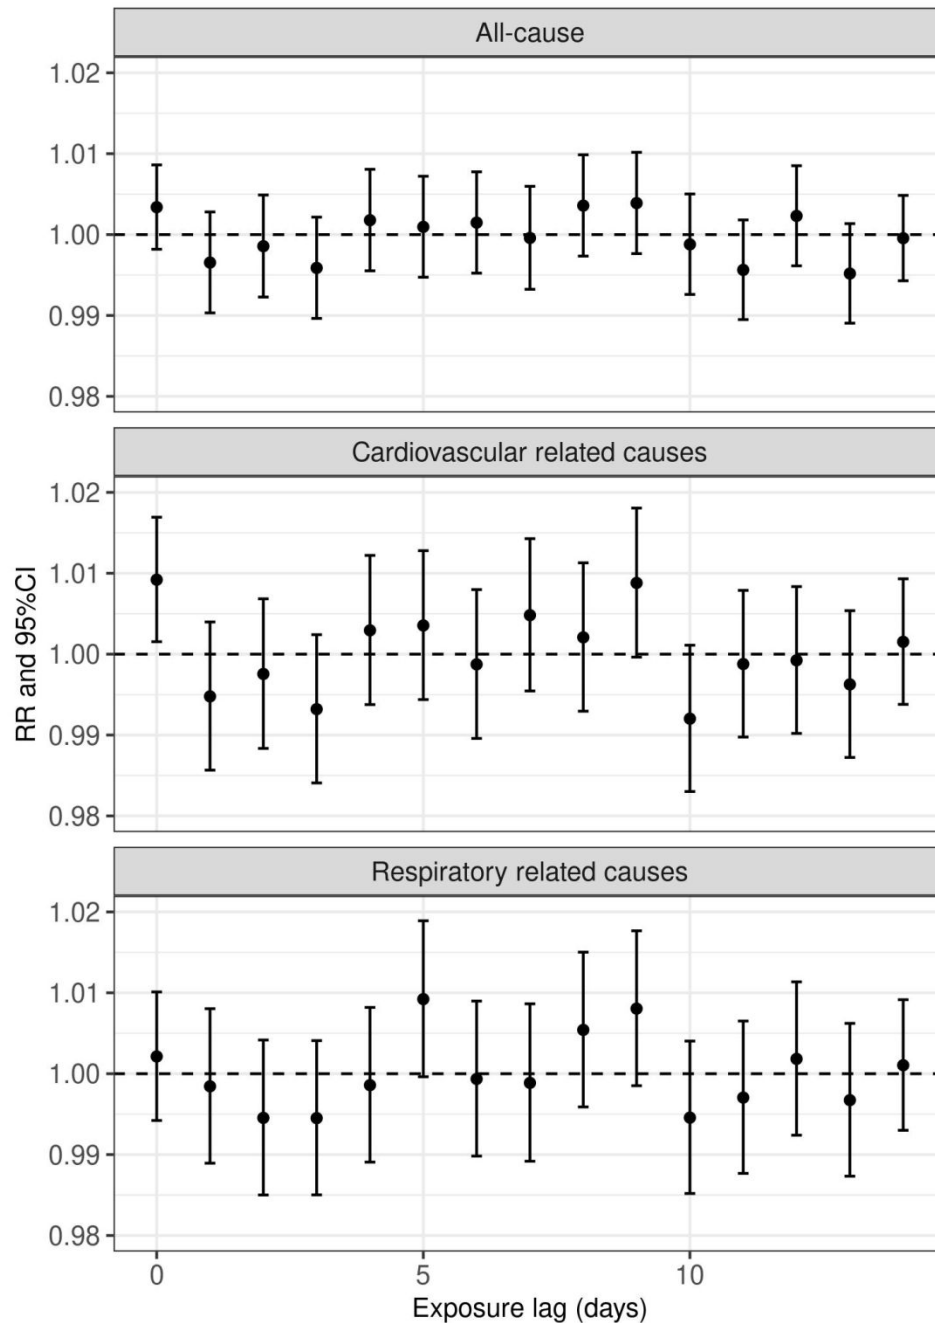

645

1  
2  
3 646 **Figure S2.** Relative risk (RR  $\pm$  95%CI) for daily county admission rates for all-cause  
4  
5 647 hospitalization associated with a 10  $\mu\text{g}/\text{m}^3$  increase in  $\text{PM}_{2.5}$  for exposure lags 0-14 days using  
6  
7 648 an unconstrained distributed lag model (Table S1).  
8

9 649

10  
11 650  
12  
13  
14  
15  
16  
17  
18  
19  
20  
21  
22  
23  
24  
25  
26  
27  
28  
29  
30  
31  
32  
33  
34  
35  
36  
37  
38  
39  
40  
41  
42  
43  
44  
45  
46  
47  
48  
49  
50  
51  
52  
53  
54  
55  
56  
57  
58  
59  
60

For peer review only



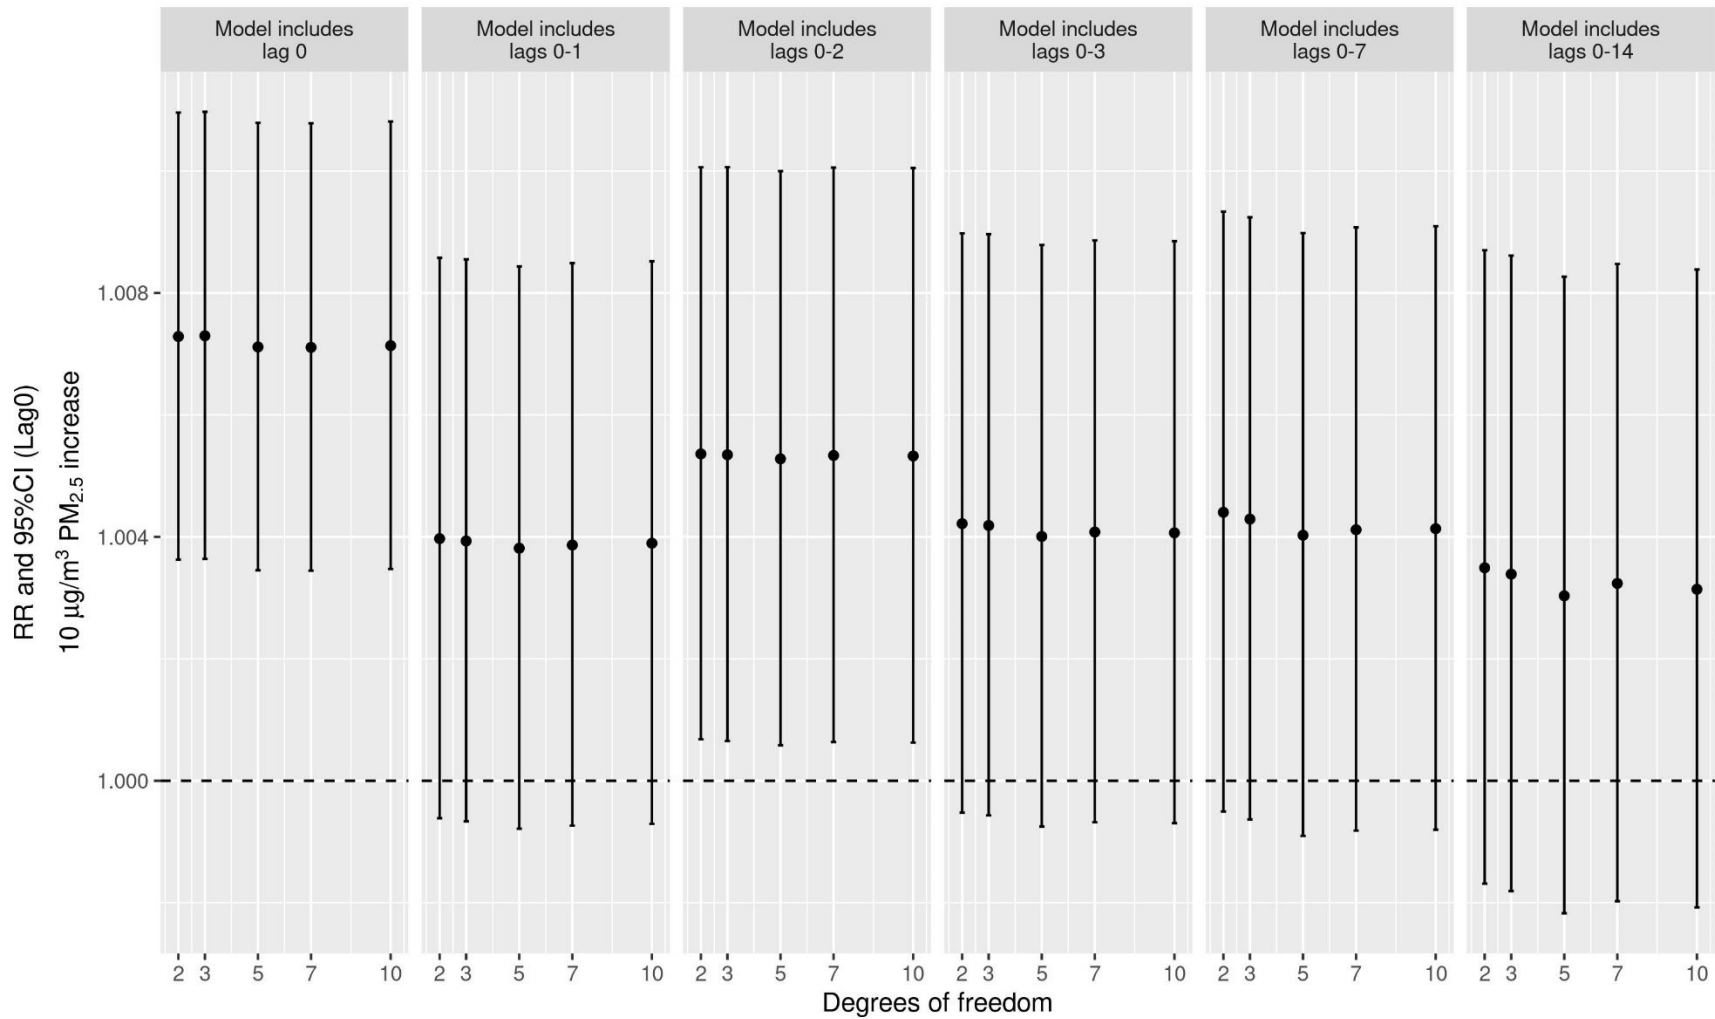

651  
 652 **Figure S3.** Sensitivity analysis for all-cause admissions models showing the impact on the lag 0 estimate from changing the number  
 653 of lags considered (grouped figures), and the number of degrees of freedom (x-axis) for the temperature and relative humidity  
 654 variables. Relative risk (RR ± 95%CI) of all-cause daily county admission rates associated with a 10 µg/m³ increase in PM<sub>2.5</sub> on lag 0.

655

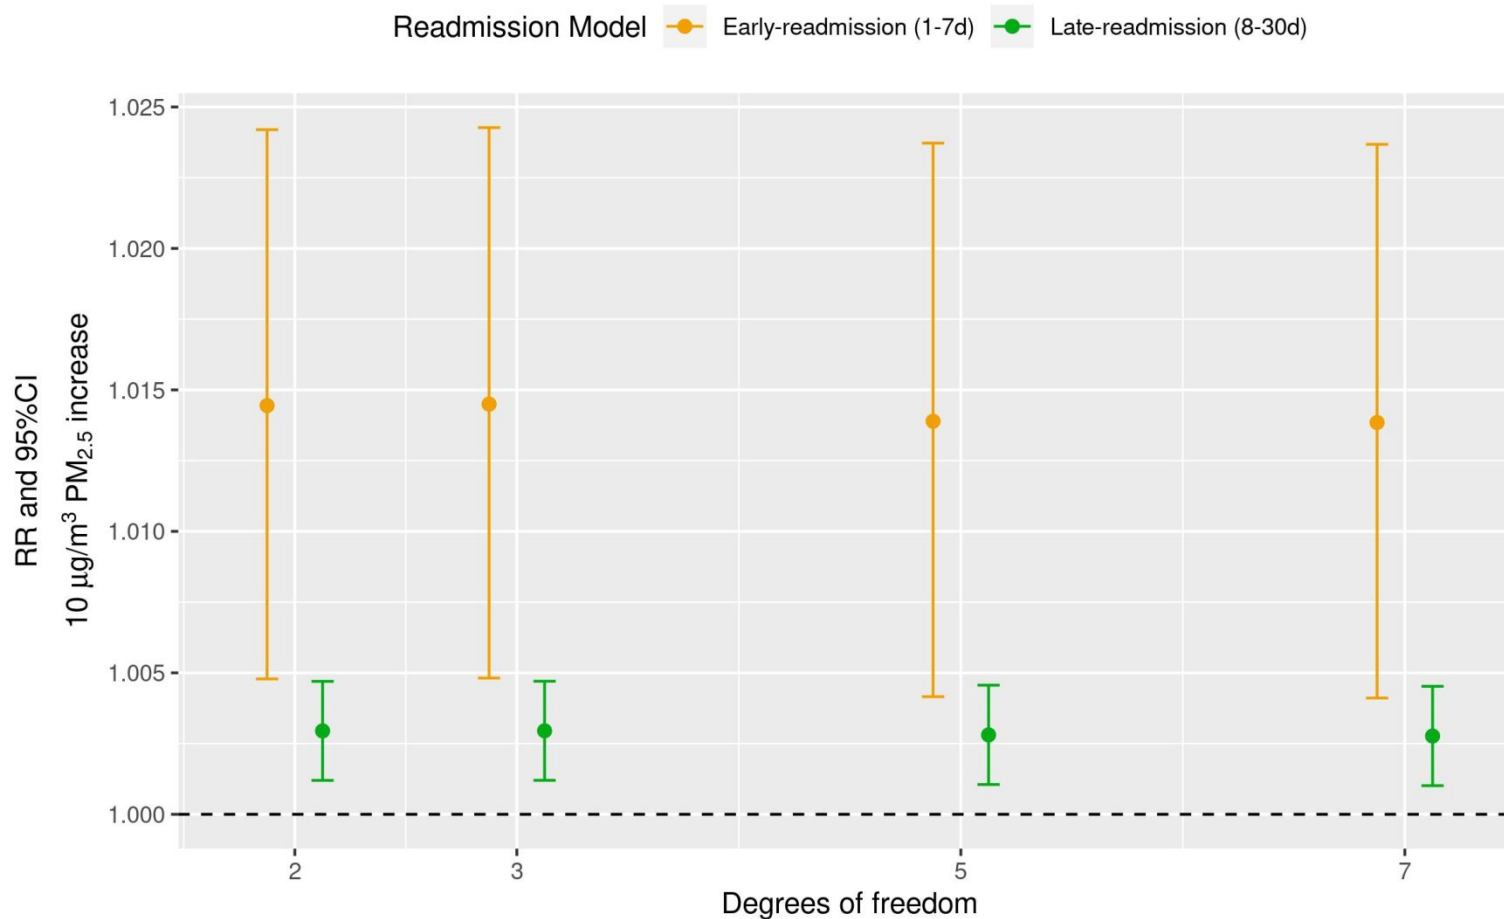

656

657 **Figure S4.** Sensitivity analysis for all-cause readmission models showing the impact on the lag 0 estimate from changing the number  
 658 of degrees of freedom (x-axis) for the temperature and relative humidity variables. Relative risk (RR ± 95%CI) of all-cause daily  
 659 county admission rates associated with a 10 µg/m<sup>3</sup> increase in PM<sub>2.5</sub> on lag 0.

1  
2  
3 **1 Supplemental Materials for**

4  
5 **2 Association of short-term ambient PM<sub>2.5</sub> with hospital admissions and 30-day readmissions in**  
6  
7 **3 end-stage renal disease patients: population based retrospective cohort study**  
8  
9  
10 **4**

11 **5 Table S1.** Summary statistics of PM<sub>2.5</sub> and meteorological variables across 530 counties.  
12

| Variable                               | Mean ± SD     | Minimum | Maximum |
|----------------------------------------|---------------|---------|---------|
| PM <sub>2.5</sub> (µg/m <sup>3</sup> ) | 9.29 ± 5.39   | 0.05    | 155.16  |
| Temperature (°F)                       | 56.37 ± 18.50 | -37.30  | 104.74  |
| Relative humidity (%)                  | 65.24 ± 16.24 | 0       | 100     |

13  
14  
15  
16  
17  
18  
19  
20  
21  
22 **6**  
23  
24 **7 Table S2.** Relative risk (RR ± 95% CI) of all-cause and cause-specific daily county admission  
25  
26 **8 rates associated with a 10 µg/m<sup>3</sup> increase in PM<sub>2.5</sub> for exposure lags 0-14 days**  
27  
28

| Endpoint  | Lag | RR (95% CI)          |
|-----------|-----|----------------------|
| All-cause | 0   | 1.003 (0.998, 1.009) |
| All-cause | 1   | 0.997 (0.990, 1.003) |
| All-cause | 2   | 0.999 (0.992, 1.005) |
| All-cause | 3   | 0.996 (0.990, 1.002) |
| All-cause | 4   | 1.002 (0.996, 1.008) |
| All-cause | 5   | 1.001 (0.995, 1.007) |
| All-cause | 6   | 1.001 (0.995, 1.008) |
| All-cause | 7   | 1.000 (0.993, 1.006) |
| All-cause | 8   | 1.004 (0.997, 1.010) |
| All-cause | 9   | 1.004 (0.998, 1.010) |
| All-cause | 10  | 0.999 (0.993, 1.005) |
| All-cause | 11  | 0.996 (0.989, 1.002) |

|                              |    |                      |
|------------------------------|----|----------------------|
| All-cause                    | 12 | 1.002 (0.996, 1.009) |
| All-cause                    | 13 | 0.995 (0.989, 1.001) |
| All-cause                    | 14 | 1.000 (0.994, 1.005) |
| CVD broad definition         | 0  | 1.009 (1.002, 1.017) |
| CVD broad definition         | 1  | 0.995 (0.986, 1.004) |
| CVD broad definition         | 2  | 0.998 (0.988, 1.007) |
| CVD broad definition         | 3  | 0.993 (0.984, 1.002) |
| CVD broad definition         | 4  | 1.003 (0.994, 1.012) |
| CVD broad definition         | 5  | 1.004 (0.994, 1.013) |
| CVD broad definition         | 6  | 0.999 (0.990, 1.008) |
| CVD broad definition         | 7  | 1.005 (0.995, 1.014) |
| CVD broad definition         | 8  | 1.002 (0.993, 1.011) |
| CVD broad definition         | 9  | 1.009 (1.000, 1.018) |
| CVD broad definition         | 10 | 0.992 (0.983, 1.001) |
| CVD broad definition         | 11 | 0.999 (0.990, 1.008) |
| CVD broad definition         | 12 | 0.999 (0.990, 1.008) |
| CVD broad definition         | 13 | 0.996 (0.987, 1.005) |
| CVD broad definition         | 14 | 1.002 (0.994, 1.009) |
| Respiratory broad definition | 0  | 1.002 (0.994, 1.010) |
| Respiratory broad definition | 1  | 0.998 (0.989, 1.008) |
| Respiratory broad definition | 2  | 0.995 (0.985, 1.004) |
| Respiratory broad definition | 3  | 0.995 (0.985, 1.004) |
| Respiratory broad definition | 4  | 0.999 (0.989, 1.008) |
| Respiratory broad definition | 5  | 1.009 (1.000, 1.019) |
| Respiratory broad definition | 6  | 0.999 (0.990, 1.009) |

|                              |    |                      |
|------------------------------|----|----------------------|
| Respiratory broad definition | 7  | 0.999 (0.989, 1.009) |
| Respiratory broad definition | 8  | 1.005 (0.996, 1.015) |
| Respiratory broad definition | 9  | 1.008 (0.999, 1.018) |
| Respiratory broad definition | 10 | 0.995 (0.985, 1.004) |
| Respiratory broad definition | 11 | 0.997 (0.988, 1.007) |
| Respiratory broad definition | 12 | 1.002 (0.992, 1.011) |
| Respiratory broad definition | 13 | 0.997 (0.987, 1.006) |
| Respiratory broad definition | 14 | 1.001 (0.993, 1.009) |

9

10 **Table S3.** Relative risk (RR  $\pm$  95% CI) for early and late-readmissions following all-cause and  
 11 cause-specific discharges. RR is associated with a 10  $\mu\text{g}/\text{m}^3$  increase in  $\text{PM}_{2.5}$ .

| Discharge Cause              | Model                    | RR (95% CI)          |
|------------------------------|--------------------------|----------------------|
| All-cause                    | Early-readmission (1-7d) | 1.014 (1.005, 1.024) |
| All-cause                    | Late-readmission (8-30d) | 1.003 (1.001, 1.005) |
| CVD broad definition         | Early-readmission (1-7d) | 1.017 (1.004, 1.031) |
| CVD broad definition         | Late-readmission (8-30d) | 1.003 (1.001, 1.006) |
| Respiratory broad definition | Early-readmission (1-7d) | 1.016 (1.002, 1.031) |
| Respiratory broad definition | Late-readmission (8-30d) | 1.002 (0.999, 1.005) |

12

13 **Table S4.** Relative risk (RR  $\pm$  95% CI) for early and late all-cause and cause specific readmissions following all-cause,  
 14 cardiovascular, and respiratory discharges. RR is associated with a 10  $\mu\text{g}/\text{m}^3$  increase in  $\text{PM}_{2.5}$ .

| Discharge Cause | Readmission cause                             | Model                    | RR (95% CI)          |
|-----------------|-----------------------------------------------|--------------------------|----------------------|
| All-cause       | All-cause                                     | Early-readmission (1-7d) | 1.014 (1.005, 1.024) |
| All-cause       | All-cause                                     | Late-readmission (8-30d) | 1.003 (1.001, 1.005) |
| All-cause       | CVD broad definition                          | Early-readmission (1-7d) | 1.009 (0.995, 1.023) |
| All-cause       | CVD broad definition                          | Late-readmission (8-30d) | 1.014 (1.008, 1.020) |
| All-cause       | Dysrhythmia and conduction disorder           | Early-readmission (1-7d) | 1.046 (1.021, 1.071) |
| All-cause       | Dysrhythmia and conduction disorder           | Late-readmission (8-30d) | 1.025 (1.015, 1.036) |
| All-cause       | Heart failure                                 | Early-readmission (1-7d) | 1.036 (1.013, 1.059) |
| All-cause       | Heart failure                                 | Late-readmission (8-30d) | 1.037 (1.027, 1.047) |
| All-cause       | Hypertension                                  | Early-readmission (1-7d) | 1.007 (0.990, 1.024) |
| All-cause       | Hypertension                                  | Late-readmission (8-30d) | 1.006 (0.999, 1.014) |
| All-cause       | Ischemic heart disease                        | Early-readmission (1-7d) | 0.974 (0.934, 1.016) |
| All-cause       | Ischemic heart disease                        | Late-readmission (8-30d) | 1.016 (0.998, 1.035) |
| All-cause       | Myocardial infarction                         | Early-readmission (1-7d) | 0.962 (0.913, 1.014) |
| All-cause       | Myocardial infarction                         | Late-readmission (8-30d) | 0.999 (0.976, 1.022) |
| All-cause       | Peripheral arterial disease                   | Early-readmission (1-7d) | 0.902 (0.752, 1.083) |
| All-cause       | Peripheral arterial disease                   | Late-readmission (8-30d) | 0.975 (0.903, 1.054) |
| All-cause       | Pulmonary embolism                            | Early-readmission (1-7d) | 1.047 (0.932, 1.177) |
| All-cause       | Pulmonary embolism                            | Late-readmission (8-30d) | 1.032 (0.973, 1.094) |
| All-cause       | Asthma                                        | Early-readmission (1-7d) | 1.098 (0.988, 1.222) |
| All-cause       | Asthma                                        | Late-readmission (8-30d) | 1.013 (0.971, 1.058) |
| All-cause       | COPD                                          | Early-readmission (1-7d) | 1.037 (0.998, 1.077) |
| All-cause       | COPD                                          | Late-readmission (8-30d) | 1.022 (1.004, 1.039) |
| All-cause       | Other non-cardiac chest pain or resp syndrome | Early-readmission (1-7d) | 1.027 (1.011, 1.042) |
| All-cause       | Other non-cardiac chest pain or resp syndrome | Late-readmission (8-30d) | 1.035 (1.029, 1.041) |
| All-cause       | Pneumonia                                     | Early-readmission (1-7d) | 1.061 (1.032, 1.092) |
| All-cause       | Pneumonia                                     | Late-readmission (8-30d) | 1.046 (1.033, 1.058) |

|    |                              |                                               |                                               |
|----|------------------------------|-----------------------------------------------|-----------------------------------------------|
| 1  |                              |                                               |                                               |
| 2  |                              |                                               |                                               |
| 3  | All-cause                    | Respiratory broad definition                  | Early-readmission (1-7d) 1.025 (1.011, 1.039) |
| 4  | All-cause                    | Respiratory broad definition                  | Late-readmission (8-30d) 1.034 (1.028, 1.040) |
| 5  | CVD broad definition         | All-cause                                     | Early-readmission (1-7d) 1.017 (1.004, 1.031) |
| 6  | CVD broad definition         | All-cause                                     | Late-readmission (8-30d) 1.003 (1.001, 1.006) |
| 7  | CVD broad definition         | CVD broad definition                          | Early-readmission (1-7d) 1.006 (0.989, 1.024) |
| 8  | CVD broad definition         | CVD broad definition                          | Late-readmission (8-30d) 1.013 (1.005, 1.020) |
| 9  | CVD broad definition         | Dysrhythmia and conduction disorder           | Early-readmission (1-7d) 1.042 (1.010, 1.074) |
| 10 | CVD broad definition         | Dysrhythmia and conduction disorder           | Late-readmission (8-30d) 1.027 (1.013, 1.041) |
| 11 | CVD broad definition         | Heart failure                                 | Early-readmission (1-7d) 1.027 (1.000, 1.056) |
| 12 | CVD broad definition         | Heart failure                                 | Late-readmission (8-30d) 1.031 (1.019, 1.043) |
| 13 | CVD broad definition         | Hypertension                                  | Early-readmission (1-7d) 1.006 (0.985, 1.028) |
| 14 | CVD broad definition         | Hypertension                                  | Late-readmission (8-30d) 1.002 (0.993, 1.011) |
| 15 | CVD broad definition         | Ischemic heart disease                        | Early-readmission (1-7d) 1.015 (0.964, 1.070) |
| 16 | CVD broad definition         | Ischemic heart disease                        | Late-readmission (8-30d) 1.017 (0.993, 1.041) |
| 17 | CVD broad definition         | Myocardial infarction                         | Early-readmission (1-7d) 0.991 (0.927, 1.058) |
| 18 | CVD broad definition         | Myocardial infarction                         | Late-readmission (8-30d) 1.002 (0.972, 1.032) |
| 19 | CVD broad definition         | Peripheral arterial disease                   | Early-readmission (1-7d) 0.914 (0.688, 1.215) |
| 20 | CVD broad definition         | Peripheral arterial disease                   | Late-readmission (8-30d) 1.029 (0.922, 1.148) |
| 21 | CVD broad definition         | Pulmonary embolism                            | Early-readmission (1-7d) 1.129 (0.984, 1.296) |
| 22 | CVD broad definition         | Pulmonary embolism                            | Late-readmission (8-30d) 1.004 (0.928, 1.085) |
| 23 | CVD broad definition         | Asthma                                        | Early-readmission (1-7d) 1.085 (0.947, 1.242) |
| 24 | CVD broad definition         | Asthma                                        | Late-readmission (8-30d) 1.006 (0.949, 1.066) |
| 25 | CVD broad definition         | COPD                                          | Early-readmission (1-7d) 1.032 (0.982, 1.085) |
| 26 | CVD broad definition         | COPD                                          | Late-readmission (8-30d) 1.026 (1.003, 1.049) |
| 27 | CVD broad definition         | Other non-cardiac chest pain or resp syndrome | Early-readmission (1-7d) 1.025 (1.005, 1.045) |
| 28 | CVD broad definition         | Other non-cardiac chest pain or resp syndrome | Late-readmission (8-30d) 1.036 (1.027, 1.044) |
| 29 | CVD broad definition         | Pneumonia                                     | Early-readmission (1-7d) 1.076 (1.036, 1.117) |
| 30 | CVD broad definition         | Pneumonia                                     | Late-readmission (8-30d) 1.041 (1.024, 1.058) |
| 31 | CVD broad definition         | Respiratory broad definition                  | Early-readmission (1-7d) 1.026 (1.007, 1.045) |
| 32 | CVD broad definition         | Respiratory broad definition                  | Late-readmission (8-30d) 1.034 (1.026, 1.042) |
| 33 | Respiratory broad definition | All-cause                                     | Early-readmission (1-7d) 1.016 (1.002, 1.031) |
| 34 |                              |                                               |                                               |
| 35 |                              |                                               |                                               |
| 36 |                              |                                               |                                               |
| 37 |                              |                                               |                                               |
| 38 |                              |                                               |                                               |
| 39 |                              |                                               |                                               |
| 40 |                              |                                               |                                               |
| 41 |                              |                                               |                                               |
| 42 |                              |                                               |                                               |
| 43 |                              |                                               |                                               |
| 44 |                              |                                               |                                               |
| 45 |                              |                                               |                                               |
| 46 |                              |                                               |                                               |
| 47 |                              |                                               |                                               |

|                              |                                               |                          |                      |
|------------------------------|-----------------------------------------------|--------------------------|----------------------|
| Respiratory broad definition | All-cause                                     | Late-readmission (8-30d) | 1.002 (1.000, 1.005) |
| Respiratory broad definition | CVD broad definition                          | Early-readmission (1-7d) | 1.007 (0.988, 1.026) |
| Respiratory broad definition | CVD broad definition                          | Late-readmission (8-30d) | 1.013 (1.005, 1.021) |
| Respiratory broad definition | Dysrhythmia and conduction disorder           | Early-readmission (1-7d) | 1.042 (1.008, 1.077) |
| Respiratory broad definition | Dysrhythmia and conduction disorder           | Late-readmission (8-30d) | 1.018 (1.004, 1.033) |
| Respiratory broad definition | Heart failure                                 | Early-readmission (1-7d) | 1.016 (0.987, 1.045) |
| Respiratory broad definition | Heart failure                                 | Late-readmission (8-30d) | 1.028 (1.015, 1.041) |
| Respiratory broad definition | Hypertension                                  | Early-readmission (1-7d) | 1.014 (0.991, 1.039) |
| Respiratory broad definition | Hypertension                                  | Late-readmission (8-30d) | 1.007 (0.997, 1.017) |
| Respiratory broad definition | Ischemic heart disease                        | Early-readmission (1-7d) | 0.971 (0.918, 1.028) |
| Respiratory broad definition | Ischemic heart disease                        | Late-readmission (8-30d) | 0.998 (0.973, 1.023) |
| Respiratory broad definition | Myocardial infarction                         | Early-readmission (1-7d) | 0.940 (0.874, 1.011) |
| Respiratory broad definition | Myocardial infarction                         | Late-readmission (8-30d) | 0.979 (0.948, 1.011) |
| Respiratory broad definition | Peripheral arterial disease                   | Early-readmission (1-7d) | 0.844 (0.596, 1.197) |
| Respiratory broad definition | Peripheral arterial disease                   | Late-readmission (8-30d) | 1.050 (0.935, 1.179) |
| Respiratory broad definition | Pulmonary embolism                            | Early-readmission (1-7d) | 1.071 (0.910, 1.260) |
| Respiratory broad definition | Pulmonary embolism                            | Late-readmission (8-30d) | 1.027 (0.941, 1.120) |
| Respiratory broad definition | Asthma                                        | Early-readmission (1-7d) | 1.068 (0.932, 1.224) |
| Respiratory broad definition | Asthma                                        | Late-readmission (8-30d) | 0.973 (0.918, 1.031) |
| Respiratory broad definition | COPD                                          | Early-readmission (1-7d) | 1.039 (0.991, 1.090) |
| Respiratory broad definition | COPD                                          | Late-readmission (8-30d) | 1.015 (0.994, 1.037) |
| Respiratory broad definition | Other non-cardiac chest pain or resp syndrome | Early-readmission (1-7d) | 1.028 (1.008, 1.048) |
| Respiratory broad definition | Other non-cardiac chest pain or resp syndrome | Late-readmission (8-30d) | 1.022 (1.014, 1.030) |
| Respiratory broad definition | Pneumonia                                     | Early-readmission (1-7d) | 1.044 (1.006, 1.084) |
| Respiratory broad definition | Pneumonia                                     | Late-readmission (8-30d) | 1.046 (1.029, 1.063) |
| Respiratory broad definition | Respiratory broad definition                  | Early-readmission (1-7d) | 1.025 (1.006, 1.044) |
| Respiratory broad definition | Respiratory broad definition                  | Late-readmission (8-30d) | 1.022 (1.014, 1.030) |
|                              |                                               |                          |                      |
|                              |                                               |                          |                      |
|                              |                                               |                          |                      |
|                              |                                               |                          |                      |



1  
2  
3  
4  
5  
6  
7  
8  
9  
10  
11  
12  
13  
14  
15  
16  
17  
18  
19  
20  
21  
22  
23  
24  
25  
26  
27  
28  
29  
30  
31  
32  
33  
34  
35  
36  
37  
38  
39  
40  
41  
42  
43  
44  
45  
46  
47

15  
16

|  |  |  |  |
|--|--|--|--|
|  |  |  |  |
|  |  |  |  |

For peer review only



A) Long-term county PM<sub>2.5</sub> (7yr average)



B) 20% of county days are above PM<sub>2.5</sub> (80th percentile)

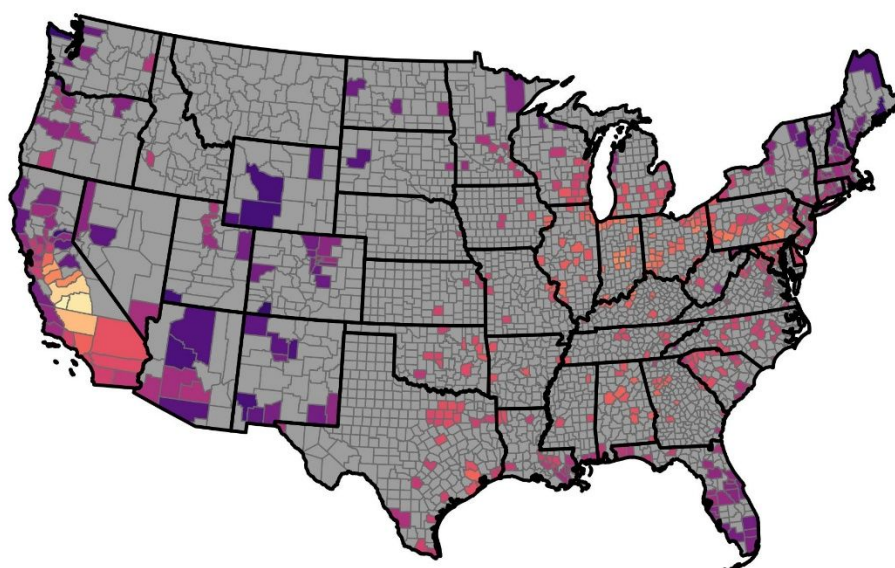

17

1  
2  
3 18 **Figure S1.** County PM<sub>2.5</sub> levels for the 530 counties included in the study. PM<sub>2.5</sub> levels shown  
4  
5 19 include the A) long-term average and B) 80th percentile (indicating that 20% of county days are  
6  
7 20 at or above this PM<sub>2.5</sub> level) for the years 2008-2014.  
8  
9  
10 21

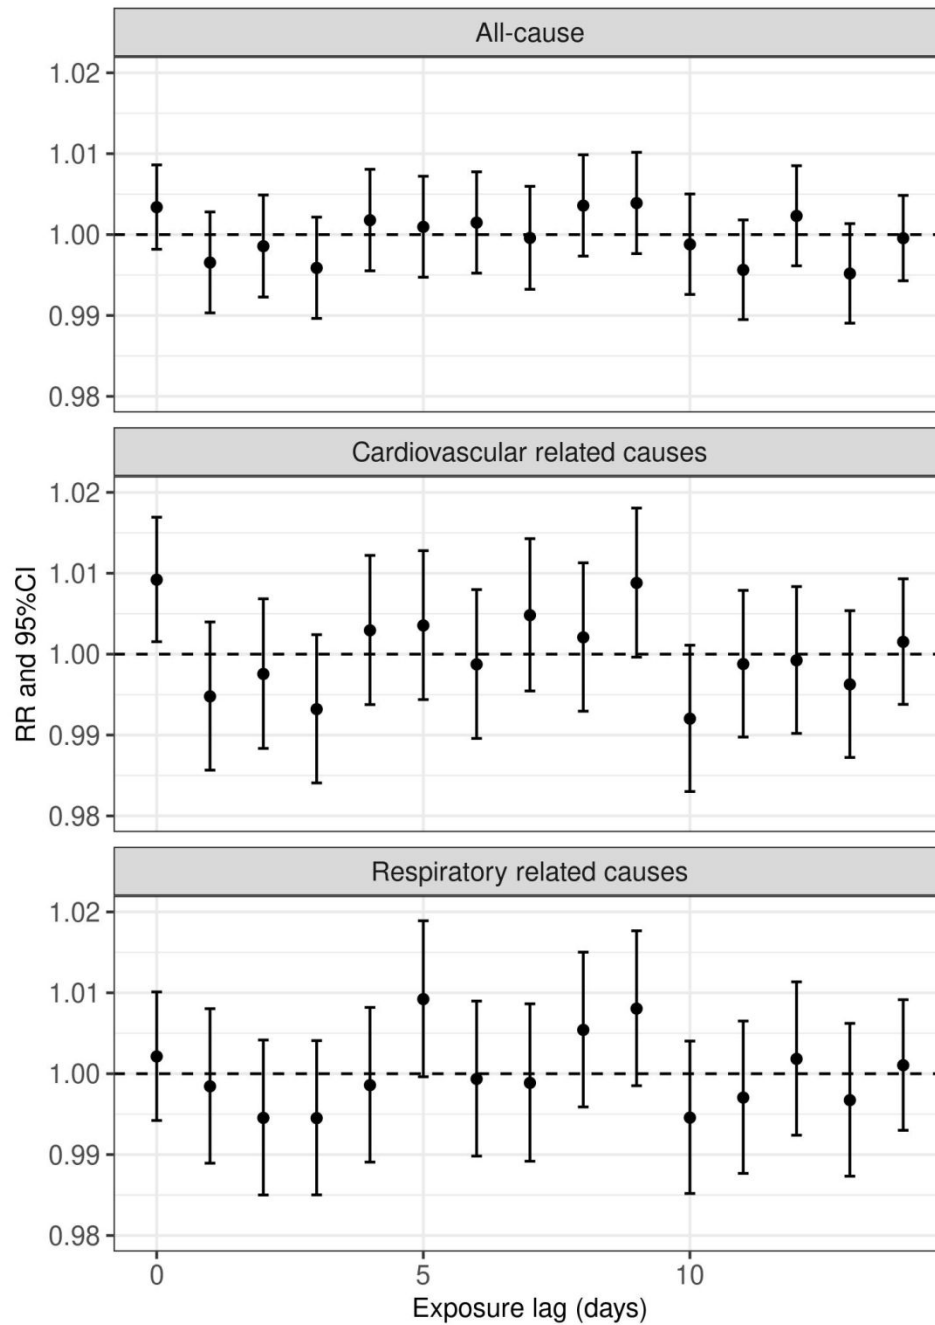

22

1  
2  
3 23 **Figure S2.** Relative risk (RR  $\pm$  95%CI) for daily county admission rates for all-cause  
4  
5 24 hospitalization associated with a 10  $\mu\text{g}/\text{m}^3$  increase in  $\text{PM}_{2.5}$  for exposure lags 0-14 days using  
6  
7 25 an unconstrained distributed lag model (Table S1).  
8  
9  
10 26  
11  
12 27  
13  
14  
15  
16  
17  
18  
19  
20  
21  
22  
23  
24  
25  
26  
27  
28  
29  
30  
31  
32  
33  
34  
35  
36  
37  
38  
39  
40  
41  
42  
43  
44  
45  
46  
47  
48  
49  
50  
51  
52  
53  
54  
55  
56  
57  
58  
59  
60

For peer review only

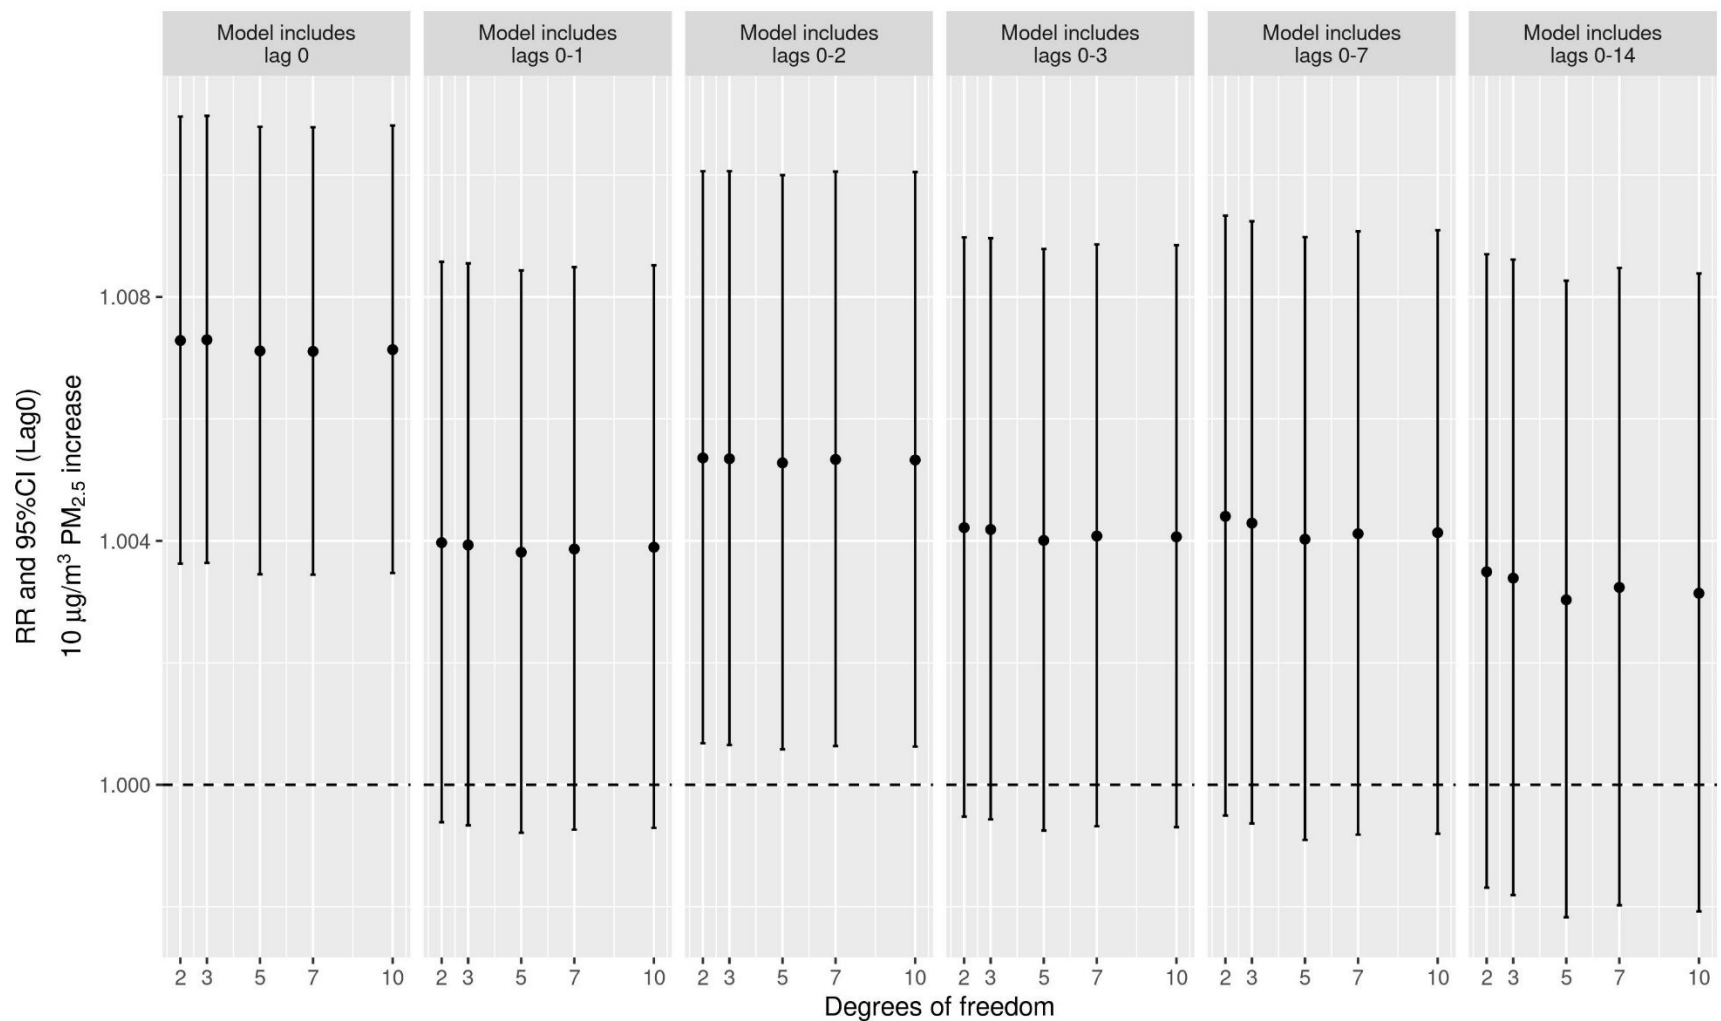

28

29 **Figure S3.** Sensitivity analysis for all-cause admissions models showing the impact on the lag 0 estimate from changing the number  
 30 of lags considered (grouped figures), and the number of degrees of freedom (x-axis) for the temperature and relative humidity  
 31 variables. Relative risk (RR ± 95%CI) of all-cause daily county admission rates associated with a 10 µg/m³ increase in PM<sub>2.5</sub> on lag 0.

32



33

34 **Figure S4.** Sensitivity analysis for all-cause readmission models showing the impact on the lag 0 estimate from changing the number  
 35 of degrees of freedom (x-axis) for the temperature and relative humidity variables. Relative risk (RR ± 95%CI) of all-cause daily  
 36 county admission rates associated with a 10 µg/m<sup>3</sup> increase in PM<sub>2.5</sub> on lag 0.

1  
2  
3  
4  
5  
6  
7  
8  
9  
10  
11  
12  
13  
14  
15  
16  
17  
18  
19  
20  
21  
22  
23  
24  
25  
26  
27  
28  
29  
30  
31  
32  
33  
34  
35  
36  
37  
38  
39  
40  
41  
42  
43  
44  
45  
46  
47

STROBE Statement—Checklist of items that should be included in reports of *cohort studies*

|                              | Item No | Recommendation                                                                                                                                                                                                                                                                                                         | Page No |
|------------------------------|---------|------------------------------------------------------------------------------------------------------------------------------------------------------------------------------------------------------------------------------------------------------------------------------------------------------------------------|---------|
| <b>Title and abstract</b>    | 1       | (a) Indicate the study's design with a commonly used term in the title or the abstract<br>(b) Provide in the abstract an informative and balanced summary of what was done and what was found                                                                                                                          | 1-3     |
| <b>Introduction</b>          |         |                                                                                                                                                                                                                                                                                                                        |         |
| Background/rationale         | 2       | Explain the scientific background and rationale for the investigation being reported                                                                                                                                                                                                                                   | 5       |
| Objectives                   | 3       | State specific objectives, including any prespecified hypotheses                                                                                                                                                                                                                                                       | 5-6     |
| <b>Methods</b>               |         |                                                                                                                                                                                                                                                                                                                        |         |
| Study design                 | 4       | Present key elements of study design early in the paper                                                                                                                                                                                                                                                                | 6       |
| Setting                      | 5       | Describe the setting, locations, and relevant dates, including periods of recruitment, exposure, follow-up, and data collection                                                                                                                                                                                        | 6       |
| Participants                 | 6       | (a) Give the eligibility criteria, and the sources and methods of selection of participants. Describe methods of follow-up<br>(b) For matched studies, give matching criteria and number of exposed and unexposed                                                                                                      | 6       |
| Variables                    | 7       | Clearly define all outcomes, exposures, predictors, potential confounders, and effect modifiers. Give diagnostic criteria, if applicable                                                                                                                                                                               | 7-8     |
| Data sources/<br>measurement | 8*      | For each variable of interest, give sources of data and details of methods of assessment (measurement). Describe comparability of assessment methods if there is more than one group                                                                                                                                   | 7-8     |
| Bias                         | 9       | Describe any efforts to address potential sources of bias                                                                                                                                                                                                                                                              | 7-9     |
| Study size                   | 10      | Explain how the study size was arrived at                                                                                                                                                                                                                                                                              | 7-8     |
| Quantitative variables       | 11      | Explain how quantitative variables were handled in the analyses. If applicable, describe which groupings were chosen and why                                                                                                                                                                                           | 8-9     |
| Statistical methods          | 12      | (a) Describe all statistical methods, including those used to control for confounding<br>(b) Describe any methods used to examine subgroups and interactions<br>(c) Explain how missing data were addressed<br>(d) If applicable, explain how loss to follow-up was addressed<br>(e) Describe any sensitivity analyses | 8-9     |
| <b>Results</b>               |         |                                                                                                                                                                                                                                                                                                                        |         |
| Participants                 | 13*     | (a) Report numbers of individuals at each stage of study—eg numbers potentially eligible, examined for eligibility, confirmed eligible, included in the study, completing follow-up, and analysed<br>(b) Give reasons for non-participation at each stage<br>(c) Consider use of a flow diagram                        | 9       |
| Descriptive data             | 14*     | (a) Give characteristics of study participants (eg demographic, clinical, social) and information on exposures and potential confounders<br>(b) Indicate number of participants with missing data for each variable of interest<br>(c) Summarise follow-up time (eg, average and total amount)                         | 9-10    |
| Outcome data                 | 15*     | Report numbers of outcome events or summary measures over time                                                                                                                                                                                                                                                         | 10      |

|    |                          |    |                                                                                                                                                                                                              |       |
|----|--------------------------|----|--------------------------------------------------------------------------------------------------------------------------------------------------------------------------------------------------------------|-------|
| 1  | Main results             | 16 | (a) Give unadjusted estimates and, if applicable, confounder-adjusted estimates and their precision (eg, 95% confidence interval). Make clear which confounders were adjusted for and why they were included | 10-12 |
| 2  |                          |    | (b) Report category boundaries when continuous variables were categorized                                                                                                                                    |       |
| 3  |                          |    | (c) If relevant, consider translating estimates of relative risk into absolute risk for a meaningful time period                                                                                             |       |
| 4  |                          |    |                                                                                                                                                                                                              |       |
| 5  |                          |    |                                                                                                                                                                                                              |       |
| 6  |                          |    |                                                                                                                                                                                                              |       |
| 7  |                          |    |                                                                                                                                                                                                              |       |
| 8  |                          |    |                                                                                                                                                                                                              |       |
| 9  | Other analyses           | 17 | Report other analyses done—eg analyses of subgroups and interactions, and sensitivity analyses                                                                                                               | 12    |
| 10 |                          |    |                                                                                                                                                                                                              |       |
| 11 | <b>Discussion</b>        |    |                                                                                                                                                                                                              |       |
| 12 |                          |    |                                                                                                                                                                                                              |       |
| 13 | Key results              | 18 | Summarise key results with reference to study objectives                                                                                                                                                     | 12-13 |
| 14 |                          |    |                                                                                                                                                                                                              |       |
| 15 | Limitations              | 19 | Discuss limitations of the study, taking into account sources of potential bias or imprecision. Discuss both direction and magnitude of any potential bias                                                   | 15-16 |
| 16 |                          |    |                                                                                                                                                                                                              |       |
| 17 | Interpretation           | 20 | Give a cautious overall interpretation of results considering objectives, limitations, multiplicity of analyses, results from similar studies, and other relevant evidence                                   | 13-16 |
| 18 |                          |    |                                                                                                                                                                                                              |       |
| 19 |                          |    |                                                                                                                                                                                                              |       |
| 20 | Generalisability         | 21 | Discuss the generalisability (external validity) of the study results                                                                                                                                        | 16    |
| 21 |                          |    |                                                                                                                                                                                                              |       |
| 22 | <b>Other information</b> |    |                                                                                                                                                                                                              |       |
| 23 | Funding                  | 22 | Give the source of funding and the role of the funders for the present study and, if applicable, for the original study on which the present article is based                                                | 17    |
| 24 |                          |    |                                                                                                                                                                                                              |       |
| 25 |                          |    |                                                                                                                                                                                                              |       |

\*Give information separately for exposed and unexposed groups.

**Note:** An Explanation and Elaboration article discusses each checklist item and gives methodological background and published examples of transparent reporting. The STROBE checklist is best used in conjunction with this article (freely available on the Web sites of PLoS Medicine at <http://www.plosmedicine.org/>, Annals of Internal Medicine at <http://www.annals.org/>, and Epidemiology at <http://www.epidem.com/>). Information on the STROBE Initiative is available at <http://www.strobe-statement.org>.



# BMJ Open

## Association of short-term exposure to ambient PM2.5 with hospital admissions and 30-day readmissions in end-stage renal disease patients: population based retrospective cohort study

|                                 |                                                                                                                                                                                                                                                                                                                                                                                                                                                                                                                                                                                                                                                                                                                                                                                                                                                                                                                                  |
|---------------------------------|----------------------------------------------------------------------------------------------------------------------------------------------------------------------------------------------------------------------------------------------------------------------------------------------------------------------------------------------------------------------------------------------------------------------------------------------------------------------------------------------------------------------------------------------------------------------------------------------------------------------------------------------------------------------------------------------------------------------------------------------------------------------------------------------------------------------------------------------------------------------------------------------------------------------------------|
| Journal:                        | <i>BMJ Open</i>                                                                                                                                                                                                                                                                                                                                                                                                                                                                                                                                                                                                                                                                                                                                                                                                                                                                                                                  |
| Manuscript ID                   | bmjopen-2020-041177.R1                                                                                                                                                                                                                                                                                                                                                                                                                                                                                                                                                                                                                                                                                                                                                                                                                                                                                                           |
| Article Type:                   | Original research                                                                                                                                                                                                                                                                                                                                                                                                                                                                                                                                                                                                                                                                                                                                                                                                                                                                                                                |
| Date Submitted by the Author:   | 22-Oct-2020                                                                                                                                                                                                                                                                                                                                                                                                                                                                                                                                                                                                                                                                                                                                                                                                                                                                                                                      |
| Complete List of Authors:       | Wyatt, Lauren; US Environmental Protection Agency Research Triangle Park Campus, Center for Public Health and Environmental Assessment<br>Xi, Yuzhi; US Environmental Protection Agency (ORISE)<br>Kshirsagar, Abhijit; University of North Carolina Kidney Center and Division of Nephrology and Hypertension<br>Di, Qian; Tsinghua University<br>Ward-Caviness, Cavin; US Environmental Protection Agency Research Triangle Park Campus, Center for Public Health and Environmental Assessment<br>Wade, Timothy; US Environmental Protection Agency Research Triangle Park Campus, Center for Public Health and Environmental Assessment<br>Cascio, Wayne E.; US Environmental Protection Agency Research Triangle Park Campus, Center for Public Health and Environmental Assessment<br>Rappold, Ana; US Environmental Protection Agency Research Triangle Park Campus, Center for Public Health and Environmental Assessment |
| <b>Primary Subject Heading</b>: | Epidemiology                                                                                                                                                                                                                                                                                                                                                                                                                                                                                                                                                                                                                                                                                                                                                                                                                                                                                                                     |
| Secondary Subject Heading:      | Public health                                                                                                                                                                                                                                                                                                                                                                                                                                                                                                                                                                                                                                                                                                                                                                                                                                                                                                                    |
| Keywords:                       | EPIDEMIOLOGY, PUBLIC HEALTH, NEPHROLOGY                                                                                                                                                                                                                                                                                                                                                                                                                                                                                                                                                                                                                                                                                                                                                                                                                                                                                          |
|                                 |                                                                                                                                                                                                                                                                                                                                                                                                                                                                                                                                                                                                                                                                                                                                                                                                                                                                                                                                  |

SCHOLARONE™  
Manuscripts

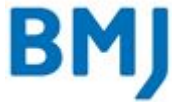

I, the Submitting Author has the right to grant and does grant on behalf of all authors of the Work (as defined in the below author licence), an exclusive licence and/or a non-exclusive licence for contributions from authors who are: i) UK Crown employees; ii) where BMJ has agreed a CC-BY licence shall apply, and/or iii) in accordance with the terms applicable for US Federal Government officers or employees acting as part of their official duties; on a worldwide, perpetual, irrevocable, royalty-free basis to BMJ Publishing Group Ltd ("BMJ") its licensees and where the relevant Journal is co-owned by BMJ to the co-owners of the Journal, to publish the Work in this journal and any other BMJ products and to exploit all rights, as set out in our [licence](#).

The Submitting Author accepts and understands that any supply made under these terms is made by BMJ to the Submitting Author unless you are acting as an employee on behalf of your employer or a postgraduate student of an affiliated institution which is paying any applicable article publishing charge ("APC") for Open Access articles. Where the Submitting Author wishes to make the Work available on an Open Access basis (and intends to pay the relevant APC), the terms of reuse of such Open Access shall be governed by a Creative Commons licence – details of these licences and which [Creative Commons](#) licence will apply to this Work are set out in our licence referred to above.

Other than as permitted in any relevant BMJ Author's Self Archiving Policies, I confirm this Work has not been accepted for publication elsewhere, is not being considered for publication elsewhere and does not duplicate material already published. I confirm all authors consent to publication of this Work and authorise the granting of this licence.

1  
2  
3 1 **Title**  
4

5 2 Association of short-term exposure to ambient PM<sub>2.5</sub> with hospital admissions and 30-day  
6  
7 3 readmissions in end-stage renal disease patients: population based retrospective cohort study  
8  
9 4

10  
11 5 **Author's names**  
12

13 6 Lauren H Wyatt (0000-0002-4926-2058), Yuzhi Xi, Abhijit V Kshirsagar, Qian Di (0000-0002-  
14  
15 7 1584-4770), Cavin Ward-Caviness (0000-0002-6322-4349), Timothy J Wade, Wayne E Cascio,  
16  
17 8 Ana G Rappold (0000-0002-7696-0900)  
18  
19 9

20  
21  
22 10 **Author's addresses and positions**  
23

24 11 Center for Public Health and Environmental Assessment, Office of Research and Development,  
25  
26 12 United States Environmental Protection Agency, Research Triangle Park, NC, USA Lauren H  
27  
28 13 Wyatt postdoctoral research fellow  
29

30 14 Oak Ridge Institute for Science and Education at the United States Environmental Protection  
31  
32 15 Agency, Research Triangle Park, NC, USA Yuzhi Xi doctoral student  
33

34 16 University of North Carolina Kidney Center and Division of Nephrology and Hypertension, UNC  
35  
36 17 at Chapel Hill, Chapel Hill, NC, USA Abhijit V Kshirsagar nephrologist  
37  
38

39 18 Research Center for Public Health, School of Medicine, Tsinghua University, Beijing, China  
40  
41 19 Qian Di assistant professor  
42

43 20 Center for Public Health and Environmental Assessment, Office of Research and Development,  
44  
45 21 United States Environmental Protection Agency, Research Triangle Park, NC, USA Cavin  
46  
47 22 Ward-Caviness computational biologist  
48

49 23 Center for Public Health and Environmental Assessment, Office of Research and Development,  
50  
51 24 United States Environmental Protection Agency, Research Triangle Park, NC, USA Timothy J  
52  
53 25 Wade supervisory health scientist  
54  
55  
56  
57  
58  
59  
60

1  
2  
3 26 Center for Public Health and Environmental Assessment, Office of Research and Development,  
4  
5 27 United States Environmental Protection Agency, Research Triangle Park, NC, USA Wayne E  
6  
7 28 Cascio supervisory health scientist  
8

9  
10 29 Center for Public Health and Environmental Assessment, Office of Research and Development,  
11  
12 30 United States Environmental Protection Agency, Research Triangle Park, NC, USA Ana G  
13  
14 31 Rappold statistician  
15

16 32

17  
18 33 **Corresponding author**

19  
20 34 Correspondence to: Ana G Rappold rappold.ana@epa.gov, 919-843-9504, 109 TW Alexander  
21  
22 35 Drive, Mailbox 58B, Research Triangle Park, NC 27709  
23

24 36

25  
26 37 Manuscript word count: 3439  
27

28 38 Abstract word count: 285  
29

30 39

31  
32  
33 40 **Abstract**

34  
35 41 **Objectives:** To examine the effect of short-term exposure to ambient fine particulate matter  
36  
37 42 (PM<sub>2.5</sub>) on all-cause, cardiovascular, and respiratory related hospital admissions and  
38  
39 43 readmissions among patients receiving outpatient hemodialysis.  
40

41 44 **Design:** Retrospective cohort study.  
42

43 45 **Setting:** Inpatient hospitalization claims identified from the United States Renal Data System in  
44  
45 46 530 US counties.  
46

47 47 **Participants:** All patients receiving in-center hemodialysis between 2008 and 2014.  
48

49 48 **Primary and secondary outcome measures:** Risk of all-cause, cardiovascular, and  
50  
51 49 respiratory related hospital admissions and 30-day all-cause and cause-specific readmission  
52  
53 50 following an all-cause, cardiovascular, and respiratory related discharges. Readmission risk was  
54  
55

1  
2  
3 51 evaluated for early (1-7 days post-discharge) and late (8-30 days post-discharge) readmission  
4  
5 52 time-periods. Relative risk is expressed per 10  $\mu\text{g}/\text{m}^3$  of  $\text{PM}_{2.5}$ .  
6

7 53 **Results:** Same day ambient  $\text{PM}_{2.5}$  was associated with increased hospital admission risk for  
8  
9 54 cardiovascular causes (0.9%, 95%CI: [0.2, 1.7]). Greater  $\text{PM}_{2.5}$ -related associations were  
10  
11 55 observed with 30-day readmission risk. Early-readmission risk was increased by 1.6-1.8%  
12  
13 56 following all-cause (1.6%, [0.6, 2.6]), cardiovascular (1.8%, [0.4, 3.2]), and respiratory (1.8%,  
14  
15 [0.4, 3.2]) discharges; while late-readmission risk increased by 1.2-1.3% following all-cause and  
16  
17 57 cardiovascular discharges.  $\text{PM}_{2.5}$ -related associations with readmission risk were greatest for  
18  
19 58 certain cause-specific readmissions ranging 4.0-6.5% for dysrhythmia and conduction disorder,  
20  
21 59 heart failure, COPD, other non-cardiac chest pain or respiratory syndrome, and pneumonia.  
22  
23 60 Following all-cause discharges, the cause-specific early-readmission risk was increased by  
24  
25 61 6.5% (3.5, 9.6) for pneumonia, 4.8% (2.3, 7.4) for dysrhythmia and conduction disorder, 3.7%  
26  
27 62 (1.4, 6.0) for heart failure, and 2.7% (1.2, 4.2) for other non-cardiac chest pain or respiratory  
28  
29 63 syndrome related causes.  
30  
31 64

32 65 **Conclusions:** Daily ambient  $\text{PM}_{2.5}$  was associated with an increased risk of cardiovascular  
33  
34 66 admissions and 30-day readmissions following cardiopulmonary-related discharges in a  
35  
36 67 vulnerable ESRD population. In the first week following discharge, greater  $\text{PM}_{2.5}$ -related risk of  
37  
38 68 rehospitalization was identified for some diagnoses.  
39  
40  
41  
42

#### 43 70 **Strengths and limitations of this study**

- 44 71 • Nearly complete representation of hospitalization records (> 1.8 million inpatient  
45  
46 72 admissions), identified using the US Renal Data System, of patients undergoing in-  
47  
48 73 center hemodialysis between 2008 and 2014.
- 49  
50 74 • Location of last dialysis visit was linked with daily population-weighted air pollution.
- 51  
52 75 • Admission risk estimated using time and county stratified design to control for county-  
53  
54 76 level time trends.
- 55  
56  
57  
58  
59  
60

- 1  
2  
3 77 • Cox proportional hazard model with time-varying exposure was used to estimate  
4  
5 78 readmission risk associated with daily fluctuations in ambient PM<sub>2.5</sub> controlled for time-  
6  
7 79 varying confounders.  
8  
9  
10 80 • Potential diagnosis misclassification from using diagnosis codes to classify cause-  
11  
12 81 specific hospitalizations and exposure misclassification related to PM<sub>2.5</sub> exposure not  
13  
14 82 captured by ambient air quality near dialysis centers.  
15  
16 83

For peer review only

## 84 Introduction

85 Ambient fine particulate matter (PM<sub>2.5</sub>) is a leading risk factor for all-cause mortality<sup>1-4</sup>,  
86 accounting for millions of premature deaths each year<sup>5</sup>. Daily variation in ambient PM<sub>2.5</sub> is also  
87 associated with increased rates of unplanned hospital admissions, urgent care visits, and  
88 medication usage<sup>6,7</sup>. Greater health impacts have been observed consistently in sensitive  
89 populations, including the elderly and individuals with chronic health conditions such as chronic  
90 kidney disease (CKD)<sup>3,8-11</sup>. Additionally, PM<sub>2.5</sub> exposure during wildfire periods has been shown  
91 to increase the risk of mortality among patients managing their end stage renal disease with  
92 hemodialysis<sup>12</sup>. However, the role of short-term PM<sub>2.5</sub> exposure at ambient levels on  
93 progression of disease and cause-specific morbidities has not been characterized.

94  
95 CKD is a progressive condition that affects 8 to 16% of the population worldwide<sup>13-15</sup>, and in the  
96 final stage, end-stage renal disease (ESRD), many patients are transitioned to hemodialysis to  
97 prolong life. Patients receiving dialysis represent a particularly vulnerable population because of  
98 high rates of co-morbidities, including diabetes and cardiovascular disease, which may  
99 contribute to the greater likelihood of hospital admission and readmission following PM  
100 exposure. In the US, patients on hemodialysis average 1.7 inpatient admissions annually with a  
101 30-day readmission rate twice that of other Medicare beneficiaries<sup>16</sup>, contributing to a  
102 substantial economic impact<sup>17</sup>. In 2016, \$35.4 billion in Medicare fee-for-service costs were  
103 attributed to ESRD<sup>16</sup>, motivating health promotion and cost-containment efforts to slow the  
104 progression of CKD and reduce hospitalizations and readmissions<sup>18</sup>. While many current  
105 strategies to reduce hospitalizations focus on care processes and patient-level factors<sup>19-22</sup>,  
106 there is a knowledge gap on the role of modifiable environmental risk factors - specifically  
107 ambient PM<sub>2.5</sub><sup>2,23-25</sup>.

108

1  
2  
3 109 In this study, we examined the risk of daily hospitalization and subsequent 30-day readmission  
4  
5 110 in relation to daily ambient PM<sub>2.5</sub> using data from the US Renal Data System (USRDS) over a 7-  
6  
7 111 year period. We focused on all-cause, cardiovascular, and respiratory hospitalizations and  
8  
9 112 estimated changes in risk for early (1 to 7 days post-discharge) and late (8 to 30 days post-  
10  
11 113 discharge) readmission accounting for the influence of different causal factors (i.e. acute and  
12  
13 114 chronic illness burden) that may influence early versus late-readmissions <sup>26 27</sup>.  
15  
16 115

## 17 18 116 **Methods**

### 19 20 117 **Setting and study population**

21  
22 118 Using patient level data from the USRDS, we constructed an open cohort of individuals  
23  
24 119 receiving in-center hemodialysis between 2008 and 2014. USRDS is a national data registry for  
25  
26 120 dialysis services and includes records of patient demographic characteristics, hospitalizations,  
27  
28 121 and provider information on all patients receiving hemodialysis. Baseline demographic  
29  
30 122 characteristics (sex, birth date, race, and smoking status) recorded at the initiation of dialysis  
31  
32 123 were extracted from the Medical Evidence Form CMS-2728 for each patient. For every inpatient  
33  
34 124 hospital visit, we extracted the admission date, discharge date, discharge diagnoses codes, and  
35  
36 125 discharge status.  
37  
38 126

39  
40  
41 127 For the analysis of 30-day readmission risk, we considered only admissions where patients  
42  
43 128 were discharged alive. Each readmission was counted once as a readmission relative to the  
44  
45 129 prior index admissions and was then considered as a new index admission. Thus, each  
46  
47 130 admission could serve as both an index admission and readmission, consistent with previous  
48  
49 131 studies <sup>28</sup>. An admission that occurred on the same day as a discharge was combined with the  
50  
51 132 previous admission. These readmissions are likely to represent facility transfers for which we  
52  
53 133 were not able to obtain information. Discharges occurring within 30 days of the end of the study  
54  
55 134 period were excluded, as 30 days of follow-up data were not available. For both admissions and



1  
2  
3 135 readmissions, patients could be represented more than once if they were admitted multiple  
4  
5 136 times during the study period.  
6

7 137

8  
9 138 Health outcomes

10  
11 139 The primary outcomes included daily counts of all-cause, respiratory, and cardiovascular-related  
12  
13 140 admissions and the time to readmission following the cause-specific discharges. All-cause and  
14  
15 141 cause-specific readmissions were examined separately. Readmissions were classified further  
16  
17 142 as early-readmissions, occurring within 1 to 7 days of an index hospitalization discharge, and  
18  
19 143 late-readmissions, occurring 8 to 30 days post-discharge.  
20  
21

22 144

23  
24 145 International Classification of Diseases, 9<sup>th</sup> Revision (ICD-9) codes were used to identify cause-  
25  
26 146 specific hospitalizations. Cardiovascular-related diagnoses included hypertension (ICD-9 codes  
27  
28 147 401-405), myocardial infarction (410), ischemic heart disease (410-411, 413), pulmonary  
29  
30 148 embolism (415), dysrhythmia and conduction disorder (426-427), heart failure (428), and  
31  
32 149 peripheral arterial disease (444). Respiratory-related diagnoses included asthma (493), chronic  
33  
34 150 obstructive pulmonary disease (491-492, 496), pneumonia (480-486), and other non-cardiac  
35  
36 151 chest pain or respiratory syndrome (786).  
37  
38

39 152

40  
41 153 Environmental data

42  
43 154 Daily concentrations of fine particulate matter (PM<sub>2.5</sub>) were estimated using a previously  
44  
45 155 described exposure prediction model<sup>29 30</sup>. Briefly, this model estimates daily PM<sub>2.5</sub> on a 1 km  
46  
47 156 grid for the entire continental US by incorporating satellite aerosol optical depth measurements,  
48  
49 157 chemical transport model simulations, meteorology, land-use, and other variables. Gridded  
50  
51 158 PM<sub>2.5</sub> estimates were subsequently converted to population-weighted county-level estimates  
52  
53 159 using 2010 Census tract population values. To enable adjustment for potential confounding by  
54  
55 160 weather conditions, temperature and relative humidity data were obtained from the National  
56  
57

1  
2  
3 161 Centers for Environmental Information's Global Historical Climatology Network (Global Surface  
4  
5 162 Summary of the Day)<sup>31</sup> and using the Community Multiscale Air Quality model, respectively.  
6  
7 163 The study area was restricted to all counties containing at least one land surface station from  
8  
9 164 the Global Historical Climatology Network (n = 530).  
10

11 165  
12  
13 166 Daily PM<sub>2.5</sub> was linked to patient hospitalizations based on the county of their last dialysis visit.  
14  
15 167 Previous work has shown that patients in the USRDS cohort that receive in-center dialysis three  
16  
17 168 times a week have a median travel distance of 5.7 miles to their initial dialysis center<sup>32 33</sup>.  
18  
19

#### 20 169 21 22 170 Study design and statistical analysis

23  
24 171 *Daily county hospital admissions.* The relative risks of hospital admissions associated with daily  
25  
26 172 PM<sub>2.5</sub> were estimated using a case-crossover design with conditional Poisson models for each  
27  
28 173 of the three health outcomes separately (all-cause, cardiovascular, respiratory). Aggregated  
29  
30 174 counts of daily admissions were time stratified by county-day, where each county served as its  
31  
32 175 own control. For each county-day strata, PM<sub>2.5</sub> on the day of admission was compared with  
33  
34 176 PM<sub>2.5</sub> concentrations on control days. Control days were defined as occurring on the same day  
35  
36 177 of the week in the same month and year. This, by design, enabled us to control for differences  
37  
38 178 in county characteristics, such as population size and risk characteristics, and the influence of  
39  
40 179 day of the week, seasonal, and long-term time trends<sup>34</sup>.  
41  
42

43 180  
44  
45 181 The relative risk of hospital admissions related to daily PM<sub>2.5</sub> for each health outcome was  
46  
47 182 estimated using daily counts with respect to county-time strata, adjusted for meteorological  
48  
49 183 conditions (temperature and humidity). Temperature and humidity effects were averaged over  
50  
51 184 lag days 0, 1, and 2 and modeled using natural splines (df = 3) to allow for non-linear effects<sup>35</sup>.  
52  
53

54 185  
55  
56  
57  
58  
59  
60

1  
2  
3 186 We evaluated immediate (same day) and delayed PM<sub>2.5</sub> effects on all-cause and cause-specific  
4  
5 187 hospital admissions. Unconstrained distributed lag models were used to assess the delayed  
6  
7 188 effects of short-term exposures to PM<sub>2.5</sub>. Delayed exposure up to 14 days and models stratified  
8  
9 189 on county socioeconomic status were considered. To assess the impact of county  
10  
11 190 socioeconomic level, we used the percent of individuals below poverty from the 2010 US  
12  
13 191 Census. Associations were assessed for counties both above and below the median poverty  
14  
15 192 level (12.5%).

16  
17  
18 193 *Early and late readmissions occurring within 30 days of discharge.* Cox proportional hazards  
19  
20 194 models were used to assess the relative risk of early (1 to 7 days post-discharge) and late (8 to  
21  
22 195 30 days post-discharge) readmission associated with daily PM<sub>2.5</sub> following all-cause and cause-  
23  
24 196 specific index hospitalizations. Early-readmission models were censored at 7 days and late-  
25  
26 197 readmission models at 30 days.

27  
28 198  
29  
30 199 Models for readmissions incorporated both time-dependent and time-independent risk factors.  
31  
32 200 Time-dependent variables included daily PM<sub>2.5</sub>, daily temperature, daily relative humidity, and  
33  
34 201 day-of-the-week. Time-independent factors included patient-specific, hospitalization event-  
35  
36 202 specific, and county socioeconomic variables. Patient-specific variables included indicator of  
37  
38 203 sex, race, baseline smoking status, whether the patient had three or more previous hospital  
39  
40 204 visits in the year prior, and age at discharge. Event-specific variables included whether the  
41  
42 205 discharge occurred on a holiday and length of stay. To adjust for county socioeconomic level,  
43  
44 206 the percent of individuals below poverty was included as a covariate. Models were also adjusted  
45  
46 207 for patient-specific clusters to account for repeated measures by individual. Lastly, models were  
47  
48 208 adjusted for the competing cause of death by including death as an additional censoring criteria.  
49  
50 209 The presented models represent the cause-specific readmission hazard. Non-linear PM<sub>2.5</sub>  
51  
52 210 associations were also explored.  
53  
54 211

1  
2  
3 212 Daily county admission and readmission risks were expressed as the rate ratio (RR) per 10-  
4  
5 213  $\mu\text{g}/\text{m}^3$  increase in  $\text{PM}_{2.5}$ . The proportion hospital admissions and readmissions associated with  
6  
7 214  $\text{PM}_{2.5}$  is reported as the attributable fraction (AF), where  $\text{AF} = (\text{RR}-1) / \text{RR}$  <sup>36</sup>. All statistical  
8  
9 215 analyses were performed with R software (version 3.6.0) <sup>37</sup>.  
10

216

## 217 **Results**

### 218 Characterization of clinical cohort and daily $\text{PM}_{2.5}$

219 Among 361,568 patients who were hospitalized during the study period, 10,274 were excluded  
20  
21 due to missing baseline demographic values, with 351,294 patients remaining. Demographic  
22  
23 descriptions are in Table 1. Patients had on average 2.97 hospital visits in the year prior to an  
24  
25 admission and more than 70% of patients had at least one hospital admission related to  
26  
27 cardiovascular and respiratory causes (Table 2). The average daily county-level  $\text{PM}_{2.5}$   
28  
29 concentration was  $9.3 \mu\text{g}/\text{m}^3$  (range: 0.05 to  $155.16 \mu\text{g}/\text{m}^3$ ) (Table S1). The highest daily  
30  
31 county-level  $\text{PM}_{2.5}$  was observed in California (Figure S1, Supplementary file).  
32

226

### 227 Description of clinical events, hospital admissions, and readmissions

36  
37 228 In total, there were 1,801,966 hospital admissions, of which 1,493,795 recorded the patient as  
38  
39 229 alive at discharge. Of admissions that were discharged alive, 11.8% were readmitted within 7  
40  
41 230 days and 21.3% were readmitted 8 to 30 days post-discharge. The mean length of stay for all-  
42  
43 231 cause, cardiovascular, and respiratory admissions was 7.0, 7.0, and 7.1 days, respectively  
44  
45 232 (Table 2).  
46

233

### 234 Associations between $\text{PM}_{2.5}$ and readmission

51  
52 235 *Early-readmission.* Daily  $\text{PM}_{2.5}$  was positively associated with increased risk for early-  
53  
54 236 readmission following all-cause, cardiovascular, and respiratory related discharges. Same day  
55  
56 237 (lag 0)  $\text{PM}_{2.5}$  was associated with a 1.6% (95%CI: 0.6, 2.6), 1.8% (95%CI: 0.4, 3.2), and 1.8%

1  
2  
3 238 (95%CI: 0.4, 3.2) increased risk of an early-readmission for any cause following all-cause,  
4  
5 239 cardiovascular, and respiratory related discharges, respectively (Figure 1, Table S2).  
6  
7 240  
8  
9 241 PM<sub>2.5</sub> associated early-readmission risk was greater for certain cause-specific outcomes.  
10  
11 242 Following all-cause discharges, same day (lag 0) PM<sub>2.5</sub> was associated with increased early-  
12  
13 243 readmission risk for dysrhythmia and conduction disorder (4.8% [2.3, 7.4]), heart failure (3.7%  
14  
15 244 [1.4, 6.0]), pneumonia 6.5% [3.5, 9.6]), and other non-cardiac chest pain or respiratory  
16  
17 245 syndrome (2.7% [1.2, 4.2]) causes. PM<sub>2.5</sub> associated early-readmission risk was greatest for  
18  
19 246 pneumonia related readmissions following cardiovascular related discharges (7.5% [3.5, 11.7]).  
20  
21 247 Other cause-specific early-readmission risks following cardiovascular and respiratory related  
22  
23 248 discharges were similar to estimates observed following discharge for any cause (Figure 2,  
24  
25 249 Table S2).  
26  
27  
28 250  
29  
30 251 An average AF at 10 µg/m<sup>3</sup> of PM<sub>2.5</sub> at lag 0 was 1.5% (95%CI: 0.6, 2.5), 1.7% (95%CI: 0.4,  
31  
32 252 3.1), and 1.7% (95%CI: 0.3, 3.2) for an early-readmission for any cause following all-cause,  
33  
34 253 cardiovascular, and respiratory discharges, respectively (Figure 3). County AF ranged 0.5-2.5%,  
35  
36 254 0.6-2.8%, and 0.6-2.8% for an early-readmission following all-cause, cardiovascular, and  
37  
38 255 respiratory related discharges, respectively (Figure 4).  
39  
40  
41 256  
42  
43 257 *Late-readmission.* Daily PM<sub>2.5</sub> was also associated with increased risk of late-readmission  
44  
45 258 following all-cause, cardiovascular, and respiratory related discharges and the magnitude of risk  
46  
47 259 related to all-cause readmissions was similar to that observed with early-readmission. Same  
48  
49 260 day PM<sub>2.5</sub> was associated with a 1.3% (95%CI: 0.6, 2.0), 1.2% (95%CI: 0.3, 2.2), and 1.0%  
50  
51 261 (95%CI: 0.01, 2.0) increased risk of a late all-cause readmission following all-cause,  
52  
53 262 cardiovascular, and respiratory related discharges, respectively (Figure 1, Table S2).  
54  
55  
56 263

264 Similar to observations made for early-readmissions, PM<sub>2.5</sub> associated late-readmission risk was  
265 greater for certain cause-specific outcomes. Following all-cause discharges, a 10 µg/m<sup>3</sup>  
266 increase in same day (lag 0) PM<sub>2.5</sub> was associated with increased late-readmission risk for  
267 dysrhythmia and conduction disorder (3.1% [1.3, 5.0]), heart failure (4.1% [2.5, 5.8]), COPD  
268 (4.6% [1.7, 7.6]), pneumonia (5.9% [3.7, 8.2]), and other non-cardiac chest pain or respiratory  
269 syndrome (3.0% [1.9, 4.1]) (Figure 2, Table S2).

270  
271 The average AF at 10 µg/m<sup>3</sup> was 0.1% (95%CI: 0.5, 1.8) and 1.0% (95%CI: 0.1, 2.0) for a late-  
272 readmission following all-cause and cardiovascular discharges, respectively (Figure 3). County  
273 AF ranged 0.3-1.9% for a late-readmission following any cause (data not shown).

274

275 Associations between PM<sub>2.5</sub> and daily admissions

276 Same day PM<sub>2.5</sub> was associated with an increase in rate ratio of 0.3% (95%CI: -0.2, 0.9) for all-  
277 cause admissions and 0.9% (95%CI: 0.2, 1.7) for cardiovascular admissions (Figure S2, Table  
278 S3, Supplementary file). We estimated 0.9% (95%CI: 0.1, 1.7) of cardiovascular admissions  
279 could be attributed to 10 µg/m<sup>3</sup> ambient PM<sub>2.5</sub> (Figure 3). Across counties, exposures accounted  
280 for 0.3% to 1.5% of cardiovascular admissions when evaluated at the average daily PM<sub>2.5</sub> for  
281 each county (data not shown).

282

283 No change in risk of all-cause and cardiovascular admissions was observed related to prior  
284 exposure (lags 1-14). Similarly, no change in risk for respiratory admissions was observed with  
285 same day exposure (lag 0) or prior exposure (lags 1-14) (Figure S2, Table S3, Supplementary  
286 file). The model with a dose-specific association for PM<sub>2.5</sub> (non-linear dose-response function)  
287 did not improve model fit. Models stratified on median percent below poverty were similar  
288 (Figure S2, Table S3, Supplementary file). In a sensitivity analysis, changing the number of

1  
2  
3 289 degrees of freedom considered for temperature and relative humidity had a negligible effect  
4  
5 290 (Figure S3, Figure S4, Supplementary file).  
6

7 291

## 9 292 **Discussion**

11 293 In a nationwide cohort study of 351,294 patients with ESRD managed with hemodialysis, we  
12  
13 294 evaluated the association between 1.8 million inpatient admissions and nearly 0.5 million  
14  
15 295 corresponding 30-day readmissions and the variation in daily ambient PM<sub>2.5</sub> in the US over 7  
16  
17 296 years, 2008-2014. Daily variation in PM<sub>2.5</sub> was associated with increased risk of hospital  
18  
19 297 admission and even greater risk of rehospitalization. Following all-cause, cardiovascular, and  
20  
21 298 respiratory related discharges, the early-readmission risk for any cause was increased by 1.6,  
22  
23 299 1.8, 1.8%, respectively per 10 µg/m<sup>3</sup> increase in daily PM<sub>2.5</sub>. Importantly, readmissions related  
24  
25 300 to some cardiorespiratory diagnoses had the greatest PM<sub>2.5</sub> attributed readmission risk that was  
26  
27 301 observed to be elevated for both early and late-readmissions. The early-readmission risk  
28  
29 302 following all-cause discharges, was increased by 6.5, 4.8, 3.7, and 2.7% for pneumonia,  
30  
31 303 dysrhythmia and conduction disorder, heart failure, and other non-cardiac chest pain or  
32  
33 304 respiratory syndrome related readmissions, respectively. Overall, these results suggest that at  
34  
35 305 10 µg/m<sup>3</sup>, 1.5-1.7% of early-readmissions for any cause were attributable to short-term  
36  
37 306 exposure. In the context of the daily PM<sub>2.5</sub> National Ambient Air Quality Standard (35 µg/m<sup>3</sup>),  
38  
39 307 this attributable fraction would be 5.3-6.0%.  
40  
41  
42

43 308

45 309 Our findings are consistent with previous studies that observed increased admission risks in  
46  
47 310 elderly populations <sup>6 9 38-42</sup> and patients with cardiovascular health complications <sup>7 43</sup>, and  
48  
49 311 increased readmission risk following cardiovascular related admissions <sup>7 43 44</sup>. Studies in the  
50  
51 312 Medicare population similarly observed a 1-2% increase in cardiovascular hospital admissions  
52  
53 313 associated with same-day PM<sub>2.5</sub> concentrations <sup>6 9 38 40</sup>. Risk appears to vary by diagnosis, as  
54  
55 314 the increased risk was slightly less (0.13%) for ST-elevation myocardial infarction related  
56  
57  
58  
59  
60

1  
2  
3 315 admissions in a Chinese population <sup>7</sup> and greater (29%) for incident heart failure admissions in  
4  
5 316 an Australian population <sup>43</sup>. Increases in respiratory admissions (1-2%) have been noted in the  
6  
7 317 Medicare population <sup>6 9 38-40</sup>, but were not observed in this study. Prior studies provide evidence  
8  
9 318 that air pollution exposure is associated with adverse health outcomes including increased  
10  
11 319 infection rates, acute lung edema, and elevated concentrations of systematic inflammation  
12  
13 320 markers <sup>45-47</sup>. Despite known associations between PM exposure and adverse cardiovascular  
14  
15 321 and respiratory health outcomes, previous studies have not evaluated the impacts on hospital  
16  
17 322 readmissions among individuals with ESRD.  
18  
19

20 323  
21  
22 324 Few studies have examined PM<sub>2.5</sub>-related effects on readmissions, and those that have report  
23  
24 325 on the long-term (>1yr) risk following cardiovascular related admissions. Following  
25  
26 326 cardiovascular hospitalization, greater PM<sub>2.5</sub>-related rehospitalization risk was observed for  
27  
28 327 some cardiac and respiratory readmissions (dysrhythmia, pneumonia) compared to our  
29  
30 328 observations of all-cause readmissions (4.3-7.5% vs 1.6%).  
31

32 329 Studies in other populations, have noted similar same-day cardiovascular related readmission  
33  
34 330 risks of 5.5-7.7% and 2.6% associated with PM<sub>2.5</sub> <sup>7</sup> and PM<sub>10</sub> <sup>44</sup>, respectively. Additionally, one  
35  
36 331 study in an Australian population with very low ambient air pollution concentrations (mean PM<sub>2.5</sub>  
37  
38 332 = 2.9 µg/m<sup>3</sup>) found no relationship between PM<sub>2.5</sub> and all-cause readmissions after an incident  
39  
40 333 heart failure hospitalization <sup>43</sup>. In some instances, short-term readmission risks were greater in  
41  
42 334 comparison to the long-term readmission risks, suggesting the week following a discharge to be  
43  
44 335 a window of heightened vulnerability. Prior work indicates that factors related to index  
45  
46 336 hospitalizations and acute illness burden are predictive of an early-readmission <sup>26 27</sup>. This may  
47  
48 337 indicate that hospital readmissions related to certain acute illness burdens may be more  
49  
50 338 susceptible to PM<sub>2.5</sub> exposure.  
51

52  
53  
54 339  
55  
56  
57  
58  
59  
60



1  
2  
3 340 Our study contributes to the currently limited literature on the association between air pollution  
4  
5 341 and health impacts among hemodialysis patients and shines a light on the vulnerability in this  
6  
7 342 clinical population related to ambient airborne particulate matter. The 30-day rehospitalization  
8  
9 343 rate is 33% in this population, which is twice that of older Medicare beneficiaries without a  
10  
11 344 kidney disease diagnosis <sup>16</sup>. As many as 70% of readmissions are thought to be unnecessary <sup>48</sup>,  
12  
13 345 prompting efforts to improve outcomes. Economic healthcare costs associated with short-term  
14  
15 346 increases in PM<sub>2.5</sub> are considerable; annual inpatient and post-acute care costs related to a 10  
16  
17 347 µg/m<sup>3</sup> in daily PM<sub>2.5</sub> ranges \$30-70 million for cardiovascular and respiratory related diseases <sup>49</sup>.  
18  
19 348 PM<sub>2.5</sub> is a modifiable risk factor and reductions in short-term exposures could contribute to  
20  
21 349 reduced healthcare costs. Our findings suggest that short-term increases in PM<sub>2.5</sub> contribute to  
22  
23 350 healthcare usage through unplanned admissions and readmissions.  
24  
25

26 351  
27  
28 352 Additionally, the findings of the study may have a broader public health implication. In the  
29  
30 353 conceptual framework for public health action, ambient airborne particulate matter fits well into  
31  
32 354 the base of a 5-tiered pyramid as a socioeconomic or social determinant of health <sup>50</sup>.  
33  
34 355 Interventions that address the base of the pyramid may provide the greatest potential impact  
35  
36 356 given the widespread population exposure of such a determinant of health like ambient airborne  
37  
38 357 particulate matter. Mitigation strategies would need to include policy initiatives to curb the  
39  
40 358 expulsion of airborne pollutants, as well as education of persons, patients, hospital staff, and  
41  
42 359 others. Areas with the higher concentrations of ambient airborne particulate matter may see the  
43  
44 360 greatest benefit from mitigation strategies.  
45  
46

47 361  
48  
49 362 Strengths and Limitations  
50  
51 363 This study included a nearly complete cohort of US patients undergoing in-center hemodialysis.  
52  
53 364 To our knowledge this is the largest analysis of short-term exposure to air pollution in the US in  
54  
55 365 this highly vulnerable population. The USRDS registry provides a complete registry of all  
56  
57

1  
2  
3 366 hospitalizations and contains detailed information regarding demographics, dialysis,  
4  
5 367 hospitalization, rehospitalization, and co-morbid conditions. Secondly, ambient PM<sub>2.5</sub> was  
6  
7 368 estimated using a prediction model with highly resolved spatial and temporal resolution with  
8  
9 369 proven accuracy<sup>29 30</sup>. Thirdly, the time-stratified design allowed for county matching that  
10  
11 370 reduced the potential confounding by factors that vary slowly with time and those that are time-  
12  
13 371 invariant. Fourthly, the use of time-dependent risk factors in the Cox proportional hazard model  
14  
15 372 allowed for readmission risk estimates to reflect the risk associated with daily fluctuations in  
16  
17 373 ambient PM<sub>2.5</sub> and time-varying confounders.  
18  
19  
20 374

21  
22 375 This study also had some limitations. Firstly, there was the potential for exposure  
23  
24 376 misclassification as the location of the last dialysis visit was used to estimate individual level  
25  
26 377 exposures. PM<sub>2.5</sub> around dialysis centers could differ from concentrations around hospitals and  
27  
28 378 patient residences. However, given that patients generally reside less than 6 miles from their  
29  
30 379 initial dialysis center, differences in temporal variation of exposure should be small and not likely  
31  
32 380 to contribute a systematic bias favoring an association between ambient PM<sub>2.5</sub> and clinical  
33  
34 381 events<sup>32 33</sup>. Secondly, diagnosis misclassification was possible but was not likely to confound  
35  
36 382 the relationship because it is not likely to vary on the same temporal scale as PM<sub>2.5</sub>. Thirdly,  
37  
38 383 there is the possibility that some unmeasured time variant factors may have confounded our  
39  
40 384 estimates (smoking status, medication usage, behaviors, lipid levels, C-reactive protein levels,  
41  
42 385 etc.). Data availability restricted the consideration of some patient level confounders, such as  
43  
44 386 smoking status, to values recorded at baseline. We used a time stratified design to control for  
45  
46 387 time-varying confounding for time scales larger than a month, such as the number of patients  
47  
48 388 enrolled in the USRDS. At scales smaller than a month, the control of person time was not  
49  
50 389 possible. Lastly, generalization of the results is limited to the Medicare population with ESRD  
51  
52 390 managed with hemodialysis treatment. Future studies are needed to understand PM<sub>2.5</sub>-related  
53  
54  
55  
56  
57  
58  
59  
60

1  
2  
3 391 impacts on specific health conditions, and if health impacts vary based on race, socioeconomic  
4  
5 392 indicators, or other individual and population factors.  
6

7 393

8  
9 394 **Conclusion**

10  
11 395 In conclusion, this United States wide cohort study identified increased risk in patients receiving  
12  
13 396 in-center hemodialysis associated with short-term increases in ambient air particle pollution.  
14  
15 397 Elevated PM<sub>2.5</sub> concentrations were found to be associated with increased inpatient hospital  
16  
17 398 admissions related to cardiovascular causes, and an increased likelihood of hospital  
18  
19 399 readmission following cardiovascular and respiratory related hospitalizations. Medicare  
20  
21 400 spending for beneficiaries with ESRD is high. Traditional efforts to reduce the burden of disease  
22  
23 401 focus on patient factors; however, these data suggest that air particle pollution is a factor that  
24  
25 402 contributes to increased risks for hospital admission and subsequent readmission. To reduce  
26  
27 403 PM<sub>2.5</sub>-related morbidities, we echo the recommendations made in the Million Hearts initiative,  
28  
29 404 that healthcare systems, insurers, physicians, and health care professionals should  
30  
31 405 incorporate health risks related to ambient PM into patient care.  
32  
33

34 406

35  
36  
37 407 **Disclaimer**

38  
39 408 The research described in this article has been reviewed by the Center for Public Health and the  
40  
41 409 Environment, U.S. Environmental Protection Agency, and approved for publication. Approval  
42  
43 410 does not signify that the contents necessarily reflect the views and policies of the Agency, nor  
44  
45 411 does the mention of trade names of commercial products constitute endorsement or  
46  
47 412 recommendation for use.  
48

49 413

50  
51 414 **Acknowledgements**

52  
53 415 The patient data reported here have been supplied by the United States Renal Data System  
54  
55 416 (USRDS). We are grateful for the high resolution ambient PM<sub>2.5</sub> data provided by Drs. Joel  
56  
57

1  
2  
3 417 Schwartz and Qian Di. The interpretation and reporting of these data are the responsibility of the  
4  
5 418 author(s) and in no way should be seen as an official policy or interpretation of the U.S.  
6  
7 419 government.  
8

9 420

### 11 421 **Contributors**

12  
13 422 LHW, AGR conceived and designed the study. TJW, WEC, and AVK provided subject expert  
14  
15 423 input into the study design and interpretation of evidence. AVK, QD, and CWC provided access  
16  
17 424 to the data for the study; LHW managed and analyzed the data and AGR oversaw the analysis.  
18  
19 425 LHW and AGR wrote the first draft of the manuscript. LHW, YX, AVK, CWC, TJW, WEC, and  
20  
21 426 AGR critically contributed to the manuscript and approved the final draft. LHW and AGR are the  
22  
23  
24  
25 427 guarantors. The corresponding author attests that all listed authors meet authorship criteria and  
26  
27  
28 428 that no others meeting the criteria have been omitted.  
29

30 429

### 32 430 **Funding**

33  
34  
35 431 This work was supported by an internal US Environmental Protection Agency grant (grant  
36  
37 432 number not applicable). The source of funding had no role in study design, data collection,  
38  
39 433 analyses, interpretation, and decision to submit the article for publication.  
40

41 434

### 43 435 **Competing Interests**

44  
45 436 All authors have completed the ICMJE uniform disclosure form at  
46  
47 437 [www.icmje.org/coi\\_disclosure.pdf](http://www.icmje.org/coi_disclosure.pdf) and declare: no support from any organisation for the  
48  
49 438 submitted work; no financial relationships with any organisations that might have an interest in  
50  
51 439 the submitted work in the previous three years; no other relationships or activities that could  
52  
53  
54 440 appear to have influenced the submitted work.  
55

56 441

### 442 **Ethical approval**

443 This study was reviewed by the institutional review board at the University of North Carolina at  
444 Chapel Hill and determined to be exempt based on the study design involving secondary data  
445 analysis (IRB Number: 20-0984).

446

### 447 **Data sharing**

448 Data access to USRDS data sets is through an internal data use agreement with the University  
449 of North Carolina at Chapel Hill's Cecil G. Sheps Center. PM<sub>2.5</sub> data was obtained through  
450 collaboration with Drs. Joel Schwartz (Harvard TH Chan School of Public Health) and Qian Di  
451 (Tsinghua University). For general data sharing inquiries, contact [rappold.ana@epa.gov](mailto:rappold.ana@epa.gov) or  
452 [wyatt.lauren@epa.gov](mailto:wyatt.lauren@epa.gov).

453

### 454 **Transparency**

455 The lead and corresponding authors (LHW and AGR) affirm that the manuscript is an honest,  
456 accurate, and transparent account of the study being reported; that no important aspects of the  
457 study have been omitted; and that any discrepancies from the study as planned (and, if  
458 relevant, registered) have been explained.

459

### 460 **Patient and Public Involvement**

461 This study utilized a deidentified database, thus contact with patients was not possible.

462

### 463 **Copyright (non-exclusive license)**

464 I Ana G Rappold The Corresponding Author of this article contained within the original  
465 manuscript which includes any diagrams & photographs within and any related or stand alone  
466 film submitted (the Contribution") has the right to grant on behalf of all authors and does grant  
467 on behalf of all authors, a licence to the BMJ Publishing Group Ltd and its licencees, to permit

1  
2  
3 468 this Contribution (if accepted) to be published in the BMJ and any other BMJ Group products  
4  
5 469 and to exploit all subsidiary rights, as set out in our licence set out at:  
6  
7 470 <http://www.bmj.com/about-bmj/resources-authors/forms-policies-and-checklists/copyright-open->  
8  
9 471 [access-and-permission-reuse](http://www.bmj.com/about-bmj/resources-authors/forms-policies-and-checklists/copyright-open-access-and-permission-reuse)

10  
11  
12 472

13  
14 473 Please tick one or more boxes as appropriate:

15  
16 474  I am the sole author of the Contribution.

17  
18 475  I am one author signing on behalf of all co-owners of the Contribution.

19  
20 476  The Contribution has been made in the course of my employment and I am signing as  
21  
22 477 authorised by my employer.

23  
24 478  I am a US Federal Government employee acting in the course of my employment.

25  
26 479  I am not a US Federal Government employee, but some or all of my co-authors are.

27  
28 480  I am an employee of the UK Crown\* acting in the course of my employment

29  
30 481  I am not an employee of the UK Crown acting in the course of my employment but some/all  
31  
32 482 of my co-authors are.\*

485 **References**

- 486 1. Cohen AJ, Brauer M, Burnett R, et al. Estimates and 25-year trends of the global burden of disease  
487 attributable to ambient air pollution: an analysis of data from the Global Burden of Diseases  
488 Study 2015. *The Lancet* 2017;389(10082):1907-18. doi: 10.1016/S0140-6736(17)30505-6
- 489 2. Brook RD, Rajagopalan S, Pope CA, 3rd, et al. Particulate matter air pollution and cardiovascular  
490 disease: An update to the scientific statement from the American Heart Association. *Circulation*  
491 2010;121(21):2331-78. doi: 10.1161/CIR.0b013e3181d8e1 [published Online First:  
492 2010/05/12]
- 493 3. Shi L, Zanobetti A, Kloog I, et al. Low-Concentration PM2.5 and Mortality: Estimating Acute and  
494 Chronic Effects in a Population-Based Study. *Environ Health Perspect* 2016;124(1):46-52. doi:  
495 10.1289/ehp.1409111 [published Online First: 2015/06/04]
- 496 4. Kloog I, Ridgway B, Koutrakis P, et al. Long- and short-term exposure to PM2.5 and mortality: using  
497 novel exposure models. *Epidemiology (Cambridge, Mass)* 2013;24(4):555-61. doi:  
498 10.1097/EDE.0b013e318294beaa [published Online First: 2013/05/17]
- 499 5. WHO WHO. Country estimates of burden of disease from ambient air pollution for 2016, 2018.
- 500 6. Dominici F, Peng RD, Bell ML, et al. Fine particulate air pollution and hospital admission for  
501 cardiovascular and respiratory diseases. *Jama* 2006;295(10):1127-34. doi:  
502 10.1001/jama.295.10.1127 [published Online First: 2006/03/09]
- 503 7. Liu H, Tian Y, Cao Y, et al. Fine particulate air pollution and hospital admissions and readmissions for  
504 acute myocardial infarction in 26 Chinese cities. *Chemosphere* 2018;192:282-88. doi:  
505 10.1016/j.chemosphere.2017.10.123 [published Online First: 2017/11/07]
- 506 8. Di Q, Dai L, Wang Y, et al. Association of Short-term Exposure to Air Pollution With Mortality in Older  
507 Adults Association of Short-term Exposure to Air Pollution With Mortality in Older  
508 Adults Association of Short-term Exposure to Air Pollution With Mortality in Older Adults. *JAMA*  
509 2017;318(24):2446-56. doi: 10.1001/jama.2017.17923
- 510 9. Bravo MA, Ebisu K, Dominici F, et al. Airborne Fine Particles and Risk of Hospital Admissions for  
511 Understudied Populations: Effects by Urbanicity and Short-Term Cumulative Exposures in 708  
512 U.S. Counties. *Environ Health Perspect* 2017;125(4):594-601. doi: 10.1289/ehp257 [published  
513 Online First: 2016/09/21]
- 514 10. Simoni M, Baldacci S, Maio S, et al. Adverse effects of outdoor pollution in the elderly. *J Thorac Dis*  
515 2015;7(1):34-45. doi: 10.3978/j.issn.2072-1439.2014.12.10
- 516 11. Ran J, Sun S, Han L, et al. Fine particulate matter and cause-specific mortality in the Hong Kong elder  
517 patients with chronic kidney disease. *Chemosphere* 2020;247:125913. doi:  
518 <https://doi.org/10.1016/j.chemosphere.2020.125913>
- 519 12. Xi Y, Kshirsagar AV, Wade TJ, et al. Mortality in US Hemodialysis Patients Following Exposure to  
520 Wildfire Smoke. *Journal of the American Society of Nephrology : JASN* 2020;31(8):1824-35. doi:  
521 10.1681/asn.2019101066 [published Online First: 2020/07/18]
- 522 13. Coresh J, Selvin E, Stevens LA, et al. Prevalence of chronic kidney disease in the United States. *Jama*  
523 2007;298(17):2038-47. doi: 10.1001/jama.298.17.2038 [published Online First: 2007/11/08]
- 524 14. Hsu CY, Vittinghoff E, Lin F, et al. The incidence of end-stage renal disease is increasing faster than  
525 the prevalence of chronic renal insufficiency. *Annals of internal medicine* 2004;141(2):95-101.  
526 doi: 10.7326/0003-4819-141-2-200407200-00007 [published Online First: 2004/07/21]
- 527 15. Cockwell P, Fisher L-A. The global burden of chronic kidney disease. *The Lancet*  
528 2020;395(10225):662-64. doi: 10.1016/S0140-6736(19)32977-0
- 529 16. USRDS USRDS. 2018 USRDS annual data report: Epidemiology of kidney disease in the United States.  
530 Bethesda, MD: National Institutes of Health, National Institute of Diabetes and Digestive and  
531 Kidney Diseases, 2018.

- 1  
2  
3 532 17. Wang V, Vilme H, Maciejewski ML, et al. The Economic Burden of Chronic Kidney Disease and End-  
4 533 Stage Renal Disease. *Seminars in nephrology* 2016;36(4):319-30. doi:  
5 534 10.1016/j.semnephrol.2016.05.008 [published Online First: 2016/08/01]  
6 535 18. Chen TK, Knicely DH, Grams ME. Chronic Kidney Disease Diagnosis and Management: A Review.  
7 536 *JAMA* 2019;322(13):1294-304. doi: 10.1001/jama.2019.14745  
8 537 19. Flythe JE, Hilbert J, Kshirsagar AV, et al. Psychosocial Factors and 30-Day Hospital Readmission  
9 538 among Individuals Receiving Maintenance Dialysis: A Prospective Study. *American journal of*  
10 539 *nephrology* 2017;45(5):400-08. doi: 10.1159/000470917 [published Online First: 2017/04/14]  
11 540 20. Perl J, McArthur E, Bell C, et al. Dialysis Modality and Readmission Following Hospital Discharge: A  
12 541 Population-Based Cohort Study. *American journal of kidney diseases : the official journal of the*  
13 542 *National Kidney Foundation* 2017;70(1):11-20. doi: 10.1053/j.ajkd.2016.10.020 [published  
14 543 Online First: 2017/01/11]  
15 544 21. Chan L, Chauhan K, Poojary P, et al. National Estimates of 30-Day Unplanned Readmissions of  
16 545 Patients on Maintenance Hemodialysis. *Clinical journal of the American Society of Nephrology :*  
17 546 *CJASN* 2017;12(10):1652-62. doi: 10.2215/cjn.02600317 [published Online First: 2017/10/04]  
18 547 22. Lin Y, Yang C, Chu H, et al. Association between the Charlson Comorbidity Index and the risk of 30-  
19 548 day unplanned readmission in patients receiving maintenance dialysis. *BMC nephrology*  
20 549 2019;20(1):363. doi: 10.1186/s12882-019-1538-0 [published Online First: 2019/10/09]  
21 550 23. USEPA USEPA. Integrated Science Assessment (ISA) for Particulate Matter, 2009.  
22 551 24. Newby DE, Mannucci PM, Tell GS, et al. Expert position paper on air pollution and cardiovascular  
23 552 disease. *European heart journal* 2014;36(2):83-93. doi: 10.1093/eurheartj/ehu458  
24 553 25. Yusuf S, Joseph P, Rangarajan S, et al. Modifiable risk factors, cardiovascular disease, and mortality in  
25 554 155 722 individuals from 21 high-income, middle-income, and low-income countries (PURE): a  
26 555 prospective cohort study. *Lancet (London, England)* 2020;395(10226):795-808. doi:  
27 556 10.1016/s0140-6736(19)32008-2 [published Online First: 2019/09/08]  
28 557 26. Graham KL, Auerbach AD, Schnipper JL, et al. Preventability of Early Versus Late Hospital  
29 558 Readmissions in a National Cohort of General Medicine Patients. *Annals of internal medicine*  
30 559 2018;168(11):766-74. doi: 10.7326/m17-1724 [published Online First: 2018/05/02]  
31 560 27. Graham KL, Wilker EH, Howell MD, et al. Differences between early and late readmissions among  
32 561 patients: a cohort study. *Annals of internal medicine* 2015;162(11):741-9. doi: 10.7326/m14-  
33 562 2159 [published Online First: 2015/06/02]  
34 563 28. Barrett M RS, Andrews R. Overview of Key Readmission Measures and Methods. 2012. HCUP  
35 564 Methods Series Report #2012-04. U.S. Agency for Healthcare Research and Quality, 2012.  
36 565 29. Makar M, Antonelli J, Di Q, et al. Estimating the Causal Effect of Low Levels of Fine Particulate Matter  
37 566 on Hospitalization. *Epidemiology (Cambridge, Mass)* 2017;28(5):627-34. doi:  
38 567 10.1097/ede.0000000000000690 [published Online First: 2017/08/03]  
39 568 30. Di Q, Kloog I, Koutrakis P, et al. Assessing PM2.5 Exposures with High Spatiotemporal Resolution  
40 569 across the Continental United States. *Environ Sci Technol* 2016;50(9):4712-21. doi:  
41 570 10.1021/acs.est.5b06121 [published Online First: 2016/03/30]  
42 571 31. NOAA. Global Surface Summary of the Day - GSOD. In: National Climatic Data Center N, NOAA, U.S.  
43 572 Department of Commerce, ed.  
44 573 32. Prakash S, Coffin R, Schold J, et al. Travel distance and home dialysis rates in the United States. *Perit*  
45 574 *Dial Int* 2014;34(1):24-32. doi: 10.3747/pdi.2012.00234  
46 575 33. Stephens JM, Brotherton S, Dunning SC, et al. Geographic disparities in patient travel for dialysis in  
47 576 the United States. *The Journal of rural health : official journal of the American Rural Health*  
48 577 *Association and the National Rural Health Care Association* 2013;29(4):339-48. doi:  
49 578 10.1111/jrh.12022 [published Online First: 2013/10/04]  
50  
51  
52  
53  
54  
55  
56  
57  
58  
59  
60



- 1  
2  
3 579 34. Carracedo-Martinez E, Taracido M, Tobias A, et al. Case-crossover analysis of air pollution health  
4 580 effects: a systematic review of methodology and application. *Environ Health Perspect*  
5 581 2010;118(8):1173-82. doi: 10.1289/ehp.0901485 [published Online First: 2010/04/02]  
6 582 35. DeFlorio-Barker S, Crooks J, Reyes J, et al. Cardiopulmonary Effects of Fine Particulate Matter  
7 583 Exposure among Older Adults, during Wildfire and Non-Wildfire Periods, in the United States  
8 584 2008-2010. *Environ Health Perspect* 2019;127(3):37006. doi: 10.1289/ehp3860 [published  
9 585 Online First: 2019/03/16]  
10 586 36. Hildebrandt M, Bender R, Gehrman U, et al. Calculating confidence intervals for impact numbers.  
11 587 *BMC Med Res Methodol* 2006;6:32. doi: 10.1186/1471-2288-6-32 [published Online First:  
12 588 2006/07/14]  
13 589 37. A language and environment for statistical computing. R Foundation for Statistical Computing  
14 590 [program]. Vienna, Austria, 2019.  
15 591 38. Peng RD, Bell ML, Geyh AS, et al. Emergency admissions for cardiovascular and respiratory diseases  
16 592 and the chemical composition of fine particle air pollution. *Environ Health Perspect*  
17 593 2009;117(6):957-63. doi: 10.1289/ehp.0800185 [published Online First: 2009/07/11]  
18 594 39. Peng RD, Chang HH, Bell ML, et al. Coarse particulate matter air pollution and hospital admissions for  
19 595 cardiovascular and respiratory diseases among Medicare patients. *Jama* 2008;299(18):2172-9.  
20 596 doi: 10.1001/jama.299.18.2172 [published Online First: 2008/05/15]  
21 597 40. Powell H, Krall JR, Wang Y, et al. Ambient Coarse Particulate Matter and Hospital Admissions in the  
22 598 Medicare Cohort Air Pollution Study, 1999-2010. *Environ Health Perspect* 2015;123(11):1152-8.  
23 599 doi: 10.1289/ehp.1408720 [published Online First: 2015/04/15]  
24 600 41. Zanobetti A, Dominici F, Wang Y, et al. A national case-crossover analysis of the short-term effect of  
25 601 PM<sub>2.5</sub> on hospitalizations and mortality in subjects with diabetes and neurological disorders.  
26 602 *Environmental health : a global access science source* 2014;13(1):38. doi: 10.1186/1476-069x-  
27 603 13-38 [published Online First: 2014/06/03]  
28 604 42. Wellenius GA, Bateson TF, Mittleman MA, et al. Particulate air pollution and the rate of  
29 605 hospitalization for congestive heart failure among medicare beneficiaries in Pittsburgh,  
30 606 Pennsylvania. *Am J Epidemiol* 2005;161(11):1030-6. doi: 10.1093/aje/kwi135 [published Online  
31 607 First: 2005/05/20]  
32 608 43. Huynh QL, Blizzard CL, Marwick TH, et al. Association of ambient particulate matter with heart  
33 609 failure incidence and all-cause readmissions in Tasmania: an observational study. *BMJ Open*  
34 610 2018;8(5):e021798. doi: 10.1136/bmjopen-2018-021798  
35 611 44. von Klot S, Peters A, Aalto P, et al. Ambient air pollution is associated with increased risk of hospital  
36 612 cardiac readmissions of myocardial infarction survivors in five European cities. *Circulation*  
37 613 2005;112(20):3073-79. doi: 10.1161/CIRCULATIONAHA.105.548743  
38 614 45. Liu MH, Chan MJ, Hsu CW, et al. Association of uremic pruritus in hemodialysis patients with the  
39 615 number of days of high mean 24-hour particulate matter with a diameter of <2.5 µm.  
40 616 *Therapeutics and clinical risk management* 2017;13:255-62. doi: 10.2147/tcrm.s129133  
41 617 [published Online First: 2017/03/07]  
42 618 46. Chiu PF, Chang CH, Wu CL, et al. High particulate matter 2.5 levels and ambient temperature are  
43 619 associated with acute lung edema in patients with nondialysis Stage 5 chronic kidney disease.  
44 620 *Nephrology, dialysis, transplantation : official publication of the European Dialysis and*  
45 621 *Transplant Association - European Renal Association* 2018 doi: 10.1093/ndt/gfy144 [published  
46 622 Online First: 2018/06/26]  
47 623 47. Huang WH, Yen TH, Chan MJ, et al. Impact of environmental particulate matter and peritoneal  
48 624 dialysis-related infection in patients undergoing peritoneal dialysis. *Medicine* 2014;93(25):e149.  
49 625 doi: 10.1097/md.000000000000149 [published Online First: 2014/12/02]

- 1  
2  
3 626 48. Mathew AT, Rosen L, Pekmezaris R, et al. Potentially Avoidable Readmissions in United States  
4 627 Hemodialysis Patients. *Kidney Int Rep* 2017;3(2):343-55. doi: 10.1016/j.ekir.2017.10.014  
5 628 49. Wei YG, Wang Y, Di Q, et al. Short term exposure to fine particulate matter and hospital admission  
6 629 risks and costs in the Medicare population: time stratified, case crossover study. *BMJ-British*  
7 630 *Medical Journal* 2019;367:13. doi: 10.1136/bmj.l6258  
8 631 50. Frieden TR. A framework for public health action: the health impact pyramid. *American journal of*  
9 632 *public health* 2010;100(4):590-5. doi: 10.2105/ajph.2009.185652 [published Online First:  
10 633 2010/02/20]  
11  
12  
13 634  
14  
15  
16  
17  
18  
19  
20  
21  
22  
23  
24  
25  
26  
27  
28  
29  
30  
31  
32  
33  
34  
35  
36  
37  
38  
39  
40  
41  
42  
43  
44  
45  
46  
47  
48  
49  
50  
51  
52  
53  
54  
55  
56  
57  
58  
59  
60

For peer review only

1  
2  
3 635 **Figure 1.** The relative risk (RR, 95%CI) for an all-cause early and late-readmission following all-  
4  
5 636 cause and cause-specific discharges. Discharges are color coded: all-cause discharges are  
6  
7 637 indicated in black, cardiovascular causes in orange, and respiratory causes in blue. Early-  
8  
9 638 readmissions are indicated with filled in circles, late-readmissions with open circles. RR is  
10  
11 639 expressed per 10  $\mu\text{g}/\text{m}^3$  increase in  $\text{PM}_{2.5}$ .  
12  
13

14 640  
15  
16 641 **Figure 2.** The relative risk (RR, 95%CI) of cause-specific early and late-readmission following  
17  
18 642 all-cause discharge. Readmission causes are color coded: all-cause readmissions are indicated  
19  
20 643 in black, cardiovascular causes in orange, and respiratory causes in blue. RR is expressed per  
21  
22 644 10  $\mu\text{g}/\text{m}^3$  increase in  $\text{PM}_{2.5}$ .  
23  
24

25 645  
26 646 **Figure 3.** Mean proportion (95%CI) of all-cause and cause-specific hospital admissions, early  
27  
28 647 readmissions (1-7d), and late readmissions (8-30d) with respect to  $\text{PM}_{2.5}$  ( $\mu\text{g}/\text{m}^3$ ). Hash marks  
29  
30 648 above the x-axis represent the density of daily county  $\text{PM}_{2.5}$ . The 95% CI under 15.9  $\mu\text{g}/\text{m}^3$  is  
31  
32 649 shaded darker to indicate where 90 percent of the data falls.  
33  
34

35 650  
36  
37 651 **Figure 4.** Average daily county  $\text{PM}_{2.5}$  ( $\mu\text{g}/\text{m}^3$ ) between 2008 and 2014 (A) and the attributable  
38  
39 652 fraction for early-readmission following an all-cause discharge based on the average  $\text{PM}_{2.5}$  (B)  
40  
41 653 for the 530 counties included in the study.  
42  
43

44 654  
45  
46  
47  
48  
49  
50  
51  
52  
53  
54  
55  
56  
57  
58  
59  
60

655 **Table 1.** Baseline Demographic Characteristics of the Study Population Between 2008 and  
 656 2014 by Hospital Admission Category.

| Characteristic                    | No. (%)                  |                               |                            |
|-----------------------------------|--------------------------|-------------------------------|----------------------------|
|                                   | All-cause<br>N = 351,294 | Cardiovascular<br>n = 262,385 | Respiratory<br>n = 247,829 |
| Age (yr), mean (SD)               | 64.69 (14.70)            | 65.58 (14.53)                 | 65.61 (14.48)              |
| Male sex (%)                      | 190,716 (54.3)           | 140,206 (53.4)                | 132,288 (53.4)             |
| Race                              |                          |                               |                            |
| White                             | 209,921 (59.8)           | 155,405 (59.2)                | 147,204 (59.4)             |
| Black                             | 122,943 (35.0)           | 93,325 (35.6)                 | 87,831 (35.4)              |
| Other                             | 18,430 (5.2)             | 13,655 (5.2)                  | 12,794 (5.2)               |
| Smoking status at initiation (no) | 330,837 (94.2)           | 246,634 (94.0)                | 232,396 (93.8)             |

657

658 **Table 2.** Hospital Admission Characteristics Among the Study Population Between 2008 and  
659 2014.

| Outcome                       | Number of Events (Number of Unique Patients) |                   |                   |
|-------------------------------|----------------------------------------------|-------------------|-------------------|
|                               | All-cause                                    | Cardiovascular    | Respiratory       |
| Admissions                    | 1,801,966 (351,294)                          | 832,255 (262,385) | 766,447 (247,829) |
| Discharged alive              | 1,493,795 (312,521)                          | 685,680 (229,780) | 637,250 (217,221) |
| Early-readmission (1-7d)      | 176,822 (91,508)                             | 83,193 (52,374)   | 78,392 (49,343)   |
| Late-readmission (8-30d)      | 317,948 (130, 454)                           | 150,080 (80,851)  | 141,656 (76,444)  |
| Length of stay, d             |                                              |                   |                   |
| Mean (SD)                     | 6.98 (10.68)                                 | 7.05 (10.34)      | 7.07 (10.38)      |
| Median (IQR)                  | 4 (2-7)                                      | 4 (2-8)           | 4 (2-8)           |
| Hospital visits in prior year |                                              |                   |                   |
| 3+ visits                     | 637,503 (123,949)                            | 307,891 (93,399)  | 292,803 (89,905)  |
| Mean (SD)                     | 2.97 (3.80)                                  | 3.14 (3.95)       | 3.21 (3.89)       |
| Median (IQR)                  | 2 (1-4)                                      | 2 (1-4)           | 2 (1-4)           |

660

661

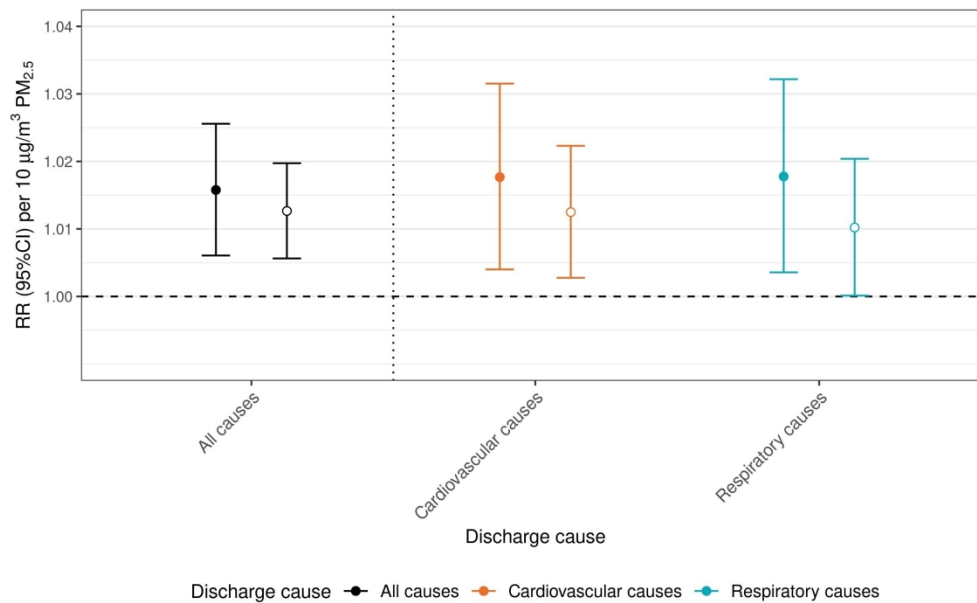

The relative risk (RR, 95%CI) for an all-cause early and late-readmission following all-cause and cause-specific discharges. Discharges are color coded: all-cause discharges are indicated in black, cardiovascular causes in orange, and respiratory causes in blue. Early-readmissions are indicated with filled in circles, late-readmissions with open circles. RR is expressed per 10 µg/m<sup>3</sup> increase in PM<sub>2.5</sub>.

203x127mm (300 x 300 DPI)

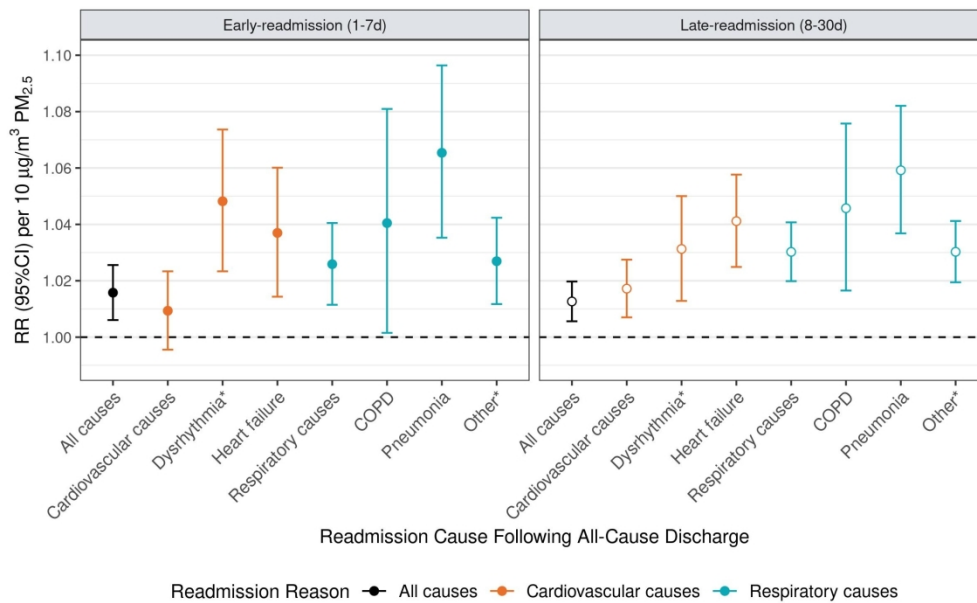

The relative risk (RR, 95%CI) of cause-specific early and late-readmission following all-cause discharge. Readmission causes are color coded: all-cause readmissions are indicated in black, cardiovascular causes in orange, and respiratory causes in blue. RR is expressed per 10 µg/m<sup>3</sup> increase in PM<sub>2.5</sub>.

203x127mm (300 x 300 DPI)

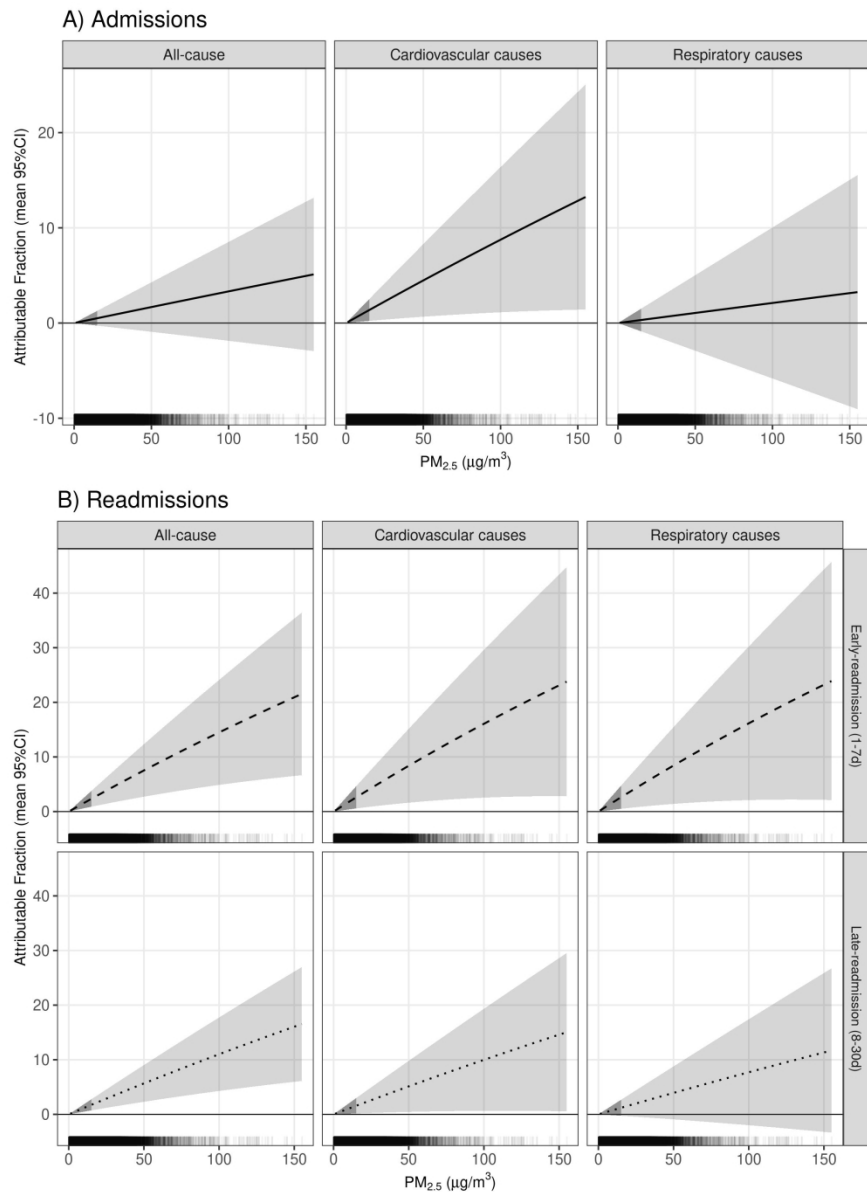

45 Mean proportion (95%CI) of all-cause and cause-specific hospital admissions, early readmissions (1-7d),  
 46 and late readmissions (8-30d) with respect to PM<sub>2.5</sub> (µg/m<sup>3</sup>). Hash marks above the x-axis represent the  
 47 density of daily county PM<sub>2.5</sub>. The 95% CI under 15.9 µg/m<sup>3</sup> is shaded darker to indicate where 90 percent  
 48 of the data falls.

49 203x279mm (300 x 300 DPI)



A) Daily county average PM<sub>2.5</sub> (7yr average)

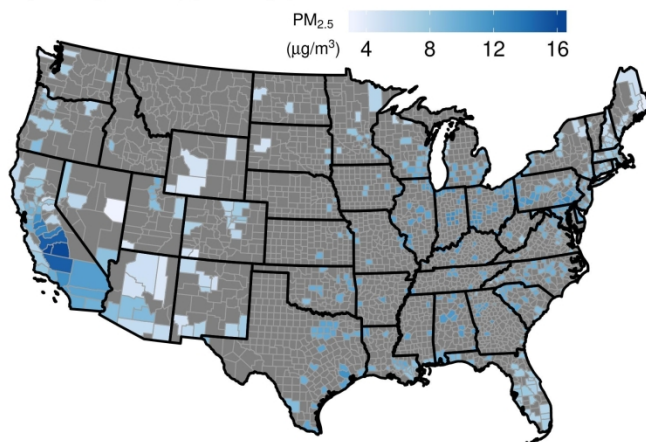

B) Exposure attributable fraction for early-readmission following an all-cause discharge

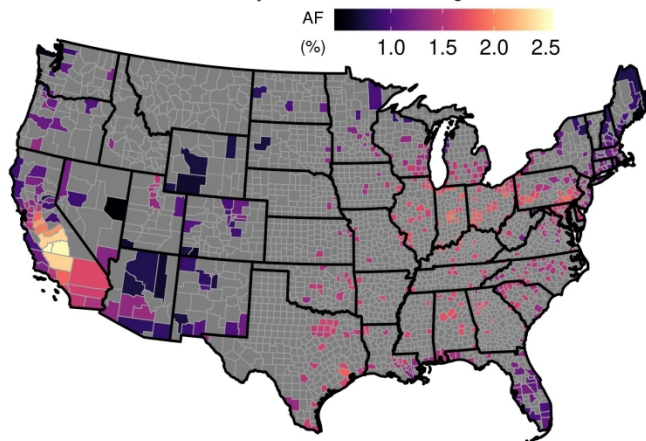

Average daily county PM<sub>2.5</sub> (µg/m<sup>3</sup>) between 2008 and 2014 (A) and the attributable fraction for early-readmission following an all-cause discharge based on the average PM<sub>2.5</sub> (B) for the 530 counties included in the study.

203x279mm (300 x 300 DPI)

1  
2  
3  
4  
5  
6  
7  
8  
9  
10  
11  
12  
13  
14  
15  
16  
17  
18  
19  
20  
21  
22  
23  
24  
25  
26  
27  
28  
29  
30  
31  
32  
33  
34  
35  
36  
37  
38  
39  
40  
41  
42  
43  
44  
45  
46  
47  
48  
49  
50  
51  
52  
53  
54  
55  
56  
57  
58  
59  
60

1 **Supplemental Materials**

3 **Table S1.** Summary statistics of PM<sub>2.5</sub> and meteorological variables across 530 counties.

| Variable                               | Mean ± SD     | Minimum | Maximum |
|----------------------------------------|---------------|---------|---------|
| PM <sub>2.5</sub> (µg/m <sup>3</sup> ) | 9.29 ± 5.39   | 0.05    | 155.16  |
| Temperature (°F)                       | 56.37 ± 18.50 | -37.30  | 104.74  |
| Relative humidity (%)                  | 65.24 ± 16.24 | 0       | 100     |

4

**Table S2.** The relative risk (RR, 95%CI) for an all-cause, cardiovascular, and respiratory related early and late-readmission following all-cause and cause-specific discharges. RR is expressed per 10  $\mu\text{g}/\text{m}^3$  increase in  $\text{PM}_{2.5}$ . Models presented include the main model presented in the paper (model 1) where  $\text{PM}_{2.5}$  is considered as a linear variable and a model that considers  $\text{PM}_{2.5}$  as a non-linear variable (model 2).

| Readmission model        | Discharge cause    | Readmission cause           | Model 1<br>PM linear<br>RR (95%CI) | Model 2<br>PM non-linear<br>RR (95%CI) |
|--------------------------|--------------------|-----------------------------|------------------------------------|----------------------------------------|
| Early-readmission (1-7d) | All Causes         | All Causes                  | 1.016 (1.006, 1.026)               | 1.089 (1.016, 1.168)                   |
| Early-readmission (1-7d) | All Causes         | All Cardiovascular          | 1.009 (0.996, 1.023)               | 0.984 (0.892, 1.085)                   |
| Early-readmission (1-7d) | All Causes         | Dysrhythmia*                | 1.048 (1.023, 1.074)               | 0.898 (0.754, 1.070)                   |
| Early-readmission (1-7d) | All Causes         | Heart failure               | 1.037 (1.014, 1.060)               | 1.065 (0.906, 1.252)                   |
| Early-readmission (1-7d) | All Causes         | Hypertension                | 1.007 (0.990, 1.025)               | 1.011 (0.895, 1.141)                   |
| Early-readmission (1-7d) | All Causes         | Ischemic heart disease      | 0.970 (0.929, 1.012)               | 0.910 (0.678, 1.222)                   |
| Early-readmission (1-7d) | All Causes         | Myocardial infarction       | 0.955 (0.906, 1.007)               | 0.940 (0.651, 1.358)                   |
| Early-readmission (1-7d) | All Causes         | Peripheral arterial disease | 0.900 (0.748, 1.083)               | 0.389 (0.121, 1.254)                   |
| Early-readmission (1-7d) | All Causes         | All Respiratory             | 1.026 (1.011, 1.040)               | 1.082 (0.977, 1.199)                   |
| Early-readmission (1-7d) | All Causes         | Asthma                      | 1.102 (0.992, 1.226)               | 0.464 (0.240, 0.900)                   |
| Early-readmission (1-7d) | All Causes         | COPD                        | 1.040 (1.002, 1.081)               | 1.021 (0.763, 1.366)                   |
| Early-readmission (1-7d) | All Causes         | Other*                      | 1.027 (1.012, 1.042)               | 1.093 (0.981, 1.218)                   |
| Early-readmission (1-7d) | All Causes         | Pneumonia                   | 1.065 (1.035, 1.096)               | 1.263 (1.012, 1.576)                   |
| Early-readmission (1-7d) | All Causes         | Pulmonary embolism          | 1.047 (0.930, 1.179)               | 0.911 (0.371, 2.233)                   |
| Early-readmission (1-7d) | All Cardiovascular | All Causes                  | 1.018 (1.004, 1.032)               | 1.034 (0.933, 1.145)                   |
| Early-readmission (1-7d) | All Cardiovascular | All Cardiovascular          | 1.006 (0.989, 1.024)               | 0.938 (0.823, 1.070)                   |
| Early-readmission (1-7d) | All Cardiovascular | Dysrhythmia*                | 1.043 (1.012, 1.076)               | 1.006 (0.793, 1.278)                   |
| Early-readmission (1-7d) | All Cardiovascular | Heart failure               | 1.027 (0.999, 1.056)               | 0.994 (0.810, 1.221)                   |
| Early-readmission (1-7d) | All Cardiovascular | Hypertension                | 1.006 (0.985, 1.028)               | 0.911 (0.776, 1.069)                   |
| Early-readmission (1-7d) | All Cardiovascular | Ischemic heart disease      | 1.014 (0.963, 1.069)               | 0.888 (0.603, 1.309)                   |
| Early-readmission (1-7d) | All Cardiovascular | Myocardial infarction       | 0.987 (0.924, 1.054)               | 0.901 (0.557, 1.459)                   |
| Early-readmission (1-7d) | All Cardiovascular | Peripheral arterial disease | 0.924 (0.693, 1.230)               | 0.195 (0.044, 0.875)                   |

|    |                          |                    |                             |                      |                      |
|----|--------------------------|--------------------|-----------------------------|----------------------|----------------------|
| 1  | Early-readmission (1-7d) | All Cardiovascular | All Respiratory             | 1.025 (1.006, 1.045) | 1.015 (0.882, 1.169) |
| 2  | Early-readmission (1-7d) | All Cardiovascular | Asthma                      | 1.086 (0.948, 1.243) | 0.335 (0.144, 0.781) |
| 3  | Early-readmission (1-7d) | All Cardiovascular | COPD                        | 1.035 (0.985, 1.087) | 0.877 (0.604, 1.275) |
| 4  | Early-readmission (1-7d) | All Cardiovascular | Other*                      | 1.025 (1.005, 1.045) | 1.067 (0.919, 1.238) |
| 5  | Early-readmission (1-7d) | All Cardiovascular | Pneumonia                   | 1.075 (1.035, 1.117) | 1.124 (0.831, 1.521) |
| 6  | Early-readmission (1-7d) | All Cardiovascular | Pulmonary embolism          | 1.134 (0.986, 1.303) | 1.879 (0.544, 6.491) |
| 7  | Early-readmission (1-7d) | All Respiratory    | All Causes                  | 1.018 (1.004, 1.032) | 1.041 (0.939, 1.154) |
| 8  | Early-readmission (1-7d) | All Respiratory    | All Cardiovascular          | 1.007 (0.988, 1.026) | 1.011 (0.880, 1.161) |
| 9  | Early-readmission (1-7d) | All Respiratory    | Dysrhythmia*                | 1.045 (1.011, 1.080) | 0.936 (0.731, 1.198) |
| 10 | Early-readmission (1-7d) | All Respiratory    | Heart failure               | 1.017 (0.988, 1.047) | 0.989 (0.802, 1.220) |
| 11 | Early-readmission (1-7d) | All Respiratory    | Hypertension                | 1.014 (0.990, 1.038) | 1.056 (0.885, 1.260) |
| 12 | Early-readmission (1-7d) | All Respiratory    | Ischemic heart disease      | 0.971 (0.918, 1.028) | 0.783 (0.534, 1.149) |
| 13 | Early-readmission (1-7d) | All Respiratory    | Myocardial infarction       | 0.938 (0.872, 1.009) | 0.682 (0.422, 1.102) |
| 14 | Early-readmission (1-7d) | All Respiratory    | Peripheral arterial disease | 0.857 (0.603, 1.219) | 0.189 (0.035, 1.004) |
| 15 | Early-readmission (1-7d) | All Respiratory    | All Respiratory             | 1.025 (1.006, 1.044) | 1.087 (0.947, 1.248) |
| 16 | Early-readmission (1-7d) | All Respiratory    | Asthma                      | 1.074 (0.938, 1.230) | 0.407 (0.180, 0.920) |
| 17 | Early-readmission (1-7d) | All Respiratory    | COPD                        | 1.041 (0.993, 1.092) | 0.856 (0.600, 1.223) |
| 18 | Early-readmission (1-7d) | All Respiratory    | Other*                      | 1.028 (1.008, 1.048) | 1.114 (0.963, 1.289) |
| 19 | Early-readmission (1-7d) | All Respiratory    | Pneumonia                   | 1.049 (1.011, 1.089) | 1.185 (0.890, 1.578) |
| 20 | Early-readmission (1-7d) | All Respiratory    | Pulmonary embolism          | 1.075 (0.913, 1.265) | 0.921 (0.265, 3.202) |
| 21 | Late-readmission (8-30d) | All Causes         | All Causes                  | 1.013 (1.006, 1.020) | 1.024 (0.974, 1.077) |
| 22 | Late-readmission (8-30d) | All Causes         | All Cardiovascular          | 1.017 (1.007, 1.027) | 1.071 (0.995, 1.153) |
| 23 | Late-readmission (8-30d) | All Causes         | Dysrhythmia*                | 1.031 (1.013, 1.050) | 1.103 (0.961, 1.266) |
| 24 | Late-readmission (8-30d) | All Causes         | Heart failure               | 1.041 (1.025, 1.058) | 1.027 (0.915, 1.154) |
| 25 | Late-readmission (8-30d) | All Causes         | Hypertension                | 1.010 (0.998, 1.023) | 1.036 (0.947, 1.135) |
| 26 | Late-readmission (8-30d) | All Causes         | Ischemic heart disease      | 1.008 (0.975, 1.042) | 0.858 (0.676, 1.089) |
| 27 | Late-readmission (8-30d) | All Causes         | Myocardial infarction       | 0.974 (0.933, 1.017) | 0.722 (0.538, 0.968) |
| 28 | Late-readmission (8-30d) | All Causes         | Peripheral arterial disease | 1.003 (0.873, 1.153) | 1.367 (0.511, 3.653) |
| 29 | Late-readmission (8-30d) | All Causes         | All Respiratory             | 1.030 (1.020, 1.041) | 1.083 (1.004, 1.169) |
| 30 | Late-readmission (8-30d) | All Causes         | Asthma                      | 1.071 (0.998, 1.150) | 1.327 (0.739, 2.382) |
| 31 | Late-readmission (8-30d) | All Causes         | COPD                        | 1.046 (1.017, 1.076) | 1.001 (0.813, 1.232) |
| 32 | Late-readmission (8-30d) | All Causes         | Other*                      | 1.030 (1.019, 1.041) | 1.113 (1.028, 1.206) |

|                          |                    |                             |                      |                       |
|--------------------------|--------------------|-----------------------------|----------------------|-----------------------|
| Late-readmission (8-30d) | All Causes         | Pneumonia                   | 1.059 (1.037, 1.082) | 1.104 (0.940, 1.297)  |
| Late-readmission (8-30d) | All Causes         | Pulmonary embolism          | 1.063 (0.959, 1.178) | 1.774 (0.742, 4.240)  |
| Late-readmission (8-30d) | All Cardiovascular | All Causes                  | 1.012 (1.003, 1.022) | 1.030 (0.956, 1.109)  |
| Late-readmission (8-30d) | All Cardiovascular | All Cardiovascular          | 1.016 (1.003, 1.029) | 1.048 (0.950, 1.157)  |
| Late-readmission (8-30d) | All Cardiovascular | Dysrhythmia*                | 1.035 (1.012, 1.058) | 1.058 (0.884, 1.266)  |
| Late-readmission (8-30d) | All Cardiovascular | Heart failure               | 1.035 (1.015, 1.055) | 1.055 (0.907, 1.227)  |
| Late-readmission (8-30d) | All Cardiovascular | Hypertension                | 1.007 (0.991, 1.023) | 1.002 (0.889, 1.129)  |
| Late-readmission (8-30d) | All Cardiovascular | Ischemic heart disease      | 0.977 (0.936, 1.020) | 0.740 (0.542, 1.010)  |
| Late-readmission (8-30d) | All Cardiovascular | Myocardial infarction       | 0.946 (0.894, 1.002) | 0.593 (0.405, 0.868)  |
| Late-readmission (8-30d) | All Cardiovascular | Peripheral arterial disease | 1.013 (0.815, 1.258) | 1.084 (0.257, 4.566)  |
| Late-readmission (8-30d) | All Cardiovascular | All Respiratory             | 1.028 (1.015, 1.042) | 1.086 (0.978, 1.206)  |
| Late-readmission (8-30d) | All Cardiovascular | Asthma                      | 1.057 (0.963, 1.160) | 1.424 (0.654, 3.097)  |
| Late-readmission (8-30d) | All Cardiovascular | COPD                        | 1.047 (1.011, 1.084) | 0.840 (0.645, 1.094)  |
| Late-readmission (8-30d) | All Cardiovascular | Other*                      | 1.028 (1.014, 1.042) | 1.130 (1.012, 1.262)  |
| Late-readmission (8-30d) | All Cardiovascular | Pneumonia                   | 1.052 (1.023, 1.082) | 1.203 (0.963, 1.504)  |
| Late-readmission (8-30d) | All Cardiovascular | Pulmonary embolism          | 1.036 (0.909, 1.181) | 1.251 (0.389, 4.020)  |
| Late-readmission (8-30d) | All Respiratory    | All Causes                  | 1.010 (1.000, 1.020) | 1.039 (0.963, 1.120)  |
| Late-readmission (8-30d) | All Respiratory    | All Cardiovascular          | 1.020 (1.006, 1.034) | 1.076 (0.970, 1.194)  |
| Late-readmission (8-30d) | All Respiratory    | Dysrhythmia*                | 1.037 (1.012, 1.062) | 1.053 (0.869, 1.277)  |
| Late-readmission (8-30d) | All Respiratory    | Heart failure               | 1.034 (1.013, 1.055) | 1.130 (0.968, 1.319)  |
| Late-readmission (8-30d) | All Respiratory    | Hypertension                | 1.013 (0.996, 1.030) | 1.040 (0.914, 1.184)  |
| Late-readmission (8-30d) | All Respiratory    | Ischemic heart disease      | 0.975 (0.932, 1.002) | 0.759 (0.553, 1.040)  |
| Late-readmission (8-30d) | All Respiratory    | Myocardial infarction       | 0.948 (0.893, 1.006) | 0.710 (0.472, 1.069)  |
| Late-readmission (8-30d) | All Respiratory    | Peripheral arterial disease | 1.102 (0.894, 1.359) | 1.895 (0.351, 10.226) |
| Late-readmission (8-30d) | All Respiratory    | All Respiratory             | 1.019 (1.005, 1.032) | 1.078 (0.974, 1.193)  |
| Late-readmission (8-30d) | All Respiratory    | Asthma                      | 0.996 (0.905, 1.095) | 1.200 (0.579, 2.489)  |
| Late-readmission (8-30d) | All Respiratory    | COPD                        | 1.026 (0.991, 1.063) | 0.887 (0.691, 1.138)  |
| Late-readmission (8-30d) | All Respiratory    | Other*                      | 1.019 (1.005, 1.033) | 1.119 (1.005, 1.246)  |
| Late-readmission (8-30d) | All Respiratory    | Pneumonia                   | 1.062 (1.033, 1.092) | 1.178 (0.947, 1.465)  |
| Late-readmission (8-30d) | All Respiratory    | Pulmonary embolism          | 1.070 (0.915, 1.252) | 1.848 (0.599, 5.701)  |

**Table S3.** Relative risk (RR ± 95% CI) of all-cause and cause-specific daily county admission rates associated with a 10 µg/m<sup>3</sup> increase in PM<sub>2.5</sub> for exposure lags 0-14 days. Models presented include the main model presented in the paper (model 1) where PM<sub>2.5</sub> is considered as a linear variable and a model that considers PM<sub>2.5</sub> as a non-linear variable (model 2). Additionally, the main model was stratified on the median of percent of individuals below poverty with respect to county (12.5% below poverty), with model 3 representing the model with counties with high % below poverty and model 4 representing counties with low % below poverty.

|                               |     | Model 1, PM linear   | Model 2, PM non-linear | Model 3, PM linear high % poverty | Model 4, PM linear low % poverty |
|-------------------------------|-----|----------------------|------------------------|-----------------------------------|----------------------------------|
| Endpoint                      | Lag | RR (95%CI)           | RR (95%CI)             | RR (95%CI)                        | RR (95%CI)                       |
| All-cause                     | 0   | 1.003 (0.998, 1.009) | 0.998 (1.009, 0.996)   | 1.009 (0.996, 0.978)              | 0.996 (0.978, 1.015)             |
| All-cause                     | 1   | 0.997 (0.99, 1.003)  | 0.99 (1.003, 0.988)    | 1.003 (0.988, 0.968)              | 0.988 (0.968, 1.008)             |
| All-cause                     | 2   | 0.999 (0.992, 1.005) | 0.992 (1.005, 0.998)   | 1.005 (0.998, 0.978)              | 0.998 (0.978, 1.018)             |
| All-cause                     | 3   | 0.996 (0.99, 1.002)  | 0.99 (1.002, 1.011)    | 1.002 (1.011, 0.991)              | 1.011 (0.991, 1.032)             |
| All-cause                     | 4   | 1.002 (0.996, 1.008) | 0.996 (1.008, 1.006)   | 1.008 (1.006, 0.986)              | 1.006 (0.986, 1.027)             |
| All-cause                     | 5   | 1.001 (0.995, 1.007) | 0.995 (1.007, 0.977)   | 1.007 (0.977, 0.957)              | 0.977 (0.957, 0.997)             |
| All-cause                     | 6   | 1.001 (0.995, 1.008) | 0.995 (1.008, 0.988)   | 1.008 (0.988, 0.968)              | 0.988 (0.968, 1.009)             |
| All-cause                     | 7   | 1 (0.993, 1.006)     | 0.993 (1.006, 0.982)   | 1.006 (0.982, 0.961)              | 0.982 (0.961, 1.003)             |
| All-cause                     | 8   | 1.004 (0.997, 1.01)  | 0.997 (1.01, 1.001)    | 1.01 (1.001, 0.981)               | 1.001 (0.981, 1.022)             |
| All-cause                     | 9   | 1.004 (0.998, 1.01)  | 0.998 (1.01, 0.985)    | 1.01 (0.985, 0.965)               | 0.985 (0.965, 1.006)             |
| All-cause                     | 10  | 0.999 (0.993, 1.005) | 0.993 (1.005, 1.02)    | 1.005 (1.02, 1)                   | 1.02 (1, 1.042)                  |
| All-cause                     | 11  | 0.996 (0.989, 1.002) | 0.989 (1.002, 0.998)   | 1.002 (0.998, 0.978)              | 0.998 (0.978, 1.019)             |
| All-cause                     | 12  | 1.002 (0.996, 1.009) | 0.996 (1.009, 1.006)   | 1.009 (1.006, 0.986)              | 1.006 (0.986, 1.028)             |
| All-cause                     | 13  | 0.995 (0.989, 1.001) | 0.989 (1.001, 0.979)   | 1.001 (0.979, 0.959)              | 0.979 (0.959, 0.999)             |
| All-cause                     | 14  | 1 (0.994, 1.005)     | 0.994 (1.005, 0.987)   | 1.005 (0.987, 0.968)              | 0.987 (0.968, 1.006)             |
| Cardiovascular related causes | 0   | 1.009 (1.002, 1.017) | 1.002 (1.017, 0.994)   | 1.017 (0.994, 0.967)              | 0.994 (0.967, 1.022)             |
| Cardiovascular related causes | 1   | 0.995 (0.986, 1.004) | 0.986 (1.004, 0.978)   | 1.004 (0.978, 0.949)              | 0.978 (0.949, 1.007)             |

|                               |    |                      |                      |                      |                      |
|-------------------------------|----|----------------------|----------------------|----------------------|----------------------|
| Cardiovascular related causes | 2  | 0.998 (0.988, 1.007) | 0.988 (1.007, 0.997) | 1.007 (0.997, 0.968) | 0.997 (0.968, 1.028) |
| Cardiovascular related causes | 3  | 0.993 (0.984, 1.002) | 0.984 (1.002, 1)     | 1.002 (1, 0.97)      | 1 (0.97, 1.03)       |
| Cardiovascular related causes | 4  | 1.003 (0.994, 1.012) | 0.994 (1.012, 1.029) | 1.012 (1.029, 0.999) | 1.029 (0.999, 1.06)  |
| Cardiovascular related causes | 5  | 1.004 (0.994, 1.013) | 0.994 (1.013, 0.976) | 1.013 (0.976, 0.947) | 0.976 (0.947, 1.006) |
| Cardiovascular related causes | 6  | 0.999 (0.99, 1.008)  | 0.99 (1.008, 0.991)  | 1.008 (0.991, 0.962) | 0.991 (0.962, 1.022) |
| Cardiovascular related causes | 7  | 1.005 (0.995, 1.014) | 0.995 (1.014, 0.979) | 1.014 (0.979, 0.949) | 0.979 (0.949, 1.01)  |
| Cardiovascular related causes | 8  | 1.002 (0.993, 1.011) | 0.993 (1.011, 0.999) | 1.011 (0.999, 0.969) | 0.999 (0.969, 1.03)  |
| Cardiovascular related causes | 9  | 1.009 (1, 1.018)     | 1 (1.018, 0.992)     | 1.018 (0.992, 0.963) | 0.992 (0.963, 1.023) |
| Cardiovascular related causes | 10 | 0.992 (0.983, 1.001) | 0.983 (1.001, 0.996) | 1.001 (0.996, 0.966) | 0.996 (0.966, 1.026) |
| Cardiovascular related causes | 11 | 0.999 (0.99, 1.008)  | 0.99 (1.008, 1.017)  | 1.008 (1.017, 0.987) | 1.017 (0.987, 1.048) |
| Cardiovascular related causes | 12 | 0.999 (0.99, 1.008)  | 0.99 (1.008, 1.004)  | 1.008 (1.004, 0.974) | 1.004 (0.974, 1.035) |
| Cardiovascular related causes | 13 | 0.996 (0.987, 1.005) | 0.987 (1.005, 0.969) | 1.005 (0.969, 0.94)  | 0.969 (0.94, 0.999)  |
| Cardiovascular related causes | 14 | 1.002 (0.994, 1.009) | 0.994 (1.009, 1.007) | 1.009 (1.007, 0.978) | 1.007 (0.978, 1.036) |
| Respiratory related causes    | 0  | 1.002 (0.994, 1.01)  | 0.994 (1.01, 0.998)  | 1.01 (0.998, 0.97)   | 0.998 (0.97, 1.027)  |
| Respiratory related causes    | 1  | 0.998 (0.989, 1.008) | 0.989 (1.008, 0.977) | 1.008 (0.977, 0.948) | 0.977 (0.948, 1.008) |
| Respiratory related causes    | 2  | 0.995 (0.985, 1.004) | 0.985 (1.004, 1.007) | 1.004 (1.007, 0.976) | 1.007 (0.976, 1.039) |
| Respiratory related causes    | 3  | 0.995 (0.985, 1.004) | 0.985 (1.004, 1.006) | 1.004 (1.006, 0.975) | 1.006 (0.975, 1.038) |
| Respiratory related causes    | 4  | 0.999 (0.989, 1.008) | 0.989 (1.008, 0.997) | 1.008 (0.997, 0.967) | 0.997 (0.967, 1.029) |

1  
2  
3  
4  
5  
6  
7  
8  
9  
10  
11  
12  
13  
14  
15  
16  
17  
18  
19  
20  
21  
22  
23  
24  
25  
26  
27  
28  
29  
30  
31  
32  
33  
34  
35  
36  
37  
38  
39  
40  
41  
42  
43  
44  
45  
46  
47

|                            |    |                      |                      |                      |                      |
|----------------------------|----|----------------------|----------------------|----------------------|----------------------|
| Respiratory related causes | 5  | 1.009 (1, 1.019)     | 1 (1.019, 0.993)     | 1.019 (0.993, 0.962) | 0.993 (0.962, 1.024) |
| Respiratory related causes | 6  | 0.999 (0.99, 1.009)  | 0.99 (1.009, 0.974)  | 1.009 (0.974, 0.944) | 0.974 (0.944, 1.005) |
| Respiratory related causes | 7  | 0.999 (0.989, 1.009) | 0.989 (1.009, 0.984) | 1.009 (0.984, 0.952) | 0.984 (0.952, 1.017) |
| Respiratory related causes | 8  | 1.005 (0.996, 1.015) | 0.996 (1.015, 1.011) | 1.015 (1.011, 0.98)  | 1.011 (0.98, 1.043)  |
| Respiratory related causes | 9  | 1.008 (0.999, 1.018) | 0.999 (1.018, 0.979) | 1.018 (0.979, 0.948) | 0.979 (0.948, 1.01)  |
| Respiratory related causes | 10 | 0.995 (0.985, 1.004) | 0.985 (1.004, 0.994) | 1.004 (0.994, 0.963) | 0.994 (0.963, 1.026) |
| Respiratory related causes | 11 | 0.997 (0.988, 1.007) | 0.988 (1.007, 1.013) | 1.007 (1.013, 0.981) | 1.013 (0.981, 1.046) |
| Respiratory related causes | 12 | 1.002 (0.992, 1.011) | 0.992 (1.011, 0.998) | 1.011 (0.998, 0.967) | 0.998 (0.967, 1.03)  |
| Respiratory related causes | 13 | 0.997 (0.987, 1.006) | 0.987 (1.006, 0.979) | 1.006 (0.979, 0.948) | 0.979 (0.948, 1.011) |
| Respiratory related causes | 14 | 1.001 (0.993, 1.009) | 0.993 (1.009, 0.995) | 1.009 (0.995, 0.966) | 0.995 (0.966, 1.025) |

15



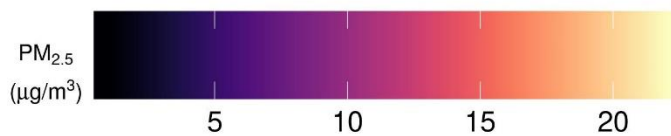

A) Long-term county PM<sub>2.5</sub> (7yr average)

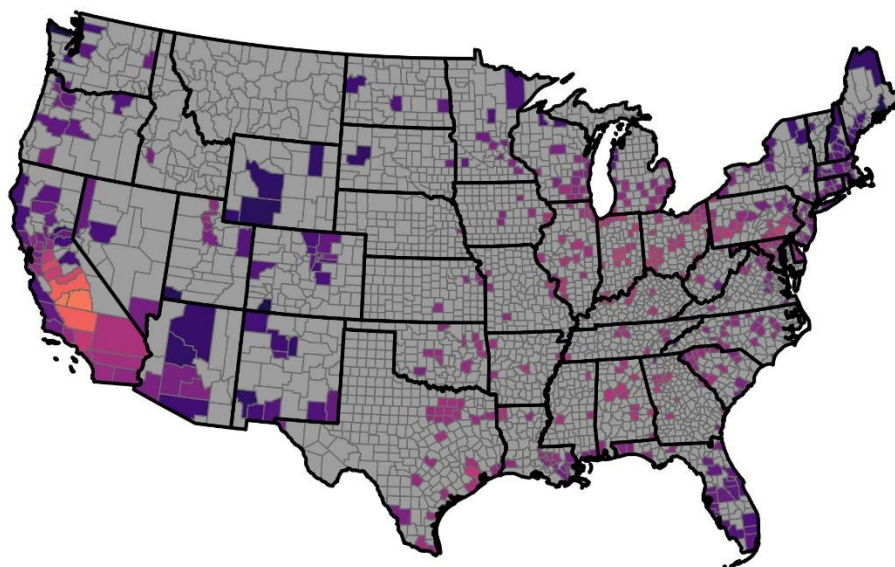

B) 20% of county days are above PM<sub>2.5</sub> (80th percentile)

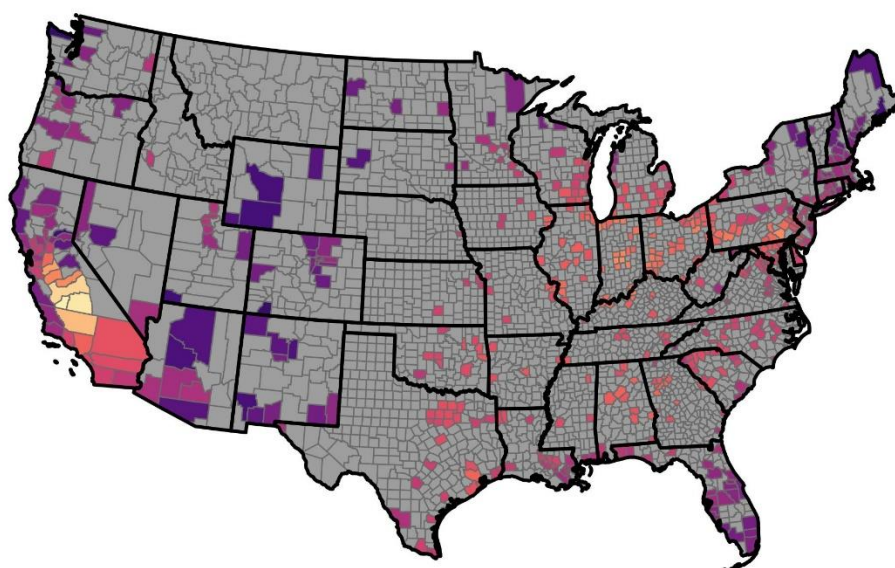

16

1  
2  
3 17 **Figure S1.** County PM<sub>2.5</sub> levels for the 530 counties included in the study. PM<sub>2.5</sub> levels shown  
4  
5 18 include the A) long-term average and B) 80th percentile (indicating that 20% of county days are  
6  
7 19 at or above this PM<sub>2.5</sub> level) for the years 2008-2014.  
8  
9  
10  
11  
12  
13  
14  
15  
16  
17  
18  
19  
20  
21  
22  
23  
24  
25  
26  
27  
28  
29  
30  
31  
32  
33  
34  
35  
36  
37  
38  
39  
40  
41  
42  
43  
44  
45  
46  
47  
48  
49  
50  
51  
52  
53  
54  
55  
56  
57  
58  
59  
60

For peer review only

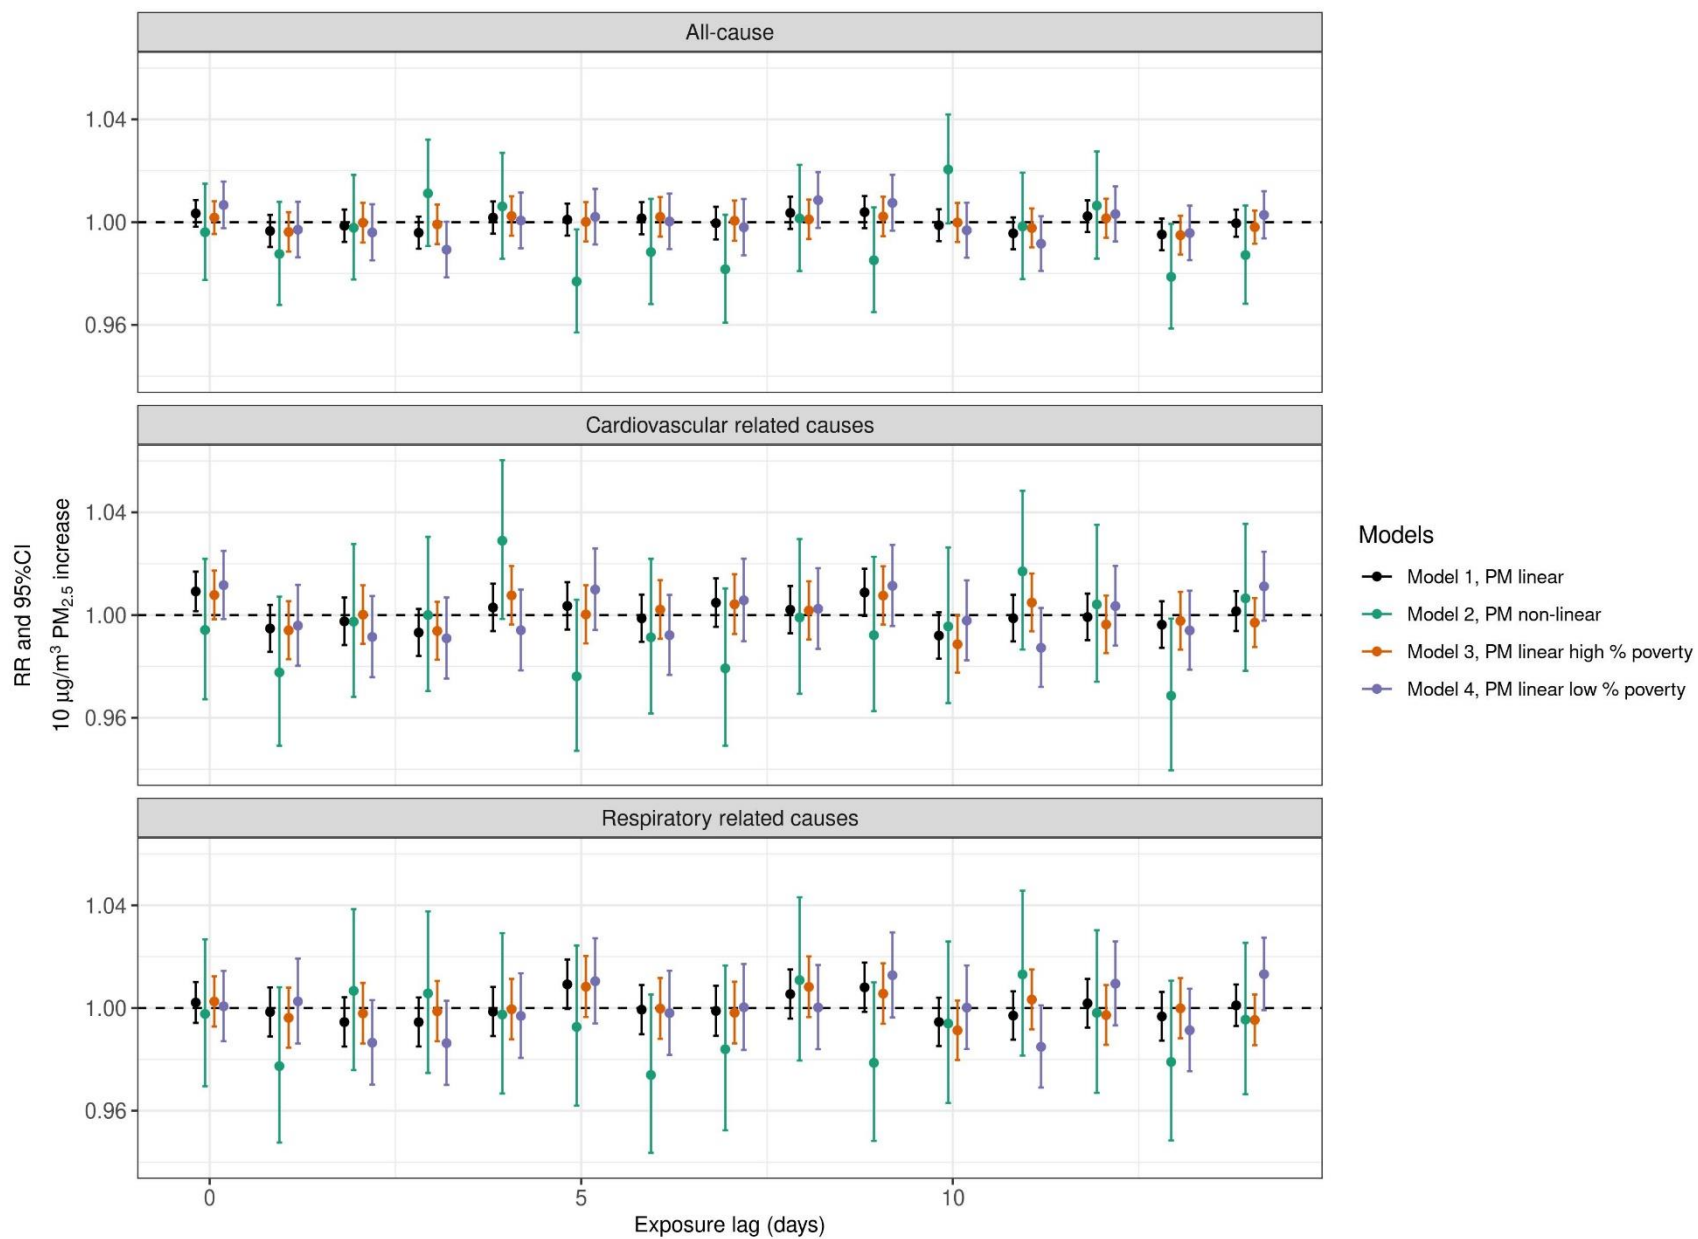

20

10

1  
2  
3 21 **Figure S2.** Relative risk (RR  $\pm$  95%CI) for daily county admission rates for all-cause hospitalization associated with a 10  $\mu\text{g}/\text{m}^3$   
4  
5 22 increase in  $\text{PM}_{2.5}$  for exposure lags 0-14 days using an unconstrained distributed lag model. Models presented include the main  
6  
7 23 model presented in the paper (model 1) where  $\text{PM}_{2.5}$  is considered as a linear variable in black and a model that considers  $\text{PM}_{2.5}$  as a  
8  
9 24 non-linear variable (model 2) in green. Additionally, the main model was stratified on the median of percent of individuals below  
10  
11 25 poverty with respect to county (12.5% below poverty), with model 3 representing the model with counties with high % below poverty  
12  
13 26 in orange and model 4 representing counties with low % below poverty in purple (Table S2).  
14  
15  
16 27  
17  
18 28  
19  
20  
21  
22  
23  
24  
25  
26  
27  
28  
29  
30  
31  
32  
33  
34  
35  
36  
37  
38  
39  
40  
41  
42  
43  
44  
45  
46  
47

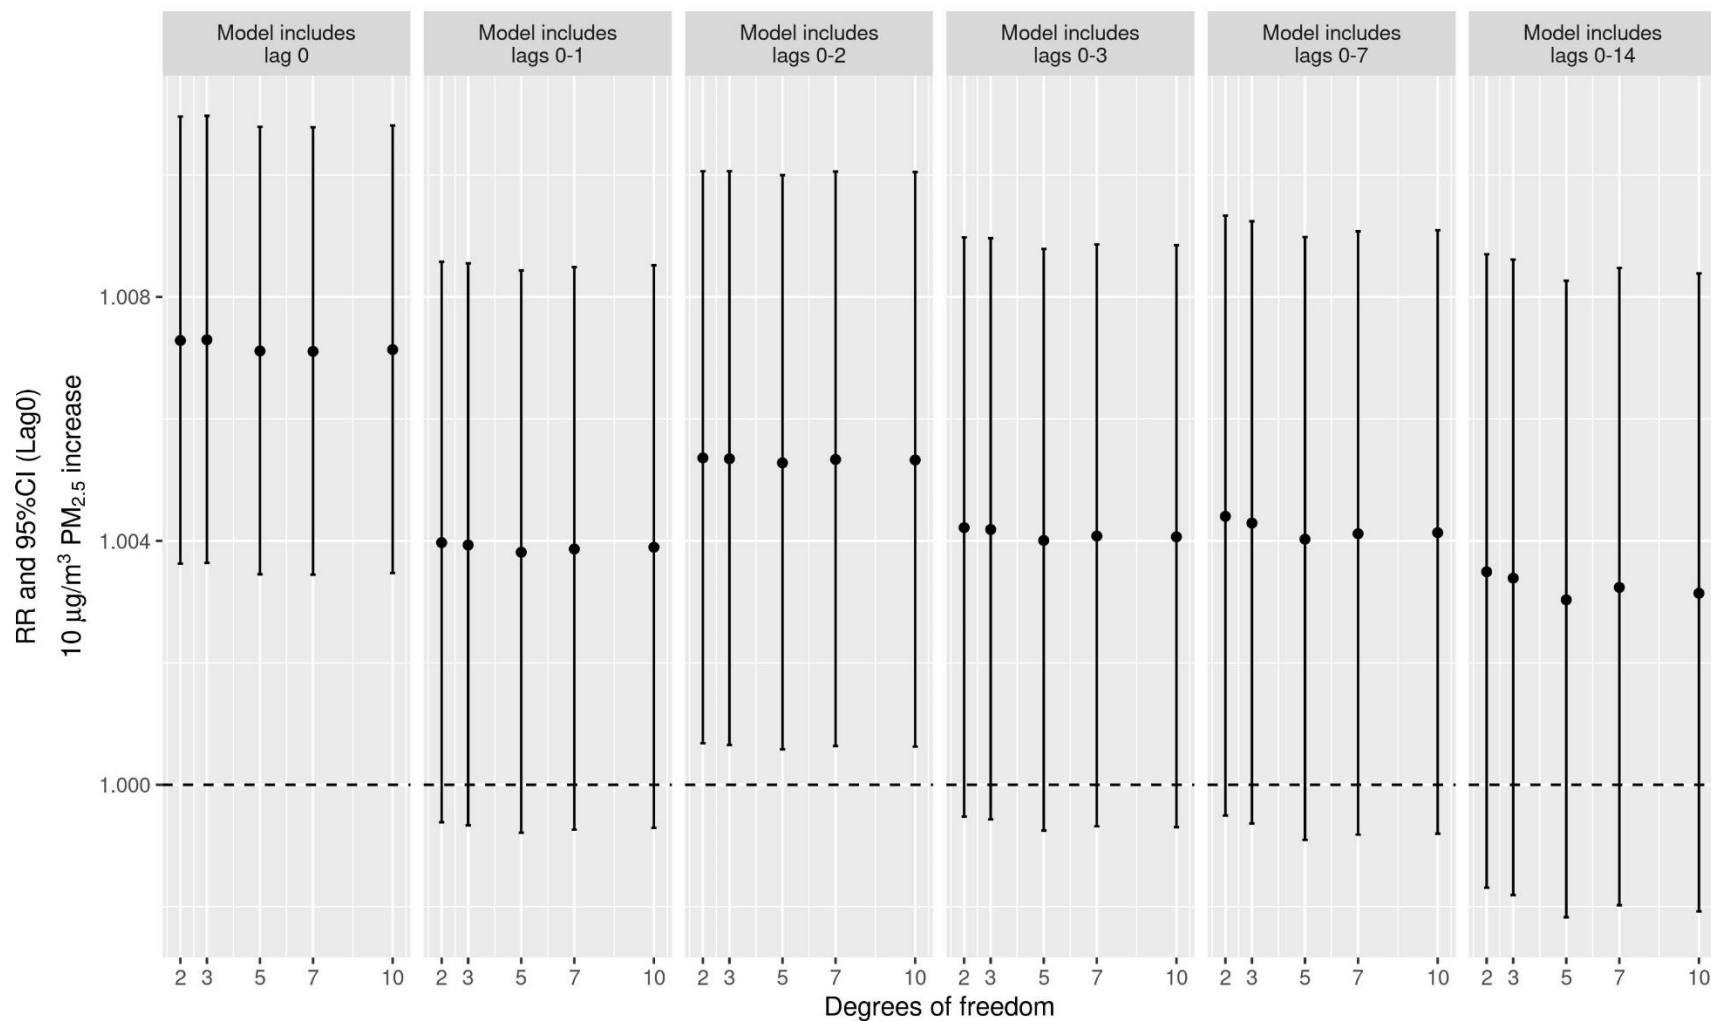

29  
30 **Figure S3.** Sensitivity analysis for all-cause admissions models showing the impact on the lag 0 estimate from changing the number  
31 of lags considered (grouped figures), and the number of degrees of freedom (x-axis) for the temperature and relative humidity  
32 variables. Relative risk (RR ± 95%CI) of all-cause daily county admission rates associated with a 10 µg/m<sup>3</sup> increase in PM<sub>2.5</sub> on lag 0.

33

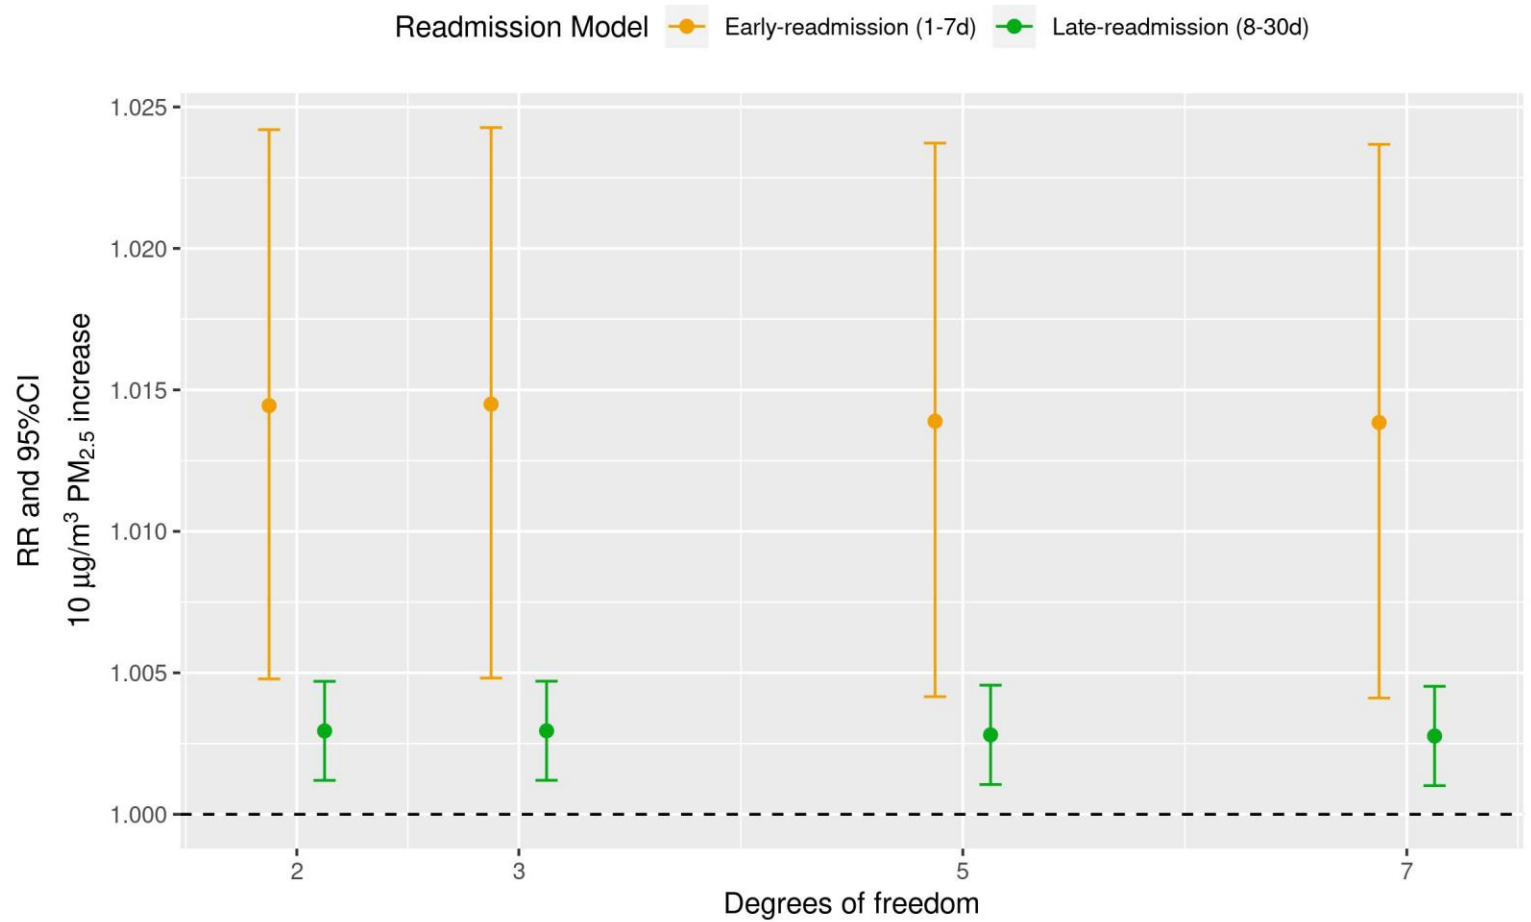

34

35 **Figure S4.** Sensitivity analysis for all-cause readmission models showing the impact on the lag 0 estimate from changing the number  
 36 of degrees of freedom (x-axis) for the temperature and relative humidity variables. Relative risk (RR ± 95%CI) of all-cause daily  
 37 county admission rates associated with a 10 µg/m<sup>3</sup> increase in PM<sub>2.5</sub> on lag 0.

44  
45  
46  
47

STROBE Statement—Checklist of items that should be included in reports of *cohort studies*

|                              | Item No | Recommendation                                                                                                                                                                                                                                                                                                         | Page No |
|------------------------------|---------|------------------------------------------------------------------------------------------------------------------------------------------------------------------------------------------------------------------------------------------------------------------------------------------------------------------------|---------|
| <b>Title and abstract</b>    | 1       | (a) Indicate the study's design with a commonly used term in the title or the abstract<br>(b) Provide in the abstract an informative and balanced summary of what was done and what was found                                                                                                                          | 1-3     |
| <b>Introduction</b>          |         |                                                                                                                                                                                                                                                                                                                        |         |
| Background/rationale         | 2       | Explain the scientific background and rationale for the investigation being reported                                                                                                                                                                                                                                   | 5       |
| Objectives                   | 3       | State specific objectives, including any prespecified hypotheses                                                                                                                                                                                                                                                       | 5-6     |
| <b>Methods</b>               |         |                                                                                                                                                                                                                                                                                                                        |         |
| Study design                 | 4       | Present key elements of study design early in the paper                                                                                                                                                                                                                                                                | 6       |
| Setting                      | 5       | Describe the setting, locations, and relevant dates, including periods of recruitment, exposure, follow-up, and data collection                                                                                                                                                                                        | 6       |
| Participants                 | 6       | (a) Give the eligibility criteria, and the sources and methods of selection of participants. Describe methods of follow-up<br>(b) For matched studies, give matching criteria and number of exposed and unexposed                                                                                                      | 6       |
| Variables                    | 7       | Clearly define all outcomes, exposures, predictors, potential confounders, and effect modifiers. Give diagnostic criteria, if applicable                                                                                                                                                                               | 7-8     |
| Data sources/<br>measurement | 8*      | For each variable of interest, give sources of data and details of methods of assessment (measurement). Describe comparability of assessment methods if there is more than one group                                                                                                                                   | 7-8     |
| Bias                         | 9       | Describe any efforts to address potential sources of bias                                                                                                                                                                                                                                                              | 7-9     |
| Study size                   | 10      | Explain how the study size was arrived at                                                                                                                                                                                                                                                                              | 7-8     |
| Quantitative variables       | 11      | Explain how quantitative variables were handled in the analyses. If applicable, describe which groupings were chosen and why                                                                                                                                                                                           | 8-9     |
| Statistical methods          | 12      | (a) Describe all statistical methods, including those used to control for confounding<br>(b) Describe any methods used to examine subgroups and interactions<br>(c) Explain how missing data were addressed<br>(d) If applicable, explain how loss to follow-up was addressed<br>(e) Describe any sensitivity analyses | 8-9     |
| <b>Results</b>               |         |                                                                                                                                                                                                                                                                                                                        |         |
| Participants                 | 13*     | (a) Report numbers of individuals at each stage of study—eg numbers potentially eligible, examined for eligibility, confirmed eligible, included in the study, completing follow-up, and analysed<br>(b) Give reasons for non-participation at each stage<br>(c) Consider use of a flow diagram                        | 9       |
| Descriptive data             | 14*     | (a) Give characteristics of study participants (eg demographic, clinical, social) and information on exposures and potential confounders<br>(b) Indicate number of participants with missing data for each variable of interest<br>(c) Summarise follow-up time (eg, average and total amount)                         | 9-10    |
| Outcome data                 | 15*     | Report numbers of outcome events or summary measures over time                                                                                                                                                                                                                                                         | 10      |

|    |                          |    |                                                                                                                                                                                                              |       |
|----|--------------------------|----|--------------------------------------------------------------------------------------------------------------------------------------------------------------------------------------------------------------|-------|
| 1  | Main results             | 16 | (a) Give unadjusted estimates and, if applicable, confounder-adjusted estimates and their precision (eg, 95% confidence interval). Make clear which confounders were adjusted for and why they were included | 10-12 |
| 2  |                          |    | (b) Report category boundaries when continuous variables were categorized                                                                                                                                    |       |
| 3  |                          |    | (c) If relevant, consider translating estimates of relative risk into absolute risk for a meaningful time period                                                                                             |       |
| 4  |                          |    |                                                                                                                                                                                                              |       |
| 5  |                          |    |                                                                                                                                                                                                              |       |
| 6  |                          |    |                                                                                                                                                                                                              |       |
| 7  |                          |    |                                                                                                                                                                                                              |       |
| 8  |                          |    |                                                                                                                                                                                                              |       |
| 9  | Other analyses           | 17 | Report other analyses done—eg analyses of subgroups and interactions, and sensitivity analyses                                                                                                               | 12    |
| 10 |                          |    |                                                                                                                                                                                                              |       |
| 11 | <b>Discussion</b>        |    |                                                                                                                                                                                                              |       |
| 12 |                          |    |                                                                                                                                                                                                              |       |
| 13 | Key results              | 18 | Summarise key results with reference to study objectives                                                                                                                                                     | 12-13 |
| 14 |                          |    |                                                                                                                                                                                                              |       |
| 15 | Limitations              | 19 | Discuss limitations of the study, taking into account sources of potential bias or imprecision. Discuss both direction and magnitude of any potential bias                                                   | 15-16 |
| 16 |                          |    |                                                                                                                                                                                                              |       |
| 17 | Interpretation           | 20 | Give a cautious overall interpretation of results considering objectives, limitations, multiplicity of analyses, results from similar studies, and other relevant evidence                                   | 13-16 |
| 18 |                          |    |                                                                                                                                                                                                              |       |
| 19 |                          |    |                                                                                                                                                                                                              |       |
| 20 | Generalisability         | 21 | Discuss the generalisability (external validity) of the study results                                                                                                                                        | 16    |
| 21 |                          |    |                                                                                                                                                                                                              |       |
| 22 | <b>Other information</b> |    |                                                                                                                                                                                                              |       |
| 23 | Funding                  | 22 | Give the source of funding and the role of the funders for the present study and, if applicable, for the original study on which the present article is based                                                | 17    |
| 24 |                          |    |                                                                                                                                                                                                              |       |

25

\*Give information separately for exposed and unexposed groups.

26

27

28

29

30

31

32

33

34

35

36

37

38

39

40

41

42

43

44

45

46

47

48

49

50

51

52

53

54

55

56

57

58

59

60
