# Supplementary material for: Association of short-term exposure to ambient PM2.5 with hospital admissions and 30-day readmissions in end-stage renal disease patients: population-based retrospective cohort study
Source: PubMed Central journal article supplement — BMJ Open. 2020 Dec 15;10(12):e041177. doi: 10.1136/bmjopen-2020-041177 (PMC7745516; doi:10.1136/bmjopen-2020-041177), 2020-12-15
Supplement: bmjopen-2020-041177supp001.pdf [file bmjopen-2020-041177supp001.pdf]

1 **Supplemental Materials**

2

3 **Table S1.** Summary statistics of PM<sub>2.5</sub> and meteorological variables across 530 counties.

| Variable                               | Mean ± SD     | Minimum | Maximum |
|----------------------------------------|---------------|---------|---------|
| PM <sub>2.5</sub> (µg/m <sup>3</sup> ) | 9.29 ± 5.39   | 0.05    | 155.16  |
| Temperature (°F)                       | 56.37 ± 18.50 | -37.30  | 104.74  |
| Relative humidity (%)                  | 65.24 ± 16.24 | 0       | 100     |

4

5 **Table S2.** The relative risk (RR, 95%CI) for an all-cause, cardiovascular, and respiratory related early and late-readmission following  
 6 all-cause and cause-specific discharges. RR is expressed per 10  $\mu\text{g}/\text{m}^3$  increase in  $\text{PM}_{2.5}$ . Models presented include the main model  
 7 presented in the paper (model 1) where  $\text{PM}_{2.5}$  is considered as a linear variable and a model that considers  $\text{PM}_{2.5}$  as a non-linear  
 8 variable (model 2).

|                          |                    |                             | Model 1<br>PM linear | Model 2<br>PM non-linear |
|--------------------------|--------------------|-----------------------------|----------------------|--------------------------|
| Readmission model        | Discharge cause    | Readmission cause           | RR (95%CI)           | RR (95%CI)               |
| Early-readmission (1-7d) | All Causes         | All Causes                  | 1.016 (1.006, 1.026) | 1.089 (1.016, 1.168)     |
| Early-readmission (1-7d) | All Causes         | All Cardiovascular          | 1.009 (0.996, 1.023) | 0.984 (0.892, 1.085)     |
| Early-readmission (1-7d) | All Causes         | Dysrhythmia*                | 1.048 (1.023, 1.074) | 0.898 (0.754, 1.070)     |
| Early-readmission (1-7d) | All Causes         | Heart failure               | 1.037 (1.014, 1.060) | 1.065 (0.906, 1.252)     |
| Early-readmission (1-7d) | All Causes         | Hypertension                | 1.007 (0.990, 1.025) | 1.011 (0.895, 1.141)     |
| Early-readmission (1-7d) | All Causes         | Ischemic heart disease      | 0.970 (0.929, 1.012) | 0.910 (0.678, 1.222)     |
| Early-readmission (1-7d) | All Causes         | Myocardial infarction       | 0.955 (0.906, 1.007) | 0.940 (0.651, 1.358)     |
| Early-readmission (1-7d) | All Causes         | Peripheral arterial disease | 0.900 (0.748, 1.083) | 0.389 (0.121, 1.254)     |
| Early-readmission (1-7d) | All Causes         | All Respiratory             | 1.026 (1.011, 1.040) | 1.082 (0.977, 1.199)     |
| Early-readmission (1-7d) | All Causes         | Asthma                      | 1.102 (0.992, 1.226) | 0.464 (0.240, 0.900)     |
| Early-readmission (1-7d) | All Causes         | COPD                        | 1.040 (1.002, 1.081) | 1.021 (0.763, 1.366)     |
| Early-readmission (1-7d) | All Causes         | Other*                      | 1.027 (1.012, 1.042) | 1.093 (0.981, 1.218)     |
| Early-readmission (1-7d) | All Causes         | Pneumonia                   | 1.065 (1.035, 1.096) | 1.263 (1.012, 1.576)     |
| Early-readmission (1-7d) | All Causes         | Pulmonary embolism          | 1.047 (0.930, 1.179) | 0.911 (0.371, 2.233)     |
| Early-readmission (1-7d) | All Cardiovascular | All Causes                  | 1.018 (1.004, 1.032) | 1.034 (0.933, 1.145)     |
| Early-readmission (1-7d) | All Cardiovascular | All Cardiovascular          | 1.006 (0.989, 1.024) | 0.938 (0.823, 1.070)     |
| Early-readmission (1-7d) | All Cardiovascular | Dysrhythmia*                | 1.043 (1.012, 1.076) | 1.006 (0.793, 1.278)     |
| Early-readmission (1-7d) | All Cardiovascular | Heart failure               | 1.027 (0.999, 1.056) | 0.994 (0.810, 1.221)     |
| Early-readmission (1-7d) | All Cardiovascular | Hypertension                | 1.006 (0.985, 1.028) | 0.911 (0.776, 1.069)     |
| Early-readmission (1-7d) | All Cardiovascular | Ischemic heart disease      | 1.014 (0.963, 1.069) | 0.888 (0.603, 1.309)     |
| Early-readmission (1-7d) | All Cardiovascular | Myocardial infarction       | 0.987 (0.924, 1.054) | 0.901 (0.557, 1.459)     |
| Early-readmission (1-7d) | All Cardiovascular | Peripheral arterial disease | 0.924 (0.693, 1.230) | 0.195 (0.044, 0.875)     |

|                          |                    |                             |                      |                      |
|--------------------------|--------------------|-----------------------------|----------------------|----------------------|
| Early-readmission (1-7d) | All Cardiovascular | All Respiratory             | 1.025 (1.006, 1.045) | 1.015 (0.882, 1.169) |
| Early-readmission (1-7d) | All Cardiovascular | Asthma                      | 1.086 (0.948, 1.243) | 0.335 (0.144, 0.781) |
| Early-readmission (1-7d) | All Cardiovascular | COPD                        | 1.035 (0.985, 1.087) | 0.877 (0.604, 1.275) |
| Early-readmission (1-7d) | All Cardiovascular | Other*                      | 1.025 (1.005, 1.045) | 1.067 (0.919, 1.238) |
| Early-readmission (1-7d) | All Cardiovascular | Pneumonia                   | 1.075 (1.035, 1.117) | 1.124 (0.831, 1.521) |
| Early-readmission (1-7d) | All Cardiovascular | Pulmonary embolism          | 1.134 (0.986, 1.303) | 1.879 (0.544, 6.491) |
| Early-readmission (1-7d) | All Respiratory    | All Causes                  | 1.018 (1.004, 1.032) | 1.041 (0.939, 1.154) |
| Early-readmission (1-7d) | All Respiratory    | All Cardiovascular          | 1.007 (0.988, 1.026) | 1.011 (0.880, 1.161) |
| Early-readmission (1-7d) | All Respiratory    | Dysrhythmia*                | 1.045 (1.011, 1.080) | 0.936 (0.731, 1.198) |
| Early-readmission (1-7d) | All Respiratory    | Heart failure               | 1.017 (0.988, 1.047) | 0.989 (0.802, 1.220) |
| Early-readmission (1-7d) | All Respiratory    | Hypertension                | 1.014 (0.990, 1.038) | 1.056 (0.885, 1.260) |
| Early-readmission (1-7d) | All Respiratory    | Ischemic heart disease      | 0.971 (0.918, 1.028) | 0.783 (0.534, 1.149) |
| Early-readmission (1-7d) | All Respiratory    | Myocardial infarction       | 0.938 (0.872, 1.009) | 0.682 (0.422, 1.102) |
| Early-readmission (1-7d) | All Respiratory    | Peripheral arterial disease | 0.857 (0.603, 1.219) | 0.189 (0.035, 1.004) |
| Early-readmission (1-7d) | All Respiratory    | All Respiratory             | 1.025 (1.006, 1.044) | 1.087 (0.947, 1.248) |
| Early-readmission (1-7d) | All Respiratory    | Asthma                      | 1.074 (0.938, 1.230) | 0.407 (0.180, 0.920) |
| Early-readmission (1-7d) | All Respiratory    | COPD                        | 1.041 (0.993, 1.092) | 0.856 (0.600, 1.223) |
| Early-readmission (1-7d) | All Respiratory    | Other*                      | 1.028 (1.008, 1.048) | 1.114 (0.963, 1.289) |
| Early-readmission (1-7d) | All Respiratory    | Pneumonia                   | 1.049 (1.011, 1.089) | 1.185 (0.890, 1.578) |
| Early-readmission (1-7d) | All Respiratory    | Pulmonary embolism          | 1.075 (0.913, 1.265) | 0.921 (0.265, 3.202) |
| Late-readmission (8-30d) | All Causes         | All Causes                  | 1.013 (1.006, 1.020) | 1.024 (0.974, 1.077) |
| Late-readmission (8-30d) | All Causes         | All Cardiovascular          | 1.017 (1.007, 1.027) | 1.071 (0.995, 1.153) |
| Late-readmission (8-30d) | All Causes         | Dysrhythmia*                | 1.031 (1.013, 1.050) | 1.103 (0.961, 1.266) |
| Late-readmission (8-30d) | All Causes         | Heart failure               | 1.041 (1.025, 1.058) | 1.027 (0.915, 1.154) |
| Late-readmission (8-30d) | All Causes         | Hypertension                | 1.010 (0.998, 1.023) | 1.036 (0.947, 1.135) |
| Late-readmission (8-30d) | All Causes         | Ischemic heart disease      | 1.008 (0.975, 1.042) | 0.858 (0.676, 1.089) |
| Late-readmission (8-30d) | All Causes         | Myocardial infarction       | 0.974 (0.933, 1.017) | 0.722 (0.538, 0.968) |
| Late-readmission (8-30d) | All Causes         | Peripheral arterial disease | 1.003 (0.873, 1.153) | 1.367 (0.511, 3.653) |
| Late-readmission (8-30d) | All Causes         | All Respiratory             | 1.030 (1.020, 1.041) | 1.083 (1.004, 1.169) |
| Late-readmission (8-30d) | All Causes         | Asthma                      | 1.071 (0.998, 1.150) | 1.327 (0.739, 2.382) |
| Late-readmission (8-30d) | All Causes         | COPD                        | 1.046 (1.017, 1.076) | 1.001 (0.813, 1.232) |
| Late-readmission (8-30d) | All Causes         | Other*                      | 1.030 (1.019, 1.041) | 1.113 (1.028, 1.206) |

|                          |                    |                             |                      |                       |
|--------------------------|--------------------|-----------------------------|----------------------|-----------------------|
| Late-readmission (8-30d) | All Causes         | Pneumonia                   | 1.059 (1.037, 1.082) | 1.104 (0.940, 1.297)  |
| Late-readmission (8-30d) | All Causes         | Pulmonary embolism          | 1.063 (0.959, 1.178) | 1.774 (0.742, 4.240)  |
| Late-readmission (8-30d) | All Cardiovascular | All Causes                  | 1.012 (1.003, 1.022) | 1.030 (0.956, 1.109)  |
| Late-readmission (8-30d) | All Cardiovascular | All Cardiovascular          | 1.016 (1.003, 1.029) | 1.048 (0.950, 1.157)  |
| Late-readmission (8-30d) | All Cardiovascular | Dysrhythmia*                | 1.035 (1.012, 1.058) | 1.058 (0.884, 1.266)  |
| Late-readmission (8-30d) | All Cardiovascular | Heart failure               | 1.035 (1.015, 1.055) | 1.055 (0.907, 1.227)  |
| Late-readmission (8-30d) | All Cardiovascular | Hypertension                | 1.007 (0.991, 1.023) | 1.002 (0.889, 1.129)  |
| Late-readmission (8-30d) | All Cardiovascular | Ischemic heart disease      | 0.977 (0.936, 1.020) | 0.740 (0.542, 1.010)  |
| Late-readmission (8-30d) | All Cardiovascular | Myocardial infarction       | 0.946 (0.894, 1.002) | 0.593 (0.405, 0.868)  |
| Late-readmission (8-30d) | All Cardiovascular | Peripheral arterial disease | 1.013 (0.815, 1.258) | 1.084 (0.257, 4.566)  |
| Late-readmission (8-30d) | All Cardiovascular | All Respiratory             | 1.028 (1.015, 1.042) | 1.086 (0.978, 1.206)  |
| Late-readmission (8-30d) | All Cardiovascular | Asthma                      | 1.057 (0.963, 1.160) | 1.424 (0.654, 3.097)  |
| Late-readmission (8-30d) | All Cardiovascular | COPD                        | 1.047 (1.011, 1.084) | 0.840 (0.645, 1.094)  |
| Late-readmission (8-30d) | All Cardiovascular | Other*                      | 1.028 (1.014, 1.042) | 1.130 (1.012, 1.262)  |
| Late-readmission (8-30d) | All Cardiovascular | Pneumonia                   | 1.052 (1.023, 1.082) | 1.203 (0.963, 1.504)  |
| Late-readmission (8-30d) | All Cardiovascular | Pulmonary embolism          | 1.036 (0.909, 1.181) | 1.251 (0.389, 4.020)  |
| Late-readmission (8-30d) | All Respiratory    | All Causes                  | 1.010 (1.000, 1.020) | 1.039 (0.963, 1.120)  |
| Late-readmission (8-30d) | All Respiratory    | All Cardiovascular          | 1.020 (1.006, 1.034) | 1.076 (0.970, 1.194)  |
| Late-readmission (8-30d) | All Respiratory    | Dysrhythmia*                | 1.037 (1.012, 1.062) | 1.053 (0.869, 1.277)  |
| Late-readmission (8-30d) | All Respiratory    | Heart failure               | 1.034 (1.013, 1.055) | 1.130 (0.968, 1.319)  |
| Late-readmission (8-30d) | All Respiratory    | Hypertension                | 1.013 (0.996, 1.030) | 1.040 (0.914, 1.184)  |
| Late-readmission (8-30d) | All Respiratory    | Ischemic heart disease      | 0.975 (0.932, 1.002) | 0.759 (0.553, 1.040)  |
| Late-readmission (8-30d) | All Respiratory    | Myocardial infarction       | 0.948 (0.893, 1.006) | 0.710 (0.472, 1.069)  |
| Late-readmission (8-30d) | All Respiratory    | Peripheral arterial disease | 1.102 (0.894, 1.359) | 1.895 (0.351, 10.226) |
| Late-readmission (8-30d) | All Respiratory    | All Respiratory             | 1.019 (1.005, 1.032) | 1.078 (0.974, 1.193)  |
| Late-readmission (8-30d) | All Respiratory    | Asthma                      | 0.996 (0.905, 1.095) | 1.200 (0.579, 2.489)  |
| Late-readmission (8-30d) | All Respiratory    | COPD                        | 1.026 (0.991, 1.063) | 0.887 (0.691, 1.138)  |
| Late-readmission (8-30d) | All Respiratory    | Other*                      | 1.019 (1.005, 1.033) | 1.119 (1.005, 1.246)  |
| Late-readmission (8-30d) | All Respiratory    | Pneumonia                   | 1.062 (1.033, 1.092) | 1.178 (0.947, 1.465)  |
| Late-readmission (8-30d) | All Respiratory    | Pulmonary embolism          | 1.070 (0.915, 1.252) | 1.848 (0.599, 5.701)  |

10 **Table S3.** Relative risk (RR  $\pm$  95% CI) of all-cause and cause-specific daily county admission rates associated with a 10  $\mu\text{g}/\text{m}^3$   
 11 increase in  $\text{PM}_{2.5}$  for exposure lags 0-14 days. Models presented include the main model presented in the paper (model 1) where  
 12  $\text{PM}_{2.5}$  is considered as a linear variable and a model that considers  $\text{PM}_{2.5}$  as a non-linear variable (model 2). Additionally, the main  
 13 model was stratified on the median of percent of individuals below poverty with respect to county (12.5% below poverty), with model  
 14 3 representing the model with counties with high % below poverty and model 4 representing counties with low % below poverty.

|                               |     | Model 1, PM linear   | Model 2, PM non-linear | Model 3, PM linear high % poverty | Model 4, PM linear low % poverty |
|-------------------------------|-----|----------------------|------------------------|-----------------------------------|----------------------------------|
| Endpoint                      | Lag | RR (95%CI)           | RR (95%CI)             | RR (95%CI)                        | RR (95%CI)                       |
| All-cause                     | 0   | 1.003 (0.998, 1.009) | 0.998 (1.009, 0.996)   | 1.009 (0.996, 0.978)              | 0.996 (0.978, 1.015)             |
| All-cause                     | 1   | 0.997 (0.99, 1.003)  | 0.99 (1.003, 0.988)    | 1.003 (0.988, 0.968)              | 0.988 (0.968, 1.008)             |
| All-cause                     | 2   | 0.999 (0.992, 1.005) | 0.992 (1.005, 0.998)   | 1.005 (0.998, 0.978)              | 0.998 (0.978, 1.018)             |
| All-cause                     | 3   | 0.996 (0.99, 1.002)  | 0.99 (1.002, 1.011)    | 1.002 (1.011, 0.991)              | 1.011 (0.991, 1.032)             |
| All-cause                     | 4   | 1.002 (0.996, 1.008) | 0.996 (1.008, 1.006)   | 1.008 (1.006, 0.986)              | 1.006 (0.986, 1.027)             |
| All-cause                     | 5   | 1.001 (0.995, 1.007) | 0.995 (1.007, 0.977)   | 1.007 (0.977, 0.957)              | 0.977 (0.957, 0.997)             |
| All-cause                     | 6   | 1.001 (0.995, 1.008) | 0.995 (1.008, 0.988)   | 1.008 (0.988, 0.968)              | 0.988 (0.968, 1.009)             |
| All-cause                     | 7   | 1 (0.993, 1.006)     | 0.993 (1.006, 0.982)   | 1.006 (0.982, 0.961)              | 0.982 (0.961, 1.003)             |
| All-cause                     | 8   | 1.004 (0.997, 1.01)  | 0.997 (1.01, 1.001)    | 1.01 (1.001, 0.981)               | 1.001 (0.981, 1.022)             |
| All-cause                     | 9   | 1.004 (0.998, 1.01)  | 0.998 (1.01, 0.985)    | 1.01 (0.985, 0.965)               | 0.985 (0.965, 1.006)             |
| All-cause                     | 10  | 0.999 (0.993, 1.005) | 0.993 (1.005, 1.02)    | 1.005 (1.02, 1)                   | 1.02 (1, 1.042)                  |
| All-cause                     | 11  | 0.996 (0.989, 1.002) | 0.989 (1.002, 0.998)   | 1.002 (0.998, 0.978)              | 0.998 (0.978, 1.019)             |
| All-cause                     | 12  | 1.002 (0.996, 1.009) | 0.996 (1.009, 1.006)   | 1.009 (1.006, 0.986)              | 1.006 (0.986, 1.028)             |
| All-cause                     | 13  | 0.995 (0.989, 1.001) | 0.989 (1.001, 0.979)   | 1.001 (0.979, 0.959)              | 0.979 (0.959, 0.999)             |
| All-cause                     | 14  | 1 (0.994, 1.005)     | 0.994 (1.005, 0.987)   | 1.005 (0.987, 0.968)              | 0.987 (0.968, 1.006)             |
| Cardiovascular related causes | 0   | 1.009 (1.002, 1.017) | 1.002 (1.017, 0.994)   | 1.017 (0.994, 0.967)              | 0.994 (0.967, 1.022)             |
| Cardiovascular related causes | 1   | 0.995 (0.986, 1.004) | 0.986 (1.004, 0.978)   | 1.004 (0.978, 0.949)              | 0.978 (0.949, 1.007)             |

|                               |    |                      |                      |                      |                      |
|-------------------------------|----|----------------------|----------------------|----------------------|----------------------|
| Cardiovascular related causes | 2  | 0.998 (0.988, 1.007) | 0.988 (1.007, 0.997) | 1.007 (0.997, 0.968) | 0.997 (0.968, 1.028) |
| Cardiovascular related causes | 3  | 0.993 (0.984, 1.002) | 0.984 (1.002, 1)     | 1.002 (1, 0.97)      | 1 (0.97, 1.03)       |
| Cardiovascular related causes | 4  | 1.003 (0.994, 1.012) | 0.994 (1.012, 1.029) | 1.012 (1.029, 0.999) | 1.029 (0.999, 1.06)  |
| Cardiovascular related causes | 5  | 1.004 (0.994, 1.013) | 0.994 (1.013, 0.976) | 1.013 (0.976, 0.947) | 0.976 (0.947, 1.006) |
| Cardiovascular related causes | 6  | 0.999 (0.99, 1.008)  | 0.99 (1.008, 0.991)  | 1.008 (0.991, 0.962) | 0.991 (0.962, 1.022) |
| Cardiovascular related causes | 7  | 1.005 (0.995, 1.014) | 0.995 (1.014, 0.979) | 1.014 (0.979, 0.949) | 0.979 (0.949, 1.01)  |
| Cardiovascular related causes | 8  | 1.002 (0.993, 1.011) | 0.993 (1.011, 0.999) | 1.011 (0.999, 0.969) | 0.999 (0.969, 1.03)  |
| Cardiovascular related causes | 9  | 1.009 (1, 1.018)     | 1 (1.018, 0.992)     | 1.018 (0.992, 0.963) | 0.992 (0.963, 1.023) |
| Cardiovascular related causes | 10 | 0.992 (0.983, 1.001) | 0.983 (1.001, 0.996) | 1.001 (0.996, 0.966) | 0.996 (0.966, 1.026) |
| Cardiovascular related causes | 11 | 0.999 (0.99, 1.008)  | 0.99 (1.008, 1.017)  | 1.008 (1.017, 0.987) | 1.017 (0.987, 1.048) |
| Cardiovascular related causes | 12 | 0.999 (0.99, 1.008)  | 0.99 (1.008, 1.004)  | 1.008 (1.004, 0.974) | 1.004 (0.974, 1.035) |
| Cardiovascular related causes | 13 | 0.996 (0.987, 1.005) | 0.987 (1.005, 0.969) | 1.005 (0.969, 0.94)  | 0.969 (0.94, 0.999)  |
| Cardiovascular related causes | 14 | 1.002 (0.994, 1.009) | 0.994 (1.009, 1.007) | 1.009 (1.007, 0.978) | 1.007 (0.978, 1.036) |
| Respiratory related causes    | 0  | 1.002 (0.994, 1.01)  | 0.994 (1.01, 0.998)  | 1.01 (0.998, 0.97)   | 0.998 (0.97, 1.027)  |
| Respiratory related causes    | 1  | 0.998 (0.989, 1.008) | 0.989 (1.008, 0.977) | 1.008 (0.977, 0.948) | 0.977 (0.948, 1.008) |
| Respiratory related causes    | 2  | 0.995 (0.985, 1.004) | 0.985 (1.004, 1.007) | 1.004 (1.007, 0.976) | 1.007 (0.976, 1.039) |
| Respiratory related causes    | 3  | 0.995 (0.985, 1.004) | 0.985 (1.004, 1.006) | 1.004 (1.006, 0.975) | 1.006 (0.975, 1.038) |
| Respiratory related causes    | 4  | 0.999 (0.989, 1.008) | 0.989 (1.008, 0.997) | 1.008 (0.997, 0.967) | 0.997 (0.967, 1.029) |

|                            |    |                      |                      |                      |                      |
|----------------------------|----|----------------------|----------------------|----------------------|----------------------|
| Respiratory related causes | 5  | 1.009 (1, 1.019)     | 1 (1.019, 0.993)     | 1.019 (0.993, 0.962) | 0.993 (0.962, 1.024) |
| Respiratory related causes | 6  | 0.999 (0.99, 1.009)  | 0.99 (1.009, 0.974)  | 1.009 (0.974, 0.944) | 0.974 (0.944, 1.005) |
| Respiratory related causes | 7  | 0.999 (0.989, 1.009) | 0.989 (1.009, 0.984) | 1.009 (0.984, 0.952) | 0.984 (0.952, 1.017) |
| Respiratory related causes | 8  | 1.005 (0.996, 1.015) | 0.996 (1.015, 1.011) | 1.015 (1.011, 0.98)  | 1.011 (0.98, 1.043)  |
| Respiratory related causes | 9  | 1.008 (0.999, 1.018) | 0.999 (1.018, 0.979) | 1.018 (0.979, 0.948) | 0.979 (0.948, 1.01)  |
| Respiratory related causes | 10 | 0.995 (0.985, 1.004) | 0.985 (1.004, 0.994) | 1.004 (0.994, 0.963) | 0.994 (0.963, 1.026) |
| Respiratory related causes | 11 | 0.997 (0.988, 1.007) | 0.988 (1.007, 1.013) | 1.007 (1.013, 0.981) | 1.013 (0.981, 1.046) |
| Respiratory related causes | 12 | 1.002 (0.992, 1.011) | 0.992 (1.011, 0.998) | 1.011 (0.998, 0.967) | 0.998 (0.967, 1.03)  |
| Respiratory related causes | 13 | 0.997 (0.987, 1.006) | 0.987 (1.006, 0.979) | 1.006 (0.979, 0.948) | 0.979 (0.948, 1.011) |
| Respiratory related causes | 14 | 1.001 (0.993, 1.009) | 0.993 (1.009, 0.995) | 1.009 (0.995, 0.966) | 0.995 (0.966, 1.025) |

15

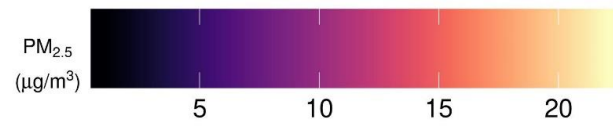

A) Long-term county PM<sub>2.5</sub> (7yr average)

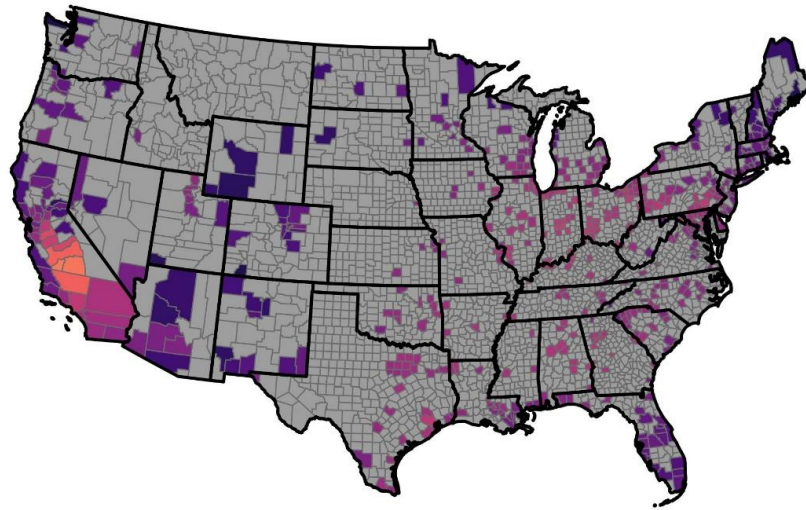

B) 20% of county days are above PM<sub>2.5</sub> (80th percentile)

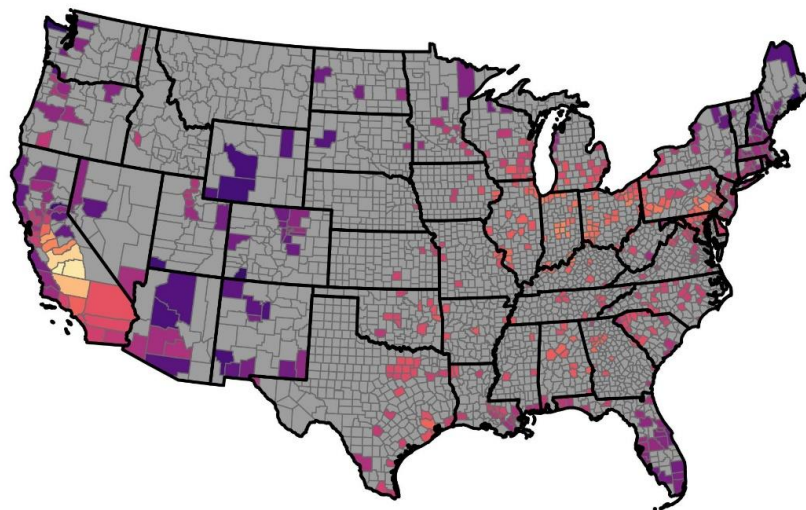



17 **Figure S1.** County PM<sub>2.5</sub> levels for the 530 counties included in the study. PM<sub>2.5</sub> levels shown  
18 include the A) long-term average and B) 80th percentile (indicating that 20% of county days are  
19 at or above this PM<sub>2.5</sub> level) for the years 2008-2014.

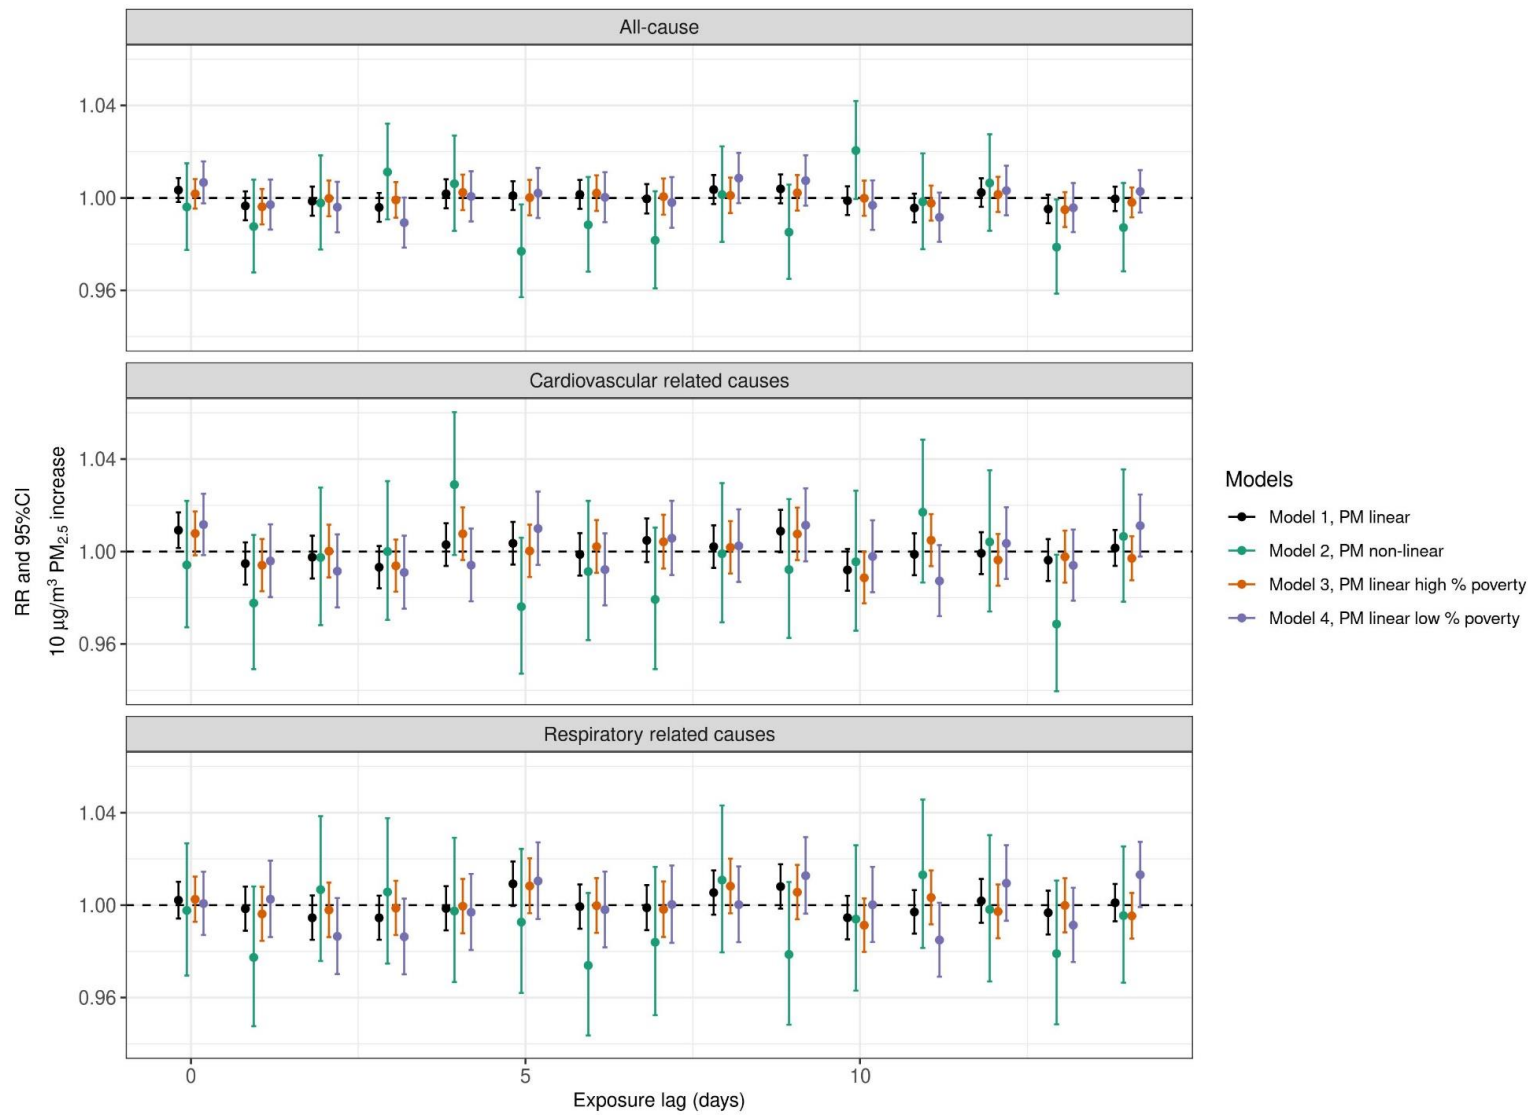

21 **Figure S2.** Relative risk (RR  $\pm$  95%CI) for daily county admission rates for all-cause hospitalization associated with a 10  $\mu\text{g}/\text{m}^3$   
22 increase in  $\text{PM}_{2.5}$  for exposure lags 0-14 days using an unconstrained distributed lag model. Models presented include the main  
23 model presented in the paper (model 1) where  $\text{PM}_{2.5}$  is considered as a linear variable in black and a model that considers  $\text{PM}_{2.5}$  as a  
24 non-linear variable (model 2) in green. Additionally, the main model was stratified on the median of percent of individuals below  
25 poverty with respect to county (12.5% below poverty), with model 3 representing the model with counties with high % below poverty  
26 in orange and model 4 representing counties with low % below poverty in purple (Table S2).

27

28

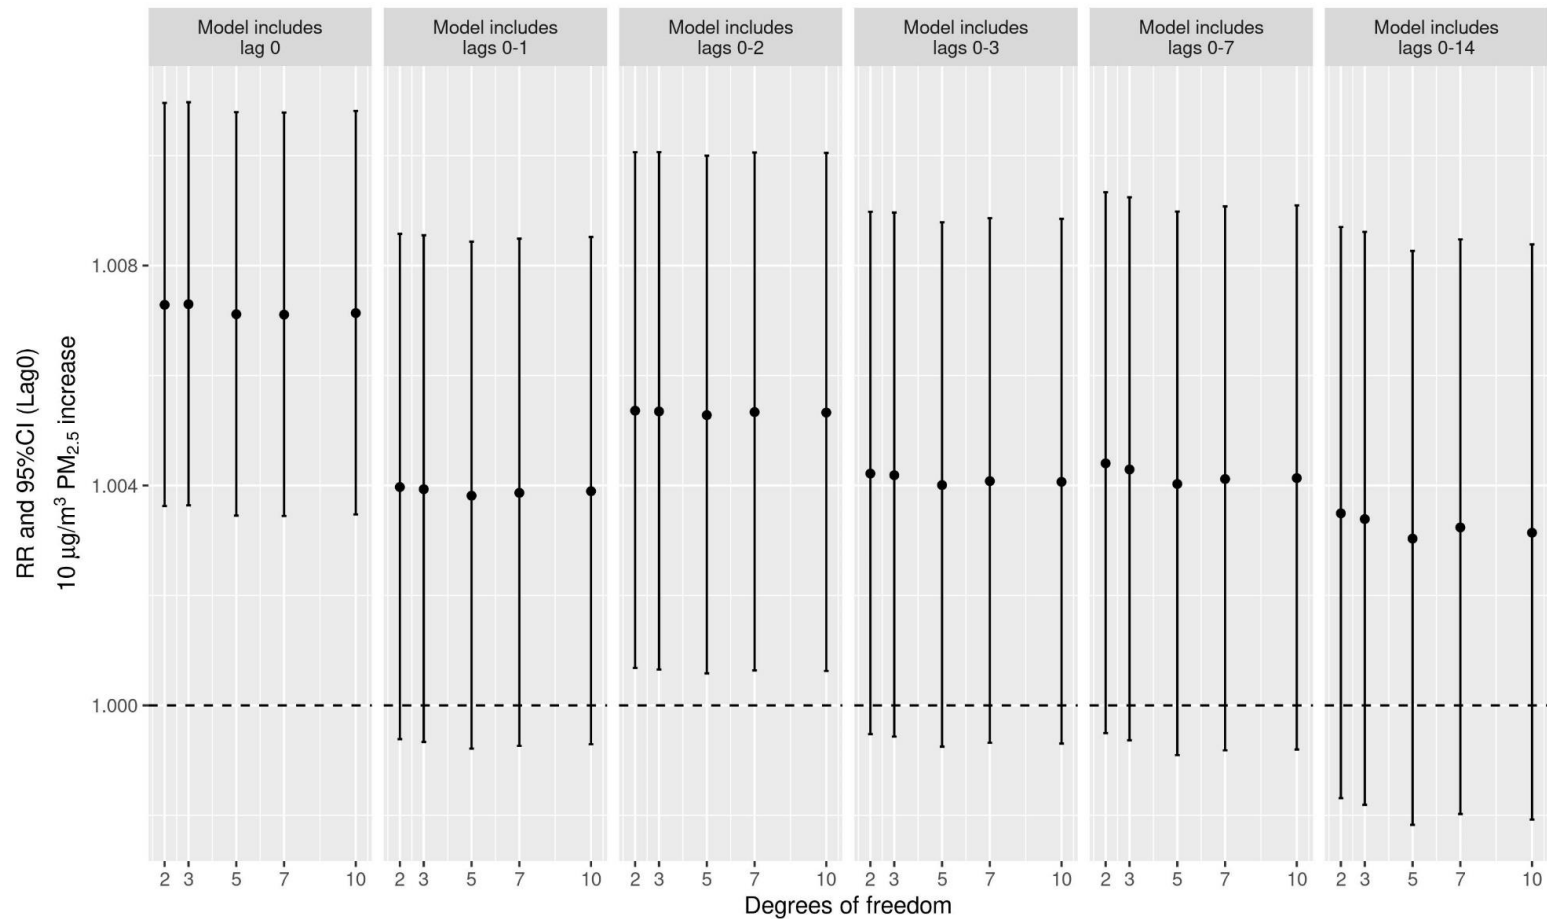

29

30 **Figure S3.** Sensitivity analysis for all-cause admissions models showing the impact on the lag 0 estimate from changing the number  
 31 of lags considered (grouped figures), and the number of degrees of freedom (x-axis) for the temperature and relative humidity  
 32 variables. Relative risk (RR ± 95%CI) of all-cause daily county admission rates associated with a 10 µg/m<sup>3</sup> increase in PM<sub>2.5</sub> on lag 0.

12

33

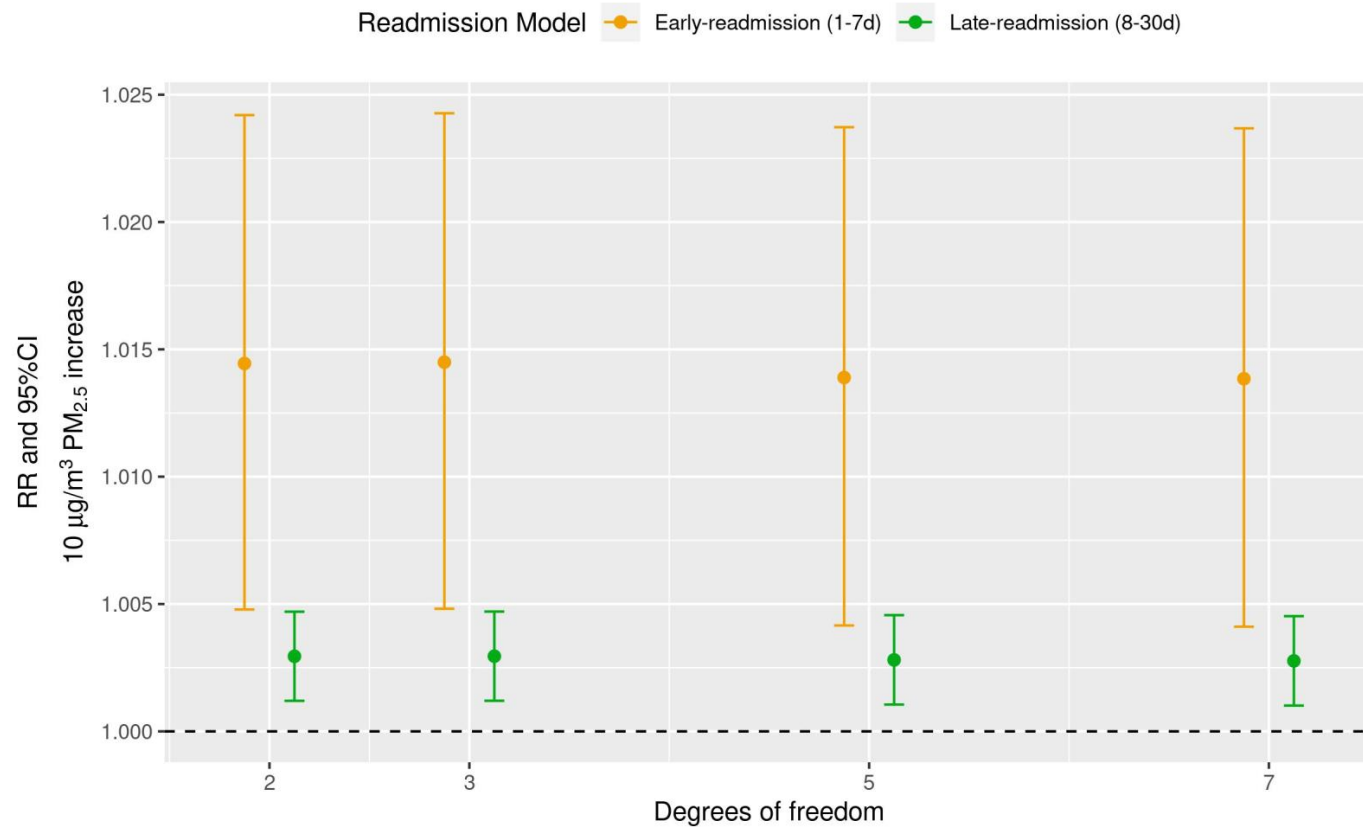

34

35 **Figure S4.** Sensitivity analysis for all-cause readmission models showing the impact on the lag 0 estimate from changing the number  
36 of degrees of freedom (x-axis) for the temperature and relative humidity variables. Relative risk (RR ± 95%CI) of all-cause daily  
37 county admission rates associated with a 10 µg/m<sup>3</sup> increase in PM<sub>2.5</sub> on lag 0.

13
